# Supplementary material for: Gene Expression Profiling in Coeliac Disease Confirmed the Key Role of the Immune System and Revealed a Molecular Overlap with Non-Celiac Gluten Sensitivity
Source: Int J Mol Sci. 2023 Apr 24;24(9):7769. doi: 10.3390/ijms24097769 (PMC10178871; doi:10.3390/ijms24097769)
Supplement: Supplementary file 1 [file ijms-24-07769-s001.zip]

Archive with 10 entries (10 files):
- Supplementary Captions.pdf
- Supplementary Table S1.xlsx
- Supplementary Table S2.xlsx
- Supplementary Table S3.xlsx
- Supplementary Table S4.xlsx
- Supplementary Table S5.xlsx
- Supplementary Table S6.xlsx
- Supplementary Table S7.xlsx
- Supplementary Table S8.xlsx
- Supplementary_Figure S1.TIF
