# Supplementary material for: Gene Expression Profiling in Coeliac Disease Confirmed the Key Role of the Immune System and Revealed a Molecular Overlap with Non-Celiac Gluten Sensitivity
Source: Int J Mol Sci. 2023 Apr 24;24(9):7769. doi: 10.3390/ijms24097769 (PMC10178871; doi:10.3390/ijms24097769)
Supplement: Supplementary file 1 [file ijms-24-07769-s001.zip › Supplementary Table S1.xlsx]

## Sheet: Foglio1
Probe ID	Gene Symbol	Gene Group	Mean Controls	SD Controls	Mean Celiacs	SD Celiacs	FDR	up_down
A_22_P00023195	ADAMTS19-AS1	AS	2.51042	0.779566	1.32136	0.351296	0.020144	Down regulated
A_21_P0000571	ADORA2A-AS1	AS	8.49385	0.563117	4.81013	2.03636	0.00679331	Down regulated
A_21_P0000570	ADORA2A-AS1	AS	7.76388	0.762735	5.03319	0.948452	0.00375642	Down regulated
A_22_P00015269	ARHGEF3-AS1	AS	2.26859	1.03026	1.07753	0.0217	0.0332487	Down regulated
A_21_P0000706	BHLHE40-AS1	AS	2.15025	0.736671	3.54483	0.708763	0.0185889	Up regulated
A_22_P00009214	BZRAP1-AS1	AS	1.93094	0.564878	3.18497	0.554495	0.0125159	Up regulated
A_33_P3354374	C1QTNF1-AS1	AS	2.39592	0.681628	1.24738	0.644753	0.0240875	Down regulated
A_23_P307502	CDKN2A-AS1	AS	1.9065	1.05639	3.20113	0.661518	0.0379508	Up regulated
A_19_P00322815	CDKN2B-AS1	AS	6.65761	0.879952	5.32207	0.54685	0.0234197	Down regulated
A_33_P3311621	CSTF3-AS1	AS	2.94835	0.966309	4.0504	0.363298	0.0380323	Up regulated
A_22_P00017184	DARS-AS1	AS	5.84445	0.733039	4.80592	0.277593	0.0234197	Down regulated
A_22_P00000167	DNMBP-AS1	AS	4.72127	0.713838	3.59811	0.688939	0.0288892	Down regulated
A_22_P00017118	DOCK9-AS1	AS	2.1412	0.410838	1.07387	0.0164576	0.00337158	Down regulated
A_23_P256965	FAM167A-AS1	AS	4.221	0.764003	2.95314	1.16615	0.0418464	Down regulated
A_33_P3217009	FEZF1-AS1	AS	4.39197	0.76081	5.53664	1.06544	0.0463475	Up regulated
A_33_P3238785	FMR1-AS1	AS	1.7006	0.454089	2.78961	0.866137	0.0255532	Up regulated
A_22_P00008308	FOXD3-AS1	AS	12.5499	0.392199	13.8291	0.188719	0.00176261	Up regulated
A_33_P3227269	GATA3-AS1	AS	2.2532	0.659173	3.66174	1.24891	0.0330572	Up regulated
A_32_P125832	GATA6-AS1	AS	7.47052	0.366324	5.8107	0.595295	0.00268661	Down regulated
A_21_P0003986	GDNF-AS1	AS	3.01633	1.18601	1.28873	0.270244	0.020144	Down regulated
A_19_P00801041	GNASAS	AS	4.72333	0.596454	5.72934	0.952563	0.0428835	Up regulated
A_22_P00020616	GPC6-AS2	AS	1.7344	0.756677	3.38884	1.90062	0.0496217	Up regulated
A_23_P303978	HOXA-AS2	AS	2.62879	0.765521	1.18346	0.0476607	0.0095984	Down regulated
A_21_P0000588	HOXB-AS3	AS	7.61474	0.679776	8.638	0.242445	0.0199791	Up regulated
A_22_P00002236	KCNMA1-AS1	AS	3.72598	1.19679	1.6286	0.586183	0.0148499	Down regulated
A_22_P00008952	KRTAP5-AS1	AS	3.21851	0.753298	2.11878	0.810978	0.0375525	Down regulated
A_33_P7491516	LCMT1-AS2	AS	1.42749	0.289261	2.8389	0.483176	0.00213556	Up regulated
A_22_P00015228	MLK7-AS1	AS	2.24193	1.24994	4.17121	1.92526	0.0493917	Up regulated
A_21_P0002521	MLK7-AS1	AS	2.25539	1.30931	4.2709	1.94555	0.0474993	Up regulated
A_21_P0004803	MLLT4-AS1	AS	3.07984	1.08107	1.74217	0.747525	0.038837	Down regulated
A_21_P0000687	NPPA-AS1	AS	3.96235	1.015	2.74379	0.488571	0.0360043	Down regulated
A_21_P0004297	P4HA2-AS1	AS	1.78456	0.49595	3.03009	0.645061	0.012765	Up regulated
A_22_P00019726	PHKA2-AS1	AS	5.19746	0.722085	4.01798	0.86776	0.0327267	Down regulated
A_21_P0000578	PHKA2-AS1	AS	5.85184	0.509516	4.48234	1.11013	0.0248891	Down regulated
A_22_P00025447	PIK3IP1-AS1	AS	3.815	0.482566	2.25705	0.946941	0.0128984	Down regulated
A_22_P00011766	PITRM1-AS1	AS	3.8799	0.730788	2.54628	1.13191	0.035064	Down regulated
A_22_P00001449	PRKCA-AS1	AS	3.35173	1.04813	1.69436	0.657198	0.0211129	Down regulated
A_22_P00014410	SACS-AS1	AS	1.33463	0.113113	2.43836	1.22031	0.0372407	Up regulated
A_22_P00007536	SAP30L-AS1	AS	4.22681	0.910698	3.18095	0.476833	0.0403586	Down regulated
A_33_P3212500	SEMA3F-AS1	AS	4.44163	0.866937	3.39927	0.713378	0.0454901	Down regulated
A_22_P00001621	SGMS1-AS1	AS	6.34108	0.571052	7.50207	0.475226	0.013184	Up regulated
A_33_P3694746	SLC2A1-AS1	AS	2.7524	0.714143	3.97183	0.425711	0.0173958	Up regulated
A_22_P00018303	SMAD1-AS1	AS	3.73312	1.04694	5.78071	0.442764	0.0101614	Up regulated
A_21_P0000607	ST3GAL4-AS1	AS	3.06612	0.977048	4.10643	0.14976	0.0403424	Up regulated
A_33_P3355408	STAU2-AS1	AS	3.88021	0.503923	5.14843	0.974354	0.023627	Up regulated
A_21_P0014520	SYNE1-AS1	AS	3.3748	0.865324	2.22064	0.639788	0.0342902	Down regulated
A_33_P3386237	TAT-AS1	AS	5.21211	0.661354	3.90973	0.213056	0.00942125	Down regulated
A_22_P00011072	WDR86-AS1	AS	3.36315	1.5124	1.5779	0.710242	0.0371849	Down regulated
A_22_P00016131	ZBTB20-AS1	AS	1.99491	0.871635	3.0406	0.541592	0.0392745	Up regulated
A_22_P00018346	ZNF213-AS1	AS	11.7041	0.698113	13.0732	0.486953	0.0129184	Up regulated
A_33_P3294002	A4GALT	Coding Gene	7.93841	0.806266	9.93403	0.352388	0.00485156	Up regulated
A_33_P3335398	AATK	Coding Gene	3.90133	0.632779	2.18995	1.13739	0.0175262	Down regulated
A_23_P10559	AATK	Coding Gene	11.282	0.588621	9.97987	0.750515	0.0173958	Down regulated
A_23_P128094	ABCB9	Coding Gene	3.95431	0.464288	2.91648	0.34174	0.00928871	Down regulated
A_23_P44569	ABCC2	Coding Gene	11.2152	0.607986	10.1947	0.251915	0.0157637	Down regulated
A_33_P3389518	ABCC2	Coding Gene	4.77018	0.893044	2.76502	0.984931	0.0136541	Down regulated
A_33_P3399598	ABCD4	Coding Gene	2.86663	0.703475	1.59766	0.920409	0.0290491	Down regulated
A_23_P395172	ABHD2	Coding Gene	7.57857	1.08289	5.92763	0.824463	0.0255588	Down regulated
A_33_P3358295	ABTB1	Coding Gene	9.69668	0.240114	8.62427	0.424032	0.0036612	Down regulated
A_23_P24515	ACAT1	Coding Gene	13.3462	0.254066	12.3392	0.560569	0.00926898	Down regulated
A_24_P203678	ACAT1	Coding Gene	9.98119	0.274404	8.88538	0.519336	0.00612457	Down regulated
A_33_P3244803	ACOX1	Coding Gene	13.793	0.616126	12.4881	0.468148	0.0111541	Down regulated
A_23_P131050	ACSBG2	Coding Gene	2.71843	0.297855	1.61602	1.2451	0.041771	Down regulated
A_23_P145681	ACTL6B	Coding Gene	4.96677	0.555141	6.14704	0.470205	0.0121259	Up regulated
A_32_P176018	ACTL8	Coding Gene	3.05186	1.11062	6.38219	0.636021	0.00269983	Up regulated
A_23_P148829	ACTRT2	Coding Gene	2.87014	0.678003	3.92428	0.248636	0.0185889	Up regulated
A_24_P300777	ADAM8	Coding Gene	10.129	0.364699	11.1685	0.498171	0.00942125	Up regulated
A_23_P321307	ADAMTS2	Coding Gene	2.14214	0.682914	1.13149	0.0226454	0.0187726	Down regulated
A_33_P3299220	ADAMTSL4	Coding Gene	4.43793	0.830888	5.50633	0.568371	0.0357716	Up regulated
A_33_P3245489	ADAMTSL5	Coding Gene	11.7326	0.407155	12.82	0.171827	0.00372135	Up regulated
A_23_P208400	ADCK4	Coding Gene	5.76261	0.809742	4.61024	0.144318	0.0211021	Down regulated
A_23_P501547	ADCY6	Coding Gene	8.43175	0.687242	7.2661	0.295961	0.0154354	Down regulated
A_24_P416177	ADCY7	Coding Gene	5.00218	0.766406	6.03097	0.187629	0.0248891	Up regulated
A_23_P30098	ADH4	Coding Gene	14.0308	0.791108	12.6436	0.819054	0.0239746	Down regulated
A_32_P52911	ADI1	Coding Gene	10.364	0.522704	9.09351	0.662827	0.0130443	Down regulated
A_23_P33326	ADRA1B	Coding Gene	7.26207	0.632443	5.50948	1.218	0.0185889	Down regulated
A_23_P76823	ADSSL1	Coding Gene	8.9735	0.731036	7.47452	0.877339	0.0193529	Down regulated
A_33_P3396008	AGER	Coding Gene	2.26827	0.699609	1.24343	0.340055	0.0230808	Down regulated
A_23_P136116	AGMO	Coding Gene	10.2111	0.755165	8.09962	1.43026	0.0177129	Down regulated
A_33_P3376493	AGTR2	Coding Gene	1.37354	0.108033	2.58099	0.742096	0.00860009	Up regulated
A_24_P63468	AGXT2	Coding Gene	3.12099	1.18515	1.6532	0.753241	0.0373139	Down regulated
A_33_P3213288	AIF1	Coding Gene	3.58257	0.958921	2.46007	0.774611	0.0475852	Down regulated
A_32_P44394	AIM2	Coding Gene	6.55104	0.825107	8.04976	1.19829	0.0323983	Up regulated
A_33_P3278590	AKAP14	Coding Gene	3.1699	0.805221	4.63912	0.513248	0.0150633	Up regulated
A_23_P208870	AKT2	Coding Gene	8.64818	0.37556	7.54687	0.14665	0.00240645	Down regulated
A_23_P217114	ALAD	Coding Gene	7.96383	0.534074	6.87094	0.290719	0.0098284	Down regulated
A_23_P32143	ALDOB	Coding Gene	16.4202	0.448142	15.4149	0.355478	0.0095984	Down regulated
A_21_P0000011	AMDHD2	Coding Gene	7.34952	0.673411	6.19098	0.487614	0.0187171	Down regulated
A_24_P199484	ANGPTL1	Coding Gene	3.01404	0.743564	1.77552	0.993976	0.0357143	Down regulated
A_23_P133068	ANK2	Coding Gene	4.06547	0.936732	5.27457	0.590504	0.033894	Up regulated
A_23_P202269	ANK3	Coding Gene	11.5902	0.632054	10.4168	0.617686	0.019783	Down regulated
A_23_P35725	ANO3	Coding Gene	3.81668	1.32345	1.99113	1.41759	0.0418464	Down regulated
A_23_P409093	ANO4	Coding Gene	4.5328	0.369836	3.0757	1.13886	0.0196369	Down regulated
A_24_P100996	ANO5	Coding Gene	7.56243	0.659121	6.49355	0.873943	0.0372619	Down regulated
A_21_P0010946	ANTXRLP1	Pseudo	1.90417	0.679271	3.6898	0.572374	0.00612457	Up regulated
A_32_P148345	ANXA2	Coding Gene	3.14334	0.863755	4.60792	1.13044	0.0331134	Up regulated
A_32_P105549	ANXA8L1	Coding Gene	6.11992	0.600993	4.26907	1.58002	0.0255361	Down regulated
A_33_P3344504	APBA2	Coding Gene	3.14666	1.02218	4.69443	1.05976	0.0332502	Up regulated
A_23_P101905	APC2	Coding Gene	3.30471	1.29658	4.75576	0.509786	0.0396307	Up regulated
A_23_P203191	APOA1	Coding Gene	16.3618	0.778984	14.3578	2.30225	0.0468715	Down regulated
A_24_P109214	APOC1	Coding Gene	8.32975	0.899967	9.4969	0.878496	0.0437473	Up regulated
A_33_P3223592	APOE	Coding Gene	12.4828	0.763122	13.8041	0.950582	0.0298096	Up regulated
A_23_P38244	APOH	Coding Gene	8.31022	0.700096	6.94826	0.78662	0.0200926	Down regulated
A_23_P166438	APOL5	Coding Gene	1.68016	0.426979	2.89449	0.888139	0.0200137	Up regulated
A_24_P941167	APOL6	Coding Gene	9.3987	0.42136	11.2924	0.501022	0.00121608	Up regulated
A_23_P126613	AQP10	Coding Gene	15.1664	0.736134	13.507	1.01119	0.0184018	Down regulated
A_33_P3209591	AQP3	Coding Gene	6.69115	0.811219	5.40107	0.470773	0.0200788	Down regulated
A_23_P112482	AQP3	Coding Gene	10.1078	0.575975	8.60564	0.32983	0.00470955	Down regulated
A_23_P98844	ARHGEF25	Coding Gene	4.19733	1.6954	2.06753	1.04624	0.0358491	Down regulated
A_33_P3416882	ARL9	Coding Gene	5.49284	0.861331	6.87352	0.677114	0.0235532	Up regulated
A_24_P386622	ARRB1	Coding Gene	7.71503	0.306782	6.05783	0.497965	0.00121608	Down regulated
A_23_P304304	ARSF	Coding Gene	3.7661	0.866053	4.87059	0.44319	0.0320551	Up regulated
A_23_P4161	ARSG	Coding Gene	3.51718	0.681951	4.68912	0.636501	0.0228784	Up regulated
A_33_P3298349	ART5	Coding Gene	2.28409	0.576218	1.09765	0.0400545	0.00726721	Down regulated
A_23_P119254	ASF1B	Coding Gene	6.72638	0.820263	7.87938	0.375948	0.0248891	Up regulated
A_24_P690811	ASPDH	Coding Gene	5.10629	0.702768	3.56646	0.473195	0.00926898	Down regulated
A_23_P76743	ASPG	Coding Gene	7.13493	0.590496	4.79343	1.51608	0.0128984	Down regulated
A_23_P91640	ASPHD2	Coding Gene	5.11085	0.641752	6.33137	0.655678	0.0194525	Up regulated
A_24_P245815	ASPHD2	Coding Gene	5.32588	0.342594	6.38116	0.571048	0.0107026	Up regulated
A_33_P3288159	ASPM	Coding Gene	5.19084	1.14569	6.47208	0.727154	0.0460812	Up regulated
A_23_P52017	ASPM	Coding Gene	8.20063	0.796437	9.4591	0.564585	0.0228784	Up regulated
A_33_P3371904	ASTN2	Coding Gene	4.00676	0.493798	2.48985	1.0385	0.0169715	Down regulated
A_24_P83738	ASTN2	Coding Gene	6.22452	0.216087	7.52196	0.475141	0.00210574	Up regulated
A_33_P3342830	ATP2A1	Coding Gene	2.43042	0.780853	1.19523	0.039337	0.0158577	Down regulated
A_24_P276932	ATP6V1C2	Coding Gene	4.42283	0.77802	5.53279	0.408466	0.0251615	Up regulated
A_23_P79108	ATP8B3	Coding Gene	1.97467	0.883175	3.44801	0.8631	0.0253896	Up regulated
A_23_P160537	AUNIP	Coding Gene	4.93951	0.847982	6.09103	0.414467	0.0273913	Up regulated
A_23_P50232	AURKC	Coding Gene	2.58543	0.644377	4.15651	0.923559	0.0158577	Up regulated
A_33_P3279353	AZU1	Coding Gene	1.53921	0.481042	5.32012	0.331164	2.5e-05	Up regulated
A_24_P228228	B4GALT6	Coding Gene	2.45382	0.813071	1.26829	0.0393519	0.0196243	Down regulated
A_33_P3240936	BACE1	Coding Gene	3.78362	1.09687	4.86227	0.262634	0.0489211	Up regulated
A_23_P10232	BANK1	Coding Gene	4.32181	1.73353	6.3881	1.05123	0.0394485	Up regulated
A_23_P13083	BARX2	Coding Gene	4.40024	1.00525	5.57948	0.845753	0.0486754	Up regulated
A_23_P128974	BATF	Coding Gene	8.95968	0.599992	10.2609	0.732703	0.0173958	Up regulated
A_23_P203841	BAZ2A	Coding Gene	7.29423	0.572563	6.15651	0.241166	0.00964326	Down regulated
A_24_P100761	BCAS3	Coding Gene	5.72136	0.272472	4.69655	0.505371	0.00708127	Down regulated
A_33_P3236628	BCKDHA	Coding Gene	3.48389	1.35201	1.97376	0.976183	0.0492184	Down regulated
A_33_P3254335	BEND4	Coding Gene	4.73748	0.526978	5.99779	0.493392	0.00942125	Up regulated
A_33_P3244808	BEST4	Coding Gene	10.0903	0.735871	9.00139	0.935958	0.0428835	Down regulated
A_23_P159316	BFSP2	Coding Gene	4.55805	1.517	6.45004	0.880995	0.0355594	Up regulated
A_33_P3245606	BHLHA9	Coding Gene	1.88679	0.618589	3.08107	0.810645	0.0248865	Up regulated
A_33_P3293913	BICC1	Coding Gene	3.47277	1.53797	1.65974	0.841469	0.0388567	Down regulated
A_33_P3256425	BICD1	Coding Gene	2.76614	0.910298	4.43825	0.183578	0.0109416	Up regulated
A_23_P118815	BIRC5	Coding Gene	10.1683	0.945429	11.4365	0.662225	0.0327967	Up regulated
A_23_P79769	BIRC7	Coding Gene	5.17749	0.798477	3.98353	0.265068	0.0200137	Down regulated
A_23_P88630	BLM	Coding Gene	6.56879	0.715924	7.70797	0.306145	0.0183153	Up regulated
A_23_P379649	BMF	Coding Gene	9.72875	0.441441	8.58347	0.885348	0.0234765	Down regulated
A_23_P68487	BMP7	Coding Gene	7.8269	0.566119	5.57807	0.618998	0.00202326	Down regulated
A_32_P780862	BMP8B	Coding Gene	6.00424	0.73008	4.12438	1.0466	0.0135113	Down regulated
A_23_P254797	BPIFB2	Coding Gene	3.98961	0.491093	5.31571	0.371857	0.00517741	Up regulated
A_23_P99452	BRCA2	Coding Gene	2.70313	0.947304	4.02902	0.947197	0.0383156	Up regulated
A_23_P15844	BRIP1	Coding Gene	4.06512	0.844409	5.10201	0.329138	0.0324107	Up regulated
A_33_P3273480	BRSK2	Coding Gene	4.27139	0.801517	3.23277	0.638048	0.0382277	Down regulated
A_33_P3232354	BTBD8	Coding Gene	3.41566	0.906846	2.36535	0.750523	0.0494462	Down regulated
A_23_P122439	BTN2A2	Coding Gene	5.74424	0.738781	6.88016	0.430189	0.0221714	Up regulated
A_23_P124417	BUB1	Coding Gene	6.38632	0.880468	7.84959	0.635508	0.020144	Up regulated
A_23_P163481	BUB1B	Coding Gene	6.36631	0.660698	7.57915	0.627645	0.0197933	Up regulated
A_24_P838483	C12orf74	Coding Gene	1.59701	0.320333	3.2528	1.80184	0.0373006	Up regulated
A_33_P3355708	C14orf180	Coding Gene	5.76122	1.51567	3.80554	1.295	0.0401798	Down regulated
A_23_P26557	C16orf59	Coding Gene	6.78896	0.903592	7.93663	0.457577	0.0322678	Up regulated
A_24_P712562	C17orf67	Coding Gene	7.22303	1.28002	5.44742	0.620384	0.0257445	Down regulated
A_33_P3393766	C17orf96	Coding Gene	4.7029	0.976776	5.89711	0.469762	0.0345355	Up regulated
A_33_P3384133	C17orf99	Coding Gene	3.36242	1.28642	4.79839	0.89389	0.0481662	Up regulated
A_21_P0009620	C18orf61	lnc	3.78176	0.870814	2.548	0.861218	0.0371849	Down regulated
A_23_P4922	C19orf68	Coding Gene	9.25795	0.324563	8.20088	0.477303	0.00696481	Down regulated
A_21_P0000177	C19orf83	Coding Gene	5.27042	0.858083	6.58782	0.703844	0.0265605	Up regulated
A_33_P3299081	C1orf159	Coding Gene	2.29033	0.824526	1.21974	0.0229749	0.0255361	Down regulated
A_32_P138032	C1orf61	Coding Gene	2.859	0.705101	3.88229	0.66	0.0334561	Up regulated
A_23_P400505	C1QTNF9	Coding Gene	2.92995	0.884571	1.88332	0.582696	0.0416282	Down regulated
A_33_P3357002	C1QTNF9B	Coding Gene	3.26394	1.38589	1.66753	0.52294	0.0372407	Down regulated
A_33_P3357007	C1QTNF9B	Coding Gene	3.00855	0.951281	1.32527	0.703329	0.0178303	Down regulated
A_33_P3404601	C2	Coding Gene	7.72381	0.37369	8.98243	0.866225	0.0160086	Up regulated
A_32_P162187	C2	Coding Gene	9.18261	0.397575	10.6217	0.883482	0.0121259	Up regulated
A_33_P3405459	C20orf195	Coding Gene	3.13917	0.95943	4.32452	0.554612	0.0360043	Up regulated
A_23_P132139	C21orf58	Coding Gene	6.81763	0.682378	8.32525	0.505955	0.00951362	Up regulated
A_22_P00002764	C21orf91-OT1	lnc	2.84473	0.872274	4.09286	0.598008	0.0280218	Up regulated
A_33_P3246258	C2CD2	Coding Gene	4.66924	0.545179	5.85349	1.12643	0.0367263	Up regulated
A_33_P3356462	C2CD4A	Coding Gene	3.42235	1.22404	5.01545	1.11444	0.0412751	Up regulated
A_23_P17130	C2orf88	Coding Gene	10.4414	0.637924	9.20751	0.627595	0.0180962	Down regulated
A_23_P42282	C4B	Coding Gene	8.66291	1.02789	10.3003	0.910758	0.0257445	Up regulated
A_23_P386268	C4orf26	Coding Gene	1.79392	0.626039	2.91431	1.12392	0.0442637	Up regulated
A_23_P153562	C5AR1	Coding Gene	2.40546	1.19578	3.84192	0.750041	0.0393478	Up regulated
A_24_P922631	C5orf58	Coding Gene	8.10344	0.967022	9.81486	0.313793	0.0128984	Up regulated
A_33_P3847514	C6orf141	Coding Gene	8.18434	0.769895	7.03608	0.947365	0.0406165	Down regulated
A_33_P3293202	C8orf37	Coding Gene	1.70376	0.565416	3.57155	0.974151	0.00931961	Up regulated
A_33_P3287997	C9orf106	lnc	3.32991	0.899646	4.43134	0.370162	0.0330572	Up regulated
A_23_P106656	CA7	Coding Gene	6.85976	0.898363	5.32056	1.00647	0.0272459	Down regulated
A_33_P3350566	CACNA1I	Coding Gene	4.70318	0.503389	3.58546	0.526197	0.0130443	Down regulated
A_23_P66180	CACNG3	Coding Gene	3.03864	0.8121	1.99989	0.620679	0.0383079	Down regulated
A_33_P3235568	CAPZB	Coding Gene	10.9975	0.31791	9.41869	0.249465	0.000347065	Down regulated
A_24_P192805	CARD17	Coding Gene	7.91193	0.81356	9.2716	0.45119	0.0175262	Up regulated
A_32_P86739	CASC10	Coding Gene	5.98228	0.898488	4.72946	0.816228	0.0359853	Down regulated
A_23_P100127	CASC5	Coding Gene	7.20034	0.793665	8.44461	0.624636	0.0248762	Up regulated
A_33_P3383236	CATIP	Coding Gene	2.64317	1.39082	1.28694	0.25033	0.0489351	Down regulated
A_23_P500741	CBFA2T3	Coding Gene	7.61432	0.790788	8.71877	0.978885	0.0471156	Up regulated
A_23_P166306	CBS	Coding Gene	10.7548	0.71726	9.6097	0.425157	0.0200788	Down regulated
A_33_P3238533	CCDC178	Coding Gene	4.35119	0.535232	3.31971	0.792129	0.0292292	Down regulated
A_23_P55270	CCL18	Coding Gene	7.38556	2.61285	10.2976	1.14044	0.0408101	Up regulated
A_23_P58321	CCNA2	Coding Gene	5.9935	0.705194	7.21752	0.657459	0.022353	Up regulated
A_23_P122197	CCNB1	Coding Gene	8.64216	0.953221	9.75794	0.716243	0.0454901	Up regulated
A_33_P3401621	CCNB1	Coding Gene	6.54158	0.591841	7.67843	0.552891	0.0174888	Up regulated
A_23_P65757	CCNB2	Coding Gene	9.29911	0.940061	10.3702	0.555405	0.0428835	Up regulated
A_23_P250302	CCR3	Coding Gene	3.57054	0.773312	4.88931	0.706373	0.0228784	Up regulated
A_33_P3381513	CD274	Coding Gene	2.84669	1.01793	4.29452	0.838724	0.031913	Up regulated
A_23_P338479	CD274	Coding Gene	3.66157	1.08413	5.34283	0.866062	0.0255361	Up regulated
A_23_P111583	CD36	Coding Gene	13.4725	0.513993	12.1019	0.517682	0.00721163	Down regulated
A_24_P82749	CD37	Coding Gene	6.69105	0.433471	8.04601	0.904157	0.0158577	Up regulated
A_33_P3375541	CD3D	Coding Gene	10.9714	0.6956	11.9778	0.484765	0.027688	Up regulated
A_23_P208310	CD3EAP	Coding Gene	5.7133	0.611976	6.72832	0.0878769	0.0143302	Up regulated
A_23_P98410	CD3G	Coding Gene	9.50803	0.59792	10.7141	0.443829	0.0126661	Up regulated
A_24_P295999	CD4	Coding Gene	11.2049	0.407724	12.2903	0.160878	0.0036612	Up regulated
A_24_P784765	CD59	Coding Gene	6.63887	0.569699	5.56817	0.815419	0.0294423	Down regulated
A_23_P126584	CD5L	Coding Gene	1.56269	0.792539	3.79715	0.944763	0.00782215	Up regulated
A_23_P311875	CD6	Coding Gene	8.34481	0.544852	9.46418	0.711362	0.0212083	Up regulated
A_23_P107735	CD79A	Coding Gene	11.7212	0.645512	12.9017	0.573565	0.0187414	Up regulated
A_32_P163247	CD8A	Coding Gene	9.53554	0.771202	10.8461	0.918527	0.0296117	Up regulated
A_33_P3228837	CD8A	Coding Gene	5.20288	0.537828	6.33517	0.804211	0.0240875	Up regulated
A_23_P149200	CDC20	Coding Gene	6.71679	0.750853	7.88857	0.647517	0.0265605	Up regulated
A_23_P57379	CDC45	Coding Gene	8.03263	0.783191	9.14062	0.336043	0.0240599	Up regulated
A_23_P148807	CDC7	Coding Gene	6.22714	0.471514	7.27695	0.356218	0.00942125	Up regulated
A_23_P104651	CDCA5	Coding Gene	8.63387	0.959046	9.66729	0.463675	0.0449741	Up regulated
A_33_P3251144	CDCA7L	Coding Gene	3.43644	0.652974	4.71747	0.697608	0.0187726	Up regulated
A_23_P40192	CDH22	Coding Gene	10.1582	0.561453	11.2949	0.228829	0.00926898	Up regulated
A_23_P217946	CDH23	Coding Gene	3.70762	0.744872	2.51549	0.953438	0.0368153	Down regulated
A_23_P307968	CDH23	Coding Gene	3.54352	0.591572	2.36376	0.898583	0.0278862	Down regulated
A_24_P382287	CDH7	Coding Gene	3.16651	0.984462	1.94612	0.784995	0.0418455	Down regulated
A_23_P202683	CDHR5	Coding Gene	14.3821	1.01959	13.2003	0.641383	0.0425076	Down regulated
A_24_P352388	CDHR5	Coding Gene	9.78079	0.74453	8.62564	0.476755	0.0226899	Down regulated
A_23_P138507	CDK1	Coding Gene	7.35094	0.781075	8.44542	0.612114	0.031913	Up regulated
A_33_P3341239	CDK16	Coding Gene	12.4198	0.29179	11.0029	0.309013	0.000558142	Down regulated
A_23_P20752	CDK20	Coding Gene	9.60081	0.612968	8.45227	0.850764	0.0286137	Down regulated
A_33_P3420442	CDK20	Coding Gene	7.05789	0.732678	5.88843	0.70896	0.0278535	Down regulated
A_33_P3329839	CDK2AP2	Coding Gene	12.8841	0.313861	13.9269	0.352935	0.00401052	Up regulated
A_23_P216812	CDKN2B	Coding Gene	6.17454	0.842163	4.94685	0.526678	0.0255361	Down regulated
A_33_P3387991	CEBPE	Coding Gene	7.91969	1.09386	9.25457	0.755411	0.0397182	Up regulated
A_33_P3323945	CEND1	Coding Gene	5.22136	0.70763	6.26556	0.708199	0.0342628	Up regulated
A_23_P257905	CENPB	Coding Gene	7.64923	0.498523	6.48216	0.371136	0.00799036	Down regulated
A_23_P253524	CENPE	Coding Gene	6.37471	0.789157	7.70421	0.634188	0.0211021	Up regulated
A_24_P96780	CENPF	Coding Gene	4.5708	1.40482	6.13693	0.783657	0.0437473	Up regulated
A_23_P401	CENPF	Coding Gene	9.02586	0.989316	10.4978	0.55972	0.0235415	Up regulated
A_24_P462899	CENPW	Coding Gene	7.36522	0.961698	8.65647	0.707965	0.0336459	Up regulated
A_23_P430201	CEP128	Coding Gene	5.14929	0.915108	6.1984	0.534528	0.0421094	Up regulated
A_23_P320829	CEP128	Coding Gene	4.13261	1.23989	5.67097	0.348625	0.0301095	Up regulated
A_33_P3291831	CEP55	Coding Gene	5.2302	1.24795	6.80667	0.729988	0.0344175	Up regulated
A_23_P115872	CEP55	Coding Gene	6.72037	1.00173	8.07706	0.774661	0.0340633	Up regulated
A_23_P49376	CETP	Coding Gene	2.72447	1.41258	4.45004	0.975859	0.0397182	Up regulated
A_32_P67526	CFAP221	Coding Gene	7.03089	0.266553	6.00008	0.581324	0.00942557	Down regulated
A_24_P85258	CFAP74	Coding Gene	2.17059	0.592335	1.14535	0.101258	0.0128431	Down regulated
A_33_P3227793	CGREF1	Coding Gene	9.67954	0.650862	8.47518	0.783832	0.0248762	Down regulated
A_23_P57306	CHAF1B	Coding Gene	7.0449	0.713444	8.23459	0.259821	0.015498	Up regulated
A_23_P137665	CHI3L1	Coding Gene	2.59086	1.29181	5.21872	1.93455	0.0258017	Up regulated
A_33_P3347528	CHIAP2	Pseudo	2.65215	0.876353	4.07817	1.1311	0.0359853	Up regulated
A_33_P3388501	CHIT1	Coding Gene	7.27267	0.475722	8.30773	0.951744	0.0346764	Up regulated
A_33_P3237894	CHN2	Coding Gene	4.52611	1.32021	3.02714	0.679916	0.0410676	Down regulated
A_24_P335202	CHRDL2	Coding Gene	2.78457	1.47497	5.01874	1.43274	0.0314812	Up regulated
A_33_P3367850	CHRM4	Coding Gene	2.9061	1.55535	5.15188	1.22619	0.0298096	Up regulated
A_23_P410717	CIART	Coding Gene	6.63752	1.3293	4.67284	0.709109	0.0234197	Down regulated
A_33_P3312301	CIT	Coding Gene	2.2206	0.794426	4.00727	0.621746	0.00942125	Up regulated
A_33_P3236403	CLASRP	Coding Gene	11.4969	0.505816	9.91888	0.955534	0.0130443	Down regulated
A_33_P3284036	CLDN14	Coding Gene	2.83593	1.60681	4.97784	0.899264	0.0298757	Up regulated
A_33_P3314401	CLDN16	Coding Gene	1.67519	0.574184	2.68162	0.907547	0.0390433	Up regulated
A_23_P380990	CLEC4F	Coding Gene	4.14724	0.790472	2.39853	0.788119	0.0128431	Down regulated
A_33_P3260572	CLIP4	Coding Gene	4.57594	1.22344	5.86405	0.474738	0.0448453	Up regulated
A_32_P20691	CLK3	Coding Gene	7.42289	0.633865	8.49119	0.144528	0.014009	Up regulated
A_33_P3267989	CLNK	Coding Gene	4.06786	0.607082	5.30245	0.774691	0.0211021	Up regulated
A_33_P3269803	CLSTN3	Coding Gene	9.70579	0.700115	8.29404	0.559194	0.0130443	Down regulated
A_23_P53724	CLSTN3	Coding Gene	3.92959	0.722946	2.00584	0.536453	0.00521253	Down regulated
A_24_P61753	CLUH	Coding Gene	7.9317	0.735225	6.56105	0.2063	0.0108391	Down regulated
A_23_P256413	CMTM7	Coding Gene	9.56012	0.447172	10.6735	0.418964	0.00833047	Up regulated
A_24_P142743	CNN2	Coding Gene	9.2571	0.842871	10.4962	0.531301	0.025222	Up regulated
A_33_P3216448	COL11A2	Coding Gene	5.92504	0.62173	7.44855	0.514927	0.00760336	Up regulated
A_33_P3304157	COL19A1	Coding Gene	1.58702	0.320477	2.61329	1.24347	0.0490016	Up regulated
A_33_P3395952	COL20A1	Coding Gene	2.85767	0.665443	3.9862	0.275264	0.015261	Up regulated
A_24_P257478	COL25A1	Coding Gene	6.97687	1.09999	4.03706	1.47639	0.0111438	Down regulated
A_24_P363896	COL27A1	Coding Gene	7.54045	0.608853	8.79207	0.754647	0.0199791	Up regulated
A_23_P360804	CPNE5	Coding Gene	9.98607	0.827706	11.27	0.876595	0.0322753	Up regulated
A_23_P58251	CPZ	Coding Gene	2.54565	0.959373	3.92823	0.17799	0.0204378	Up regulated
A_33_P3319126	CR1L	Coding Gene	1.23772	0.120432	2.59559	1.21171	0.0230784	Up regulated
A_24_P916656	CRCP	Coding Gene	6.27385	0.543372	4.97277	0.507478	0.00942125	Down regulated
A_33_P3325404	CRIP3	Coding Gene	5.63128	0.323621	3.90948	0.810466	0.00484861	Down regulated
A_23_P156562	CRIP3	Coding Gene	7.40016	0.589095	5.59551	0.566777	0.00428969	Down regulated
A_23_P305092	CRTAM	Coding Gene	4.29873	0.996955	5.61397	0.838273	0.0381999	Up regulated
A_24_P263284	CSMD2	Coding Gene	2.39463	1.05526	1.1354	0.0131192	0.0312115	Down regulated
A_23_P28263	CTDSP1	Coding Gene	13.7991	0.313641	12.6963	0.307654	0.00258892	Down regulated
A_33_P3396139	CTLA4	Coding Gene	4.30878	0.881657	5.97182	0.999496	0.0222316	Up regulated
A_24_P303091	CXCL10	Coding Gene	4.56128	1.37394	6.66268	1.63868	0.037632	Up regulated
A_33_P3343175	CXCL10	Coding Gene	4.50197	1.09932	6.43243	1.65831	0.0368092	Up regulated
A_23_P125278	CXCL11	Coding Gene	2.60358	1.13831	6.31719	2.97559	0.0222316	Up regulated
A_23_P18452	CXCL9	Coding Gene	6.96362	0.955855	9.41147	1.22748	0.0118316	Up regulated
A_33_P3375859	CXCR2P1	Pseudo	4.80592	1.13326	6.61711	1.004	0.0255588	Up regulated
A_23_P109913	CXCR6	Coding Gene	7.37995	0.453979	8.76953	0.761734	0.0110793	Up regulated
A_23_P12767	CYP2C9	Coding Gene	12.9161	0.612457	11.824	0.56403	0.0204378	Down regulated
A_33_P3251342	CYP3A4	Coding Gene	13.6186	0.576931	11.8619	1.32389	0.0200926	Down regulated
A_33_P3318117	CYP3A7	Coding Gene	10.0991	0.495861	8.6407	0.927303	0.0152181	Down regulated
A_33_P3303474	CYP4A11	Coding Gene	6.99993	1.07565	5.61632	1.00224	0.0430547	Down regulated
A_23_P114713	CYP4B1	Coding Gene	5.37485	1.19383	2.64115	1.63148	0.0174615	Down regulated
A_33_P3359017	CYP4F2	Coding Gene	11.816	0.960265	10.5112	0.647326	0.0312255	Down regulated
A_33_P3294277	CYP4F3	Coding Gene	11.5359	0.791168	10.2228	0.581341	0.0204542	Down regulated
A_24_P28811	CYP4F62P	Pseudo	7.38341	0.426918	8.51698	0.136077	0.00357604	Up regulated
A_24_P225961	DAG1	Coding Gene	7.36616	0.951566	5.7087	0.709471	0.0185889	Down regulated
A_33_P3413523	DBF4	Coding Gene	5.84981	0.918577	6.88074	0.320504	0.0387664	Up regulated
A_23_P104318	DDIT4	Coding Gene	9.82106	0.384558	8.59016	0.485671	0.00566953	Down regulated
A_33_P3356886	DENND2C	Coding Gene	1.18789	0.231946	2.67764	0.979307	0.0114228	Up regulated
A_23_P200310	DEPDC1	Coding Gene	7.40001	0.945571	8.55001	0.636242	0.0396307	Up regulated
A_33_P3221293	DFNA5	Coding Gene	8.02359	0.777831	6.26252	0.617726	0.00942125	Down regulated
A_23_P53198	DGAT2	Coding Gene	8.85908	0.568383	7.23429	1.36967	0.0255588	Down regulated
A_23_P20660	DIRAS2	Coding Gene	5.75876	0.967251	3.86809	1.96225	0.0441643	Down regulated
A_23_P88331	DLGAP5	Coding Gene	6.78671	0.930911	8.10346	0.76775	0.0322753	Up regulated
A_32_P228268	DNAH10	Coding Gene	3.47507	0.943864	1.74714	1.09384	0.0243093	Down regulated
A_23_P209519	DNAJB2	Coding Gene	6.50787	0.543993	5.00595	0.461215	0.00521529	Down regulated
A_23_P407074	DNM2	Coding Gene	10.4257	0.558777	9.39393	0.381349	0.0152005	Down regulated
A_24_P263653	DOCK2	Coding Gene	3.23278	1.06253	4.40674	0.476898	0.0418844	Up regulated
A_23_P125408	DOHH	Coding Gene	5.72063	0.356059	4.32567	0.580991	0.00475305	Down regulated
A_32_P121085	DOK3	Coding Gene	6.58063	0.723521	7.71945	0.932376	0.0383156	Up regulated
A_33_P3253144	DOK3	Coding Gene	7.4162	0.668377	8.47025	0.810109	0.0359244	Up regulated
A_24_P182494	DUSP10	Coding Gene	3.68675	0.941339	4.71895	0.488041	0.0441904	Up regulated
A_23_P104471	DUSP13	Coding Gene	1.39317	0.38679	2.8658	1.24475	0.0234197	Up regulated
A_24_P367602	DUSP5P1	Pseudo	1.30986	0.296867	2.4026	1.18642	0.0387868	Up regulated
A_33_P3373165	DUX4	Coding Gene	3.05102	0.698198	4.17565	0.530785	0.0228784	Up regulated
A_23_P347432	DVL1	Coding Gene	7.06644	0.568438	5.73645	0.232844	0.00574263	Down regulated
A_33_P3418516	E2F3	Coding Gene	3.5884	0.775239	6.13154	2.89997	0.0432183	Up regulated
A_23_P31721	E2F5	Coding Gene	5.72126	0.680664	7.03265	0.976156	0.0279228	Up regulated
A_33_P3318661	E2F7	Coding Gene	1.9688	1.08475	3.2944	0.440918	0.0330572	Up regulated
A_32_P210202	E2F7	Coding Gene	6.08907	0.983552	7.61888	0.434386	0.019388	Up regulated
A_24_P114032	EFNA3	Coding Gene	2.58212	0.775584	1.04129	0.0227549	0.00817055	Down regulated
A_23_P46936	EGR2	Coding Gene	4.53766	0.606389	5.78318	0.73676	0.019561	Up regulated
A_33_P3210848	ELFN1	Coding Gene	10.7216	0.28517	11.7248	0.247778	0.00214649	Up regulated
A_23_P122937	ELMO1	Coding Gene	5.40994	0.698922	6.47844	0.349217	0.0207422	Up regulated
A_23_P27315	EMILIN2	Coding Gene	8.70766	0.645668	9.8419	0.419258	0.0167589	Up regulated
A_23_P101297	EML2	Coding Gene	7.74566	0.404582	6.63467	0.54809	0.0103188	Down regulated
A_22_P00011711	EMX2OS	lnc	3.15225	0.716535	1.73919	0.842053	0.0204542	Down regulated
A_32_P107746	ENSA	Coding Gene	9.91771	0.402942	8.40946	0.450634	0.00247813	Down regulated
A_24_P257579	EPB41L4A	Coding Gene	5.34349	1.1059	6.50289	0.590823	0.0493695	Up regulated
A_33_P3321697	EPB41L4A	Coding Gene	6.81929	1.08554	8.04611	0.630244	0.0431849	Up regulated
A_23_P140675	EPB42	Coding Gene	2.99117	0.525114	1.88978	0.833812	0.0262245	Down regulated
A_23_P147822	EPS8L2	Coding Gene	10.7135	0.389343	9.66491	0.296621	0.00521253	Down regulated
A_24_P205045	ERC2	Coding Gene	1.76623	0.764734	3.35212	1.59597	0.0408101	Up regulated
A_23_P4679	ERF	Coding Gene	7.17342	0.312135	5.28346	0.12941	5.46e-05	Down regulated
A_33_P3243544	ESRRA	Coding Gene	9.86629	0.626598	8.3912	0.36117	0.00646979	Down regulated
A_24_P60441	EVC	Coding Gene	1.72755	0.644244	2.86875	1.19311	0.0475852	Up regulated
A_32_P141682	EVPLL	Coding Gene	7.14039	0.696339	5.3585	1.32151	0.0221835	Down regulated
A_33_P3226678	EVPLL	Coding Gene	5.32641	0.609462	4.07428	0.634124	0.0163061	Down regulated
A_23_P205177	F10	Coding Gene	8.70921	0.564622	7.01842	1.042	0.0140337	Down regulated
A_24_P558365	FABP12	Coding Gene	1.51751	0.200747	2.68435	1.30825	0.0390433	Up regulated
A_24_P211842	FADS6	Coding Gene	7.33068	0.803087	5.6591	1.1077	0.0223026	Down regulated
A_23_P138125	FAIM3	Coding Gene	5.04251	0.374616	6.05327	0.738685	0.0204542	Up regulated
A_24_P247536	FAM133B	Coding Gene	4.65304	0.561738	5.78569	0.197314	0.00906271	Up regulated
A_24_P185158	FAM134C	Coding Gene	8.18219	0.320797	7.15218	0.263127	0.00290438	Down regulated
A_33_P3260941	FAM168A	Coding Gene	1.28944	0.487209	2.68678	0.52571	0.00626964	Up regulated
A_23_P423074	FAM169A	Coding Gene	4.24191	1.33462	5.82087	0.359316	0.0332511	Up regulated
A_24_P595717	FAM179A	Coding Gene	1.90033	0.695202	3.26754	0.97132	0.0255467	Up regulated
A_33_P3333752	FAM183A	Coding Gene	2.45574	0.88039	1.39433	0.527811	0.0384141	Down regulated
A_23_P167818	FAM184A	Coding Gene	8.42044	0.540869	7.37548	0.971973	0.0381999	Down regulated
A_32_P332551	FAM216B	Coding Gene	1.53161	0.467492	3.48012	1.27543	0.0128984	Up regulated
A_22_P00002166	FAM229A	Coding Gene	11.7425	0.680587	13.3891	0.263933	0.00508716	Up regulated
A_23_P358394	FAM65B	Coding Gene	2.33474	1.09775	4.16214	1.05996	0.025222	Up regulated
A_23_P354288	FAM71A	Coding Gene	2.00619	0.682598	0.948454	0.0040937	0.0168361	Down regulated
A_32_P151800	FAM72D	Coding Gene	4.94623	0.901873	6.38937	0.43378	0.0185889	Up regulated
A_23_P314250	FAM78A	Coding Gene	7.53154	0.470607	8.57578	0.543916	0.0152005	Up regulated
A_23_P323751	FAM83D	Coding Gene	5.06061	0.810093	6.22519	0.739702	0.0335006	Up regulated
A_21_P0000791	FAM95A	lnc	2.44005	0.797692	1.37253	0.382802	0.0282172	Down regulated
A_23_P356021	FANCB	Coding Gene	3.28254	1.03721	4.4195	0.546597	0.0444678	Up regulated
A_23_P143994	FANCD2	Coding Gene	3.81203	0.958409	5.51979	0.522185	0.0148499	Up regulated
A_21_P0011966	FAR2P2	Pseudo	2.55994	0.962699	3.56839	0.259118	0.0431042	Up regulated
A_23_P81507	FAT2	Coding Gene	3.42418	0.866956	1.62753	0.900487	0.0158577	Down regulated
A_23_P168847	FBXO16	Coding Gene	5.27671	1.12379	6.79118	0.537829	0.027719	Up regulated
A_33_P3237235	FBXO44	Coding Gene	5.40004	0.53463	3.84001	0.423211	0.00401052	Down regulated
A_23_P160902	FCAMR	Coding Gene	2.0536	0.818479	3.61084	0.735766	0.0173958	Up regulated
A_33_P3364488	FCAMR	Coding Gene	6.17264	0.4135	7.38422	0.702192	0.0128431	Up regulated
A_23_P103765	FCER1A	Coding Gene	7.7816	1.00898	6.16102	0.691156	0.0214399	Down regulated
A_23_P63390	FCGR1B	Coding Gene	5.67077	1.12855	7.26301	0.90789	0.031922	Up regulated
A_23_P200728	FCGR3A	Coding Gene	7.21832	0.994285	8.99476	0.950932	0.0211021	Up regulated
A_33_P3335506	FCRL5	Coding Gene	7.65042	0.850043	8.93683	0.528186	0.0235415	Up regulated
A_33_P3262171	FER1L6	Coding Gene	4.24525	0.931705	6.2995	0.272295	0.00632679	Up regulated
A_33_P3401753	FFAR3	Coding Gene	3.46419	0.445999	1.74185	0.759086	0.0053287	Down regulated
A_24_P153840	FGD3	Coding Gene	8.16764	0.365848	9.26948	0.619975	0.0118531	Up regulated
A_23_P412389	FGF18	Coding Gene	4.81308	0.941923	3.3895	0.404554	0.0204137	Down regulated
A_33_P3297907	FGF22	Coding Gene	2.14008	0.570866	1.11147	0.0147957	0.0111438	Down regulated
A_23_P212830	FGFR3	Coding Gene	5.34629	1.01955	4.25708	0.564101	0.0479255	Down regulated
A_33_P3222391	FILIP1L	Coding Gene	3.27373	0.84424	1.91331	0.816808	0.0272439	Down regulated
A_22_P00023023	FLJ32255	lnc	4.4718	0.928764	5.97162	0.743081	0.0234765	Up regulated
A_22_P00002940	FLJ32255	lnc	6.29927	0.333801	7.60959	0.552847	0.00484861	Up regulated
A_33_P3272105	FLJ38576	lnc	2.79901	0.311673	1.23514	0.281426	0.000347065	Down regulated
A_21_P0014767	FLJ40288	lnc	2.33131	0.846586	1.21369	0.0846686	0.0249147	Down regulated
A_23_P140373	FLVCR2	Coding Gene	7.35262	0.489148	6.32457	0.499802	0.0152005	Down regulated
A_23_P233	FMO5	Coding Gene	9.67869	0.760828	8.54364	0.865179	0.0378562	Down regulated
A_33_P3249793	FOXO4	Coding Gene	4.01122	0.596606	2.07103	0.87156	0.00694028	Down regulated
A_24_P379165	FOXO4	Coding Gene	7.09222	0.569906	5.13862	0.577321	0.00305064	Down regulated
A_33_P3284019	FOXP4	Coding Gene	13.5498	0.274979	14.8224	0.187008	0.000347065	Up regulated
A_24_P623782	FRG2	Coding Gene	1.39289	0.100746	2.4088	0.572799	0.00655435	Up regulated
A_33_P3225022	FTCD	Coding Gene	8.19922	1.23901	5.50064	2.29375	0.0305619	Down regulated
A_23_P91552	FTCD	Coding Gene	8.15929	1.22109	5.9492	1.65106	0.0298096	Down regulated
A_23_P106887	FUS	Coding Gene	9.2458	0.408852	7.78959	0.293226	0.00162376	Down regulated
A_23_P373568	FUZ	Coding Gene	7.02063	0.280145	5.80417	0.180076	0.00045049	Down regulated
A_33_P3228466	FXYD3	Coding Gene	7.26013	0.64536	6.20689	0.530043	0.0234197	Down regulated
A_24_P4816	GABARAPL1	Coding Gene	8.82176	0.689312	7.58221	0.74774	0.023627	Down regulated
A_33_P3812669	GABARAPL1	Coding Gene	11.3904	0.495478	9.75079	0.703087	0.00612457	Down regulated
A_23_P159775	GABRE	Coding Gene	12.0337	0.737028	10.287	0.929321	0.014242	Down regulated
A_23_P67847	GALNT14	Coding Gene	8.13698	0.880752	9.32839	1.03692	0.0477139	Up regulated
A_33_P3360341	GATA3	Coding Gene	4.07381	0.854454	5.43539	0.759427	0.0257445	Up regulated
A_33_P3323822	GATAD2B	Coding Gene	5.83793	0.672957	4.83773	0.559748	0.0292292	Down regulated
A_23_P327777	GATS	Coding Gene	5.71591	0.868896	4.60153	0.334326	0.0294414	Down regulated
A_21_P0010537	GBP1P1	Pseudo	1.52078	0.415184	2.7595	0.889242	0.0187171	Up regulated
A_24_P45446	GBP4	Coding Gene	9.19192	0.168724	10.5269	0.922039	0.0125544	Up regulated
A_23_P74290	GBP5	Coding Gene	7.82485	0.280199	9.69031	0.935305	0.00518651	Up regulated
A_24_P182947	GCSAM	Coding Gene	3.34764	0.921219	4.76032	0.378749	0.0196743	Up regulated
A_23_P217498	GDPD2	Coding Gene	9.92746	0.427743	8.66628	0.987029	0.0223026	Down regulated
A_23_P154986	GGT1	Coding Gene	9.53118	0.478879	8.52482	0.510836	0.0158577	Down regulated
A_24_P42066	GGT3P	Pseudo	9.15677	0.511054	8.06338	0.55034	0.015261	Down regulated
A_23_P57236	GGT7	Coding Gene	5.79984	0.278479	4.29861	0.273007	0.000347065	Down regulated
A_24_P375322	GGT8P	Pseudo	9.07599	0.884137	7.83732	0.712872	0.0324107	Down regulated
A_32_P319200	GGTLC2	Coding Gene	10.0378	0.377771	8.9167	0.391941	0.00522976	Down regulated
A_33_P3391826	GHRH	Coding Gene	8.25553	0.953398	5.91168	1.92371	0.0265605	Down regulated
A_33_P3377100	GHRH	Coding Gene	7.31414	1.00534	4.62131	2.24307	0.0257861	Down regulated
A_33_P3340025	GINS1	Coding Gene	6.5978	0.672653	7.80149	0.500489	0.0174615	Up regulated
A_33_P3340040	GINS4	Coding Gene	5.91509	0.785373	7.08005	0.471003	0.0241154	Up regulated
A_23_P123596	GLDC	Coding Gene	6.27025	1.17491	7.65879	0.370234	0.034117	Up regulated
A_33_P3285715	GLI4	Coding Gene	12.6368	0.553871	13.9449	0.227673	0.00556485	Up regulated
A_33_P3379916	GLS	Coding Gene	10.6872	0.61031	9.55504	0.45275	0.0158577	Down regulated
A_32_P15958	ZNF295-AS1	AS	1.57445	0.611367	2.74278	0.753772	0.023627	Up regulated
A_33_P3409939	GNAT3	Coding Gene	1.85053	0.731812	3.62371	1.28133	0.0221714	Up regulated
A_23_P416581	GNAZ	Coding Gene	9.98577	0.488156	8.77372	0.516492	0.00964326	Down regulated
A_23_P123096	GNGT1	Coding Gene	1.20291	0.0737621	2.89515	1.48919	0.0221714	Up regulated
A_23_P22499	GNL3L	Coding Gene	7.28045	0.382083	8.66914	0.933233	0.0148499	Up regulated
A_33_P3271460	GOLGA1	Coding Gene	3.64128	0.581596	2.56126	0.497332	0.0175262	Down regulated
A_23_P134426	GPNMB	Coding Gene	8.44643	0.486719	9.62636	0.874787	0.0228977	Up regulated
A_23_P11070	GPR174	Coding Gene	4.38996	0.920929	5.74062	0.494738	0.0237555	Up regulated
A_33_P3301871	GPT	Coding Gene	8.85146	0.645781	7.68661	0.481035	0.0171337	Down regulated
A_23_P66732	GSG2	Coding Gene	2.25279	0.758658	3.83982	0.317728	0.00831204	Up regulated
A_23_P57588	GTSE1	Coding Gene	5.75159	1.22245	7.21648	0.625222	0.0368823	Up regulated
A_23_P63032	GUCA2B	Coding Gene	11.0011	0.69396	8.88457	1.17416	0.0114228	Down regulated
A_23_P332399	GULP1	Coding Gene	8.91794	0.80517	7.80351	0.77641	0.0381999	Down regulated
A_33_P3407324	GULP1	Coding Gene	8.1878	0.809835	6.88214	0.808294	0.0279968	Down regulated
A_33_P3341616	GVINP1	Pseudo	6.54719	0.594407	7.56177	0.766962	0.0322196	Up regulated
A_33_P3259393	HAPLN3	Coding Gene	6.75048	0.594652	8.31444	0.715856	0.00969193	Up regulated
A_33_P3385062	HAUS3	Coding Gene	4.35296	0.490954	5.7629	0.718415	0.0102887	Up regulated
A_32_P220770	HCG26	lnc	4.69999	0.639854	5.86735	0.677481	0.0223749	Up regulated
A_33_P3279640	HCN2	Coding Gene	12.4444	0.340117	13.6216	0.194509	0.00140124	Up regulated
A_24_P17870	HCP5	lnc	7.88631	0.501539	9.27888	0.798394	0.0130443	Up regulated
A_33_P3337831	HEATR1	Coding Gene	2.78908	1.17633	1.35499	0.20203	0.0302436	Down regulated
A_22_P00006710	HGC6.3	lnc	9.48067	0.797439	10.6664	0.461466	0.0237062	Up regulated
A_33_P3276713	HGF	Coding Gene	2.00161	0.723535	3.1074	0.932387	0.0405925	Up regulated
A_32_P221799	HIST1H2AM	Coding Gene	8.10922	0.728677	9.13775	0.447852	0.0273913	Up regulated
A_23_P93282	HIST1H3J	Coding Gene	6.45636	0.77324	7.48619	0.397635	0.0292292	Up regulated
A_33_P3257678	HIST2H3A	Coding Gene	10.0137	1.09226	11.3761	0.698842	0.0368928	Up regulated
A_33_P3807062	HJURP	Coding Gene	7.754	1.0156	9.01166	0.490618	0.0335449	Up regulated
A_23_P30736	HLA-DOB	Coding Gene	7.0599	0.795313	8.5159	1.27366	0.03631	Up regulated
A_33_P3293049	HLA-DQA1	Coding Gene	10.8135	0.65224	12.1113	1.05617	0.0306422	Up regulated
A_24_P852756	HLA-DQA2	Coding Gene	8.57212	0.430055	9.60148	0.288877	0.00679331	Up regulated
A_33_P3267865	HLA-J	Pseudo	7.42023	1.92993	9.71395	0.22702	0.0317948	Up regulated
A_33_P3400578	HLF	Coding Gene	5.97772	0.649016	4.30441	0.993651	0.0152181	Down regulated
A_33_P3211078	HMGA2	Coding Gene	7.56568	0.765305	8.84138	0.200475	0.0148421	Up regulated
A_23_P70007	HMMR	Coding Gene	7.56509	0.691695	8.71207	0.838628	0.031922	Up regulated
A_24_P136161	HNRNPCL1	Coding Gene	1.92704	0.583138	3.02842	0.699372	0.0235415	Up regulated
A_23_P153441	HOOK2	Coding Gene	11.135	0.517089	9.08595	0.194194	0.000473845	Down regulated
A_23_P428366	HORMAD2	Coding Gene	2.56108	1.01092	1.30671	0.033902	0.0286137	Down regulated
A_33_P3288649	HOXA10	Coding Gene	9.76507	1.09895	10.8293	0.114697	0.0489351	Up regulated
A_24_P911288	HPX-2	Coding Gene	2.83272	0.784609	4.13343	0.699178	0.0239257	Up regulated
A_23_P422911	HS6ST3	Coding Gene	4.18001	1.49891	2.1407	1.57886	0.0424485	Down regulated
A_33_P3418662	HSD17B3	Coding Gene	7.5939	0.592044	6.20346	1.09172	0.0255361	Down regulated
A_23_P43415	HSD17B3	Coding Gene	4.74174	0.676916	2.93954	1.42263	0.0239257	Down regulated
A_24_P150068	HTR3A	Coding Gene	2.44915	0.593499	3.46916	0.227422	0.0145286	Up regulated
A_23_P153320	ICAM1	Coding Gene	6.64279	0.651204	7.70858	0.519115	0.0228784	Up regulated
A_24_P270460	IFI27	Coding Gene	12.4113	0.609752	13.7152	0.921472	0.023627	Up regulated
A_23_P201459	IFI6	Coding Gene	9.84523	0.689291	11.2152	0.513032	0.0130443	Up regulated
A_23_P87545	IFITM3	Coding Gene	12.8873	0.534356	13.9436	0.373501	0.0128331	Up regulated
A_23_P151294	IFNG	Coding Gene	2.56134	1.13275	4.81084	2.12135	0.0382277	Up regulated
A_24_P19677	IFNLR1	Coding Gene	5.66201	0.749126	4.58483	0.774021	0.0373139	Down regulated
A_21_P0014026	IGANRP	Coding Gene	2.91167	1.36934	5.08993	1.39334	0.0294414	Up regulated
A_24_P382187	IGFBP4	Coding Gene	8.39152	0.284015	7.09833	0.553656	0.00418268	Down regulated
A_23_P383009	IGFBP5	Coding Gene	6.91881	1.27222	8.26022	0.509548	0.0449741	Up regulated
A_23_P142424	IGFLR1	Coding Gene	9.06613	1.49526	11.29	0.983193	0.0251917	Up regulated
A_23_P393713	IGHMBP2	Coding Gene	5.90811	0.67193	4.81	0.380575	0.0187171	Down regulated
A_22_P00009941	IKZF3	Coding Gene	10.524	0.445031	11.5596	0.66886	0.0191923	Up regulated
A_23_P376060	IKZF3	Coding Gene	4.82465	0.592647	5.99211	0.611508	0.0181387	Up regulated
A_24_P73599	IL16	Coding Gene	5.52887	0.364552	7.01762	0.616724	0.00445027	Up regulated
A_23_P166775	IL17RC	Coding Gene	8.22328	0.242196	7.11676	0.101557	0.000347065	Down regulated
A_23_P500206	IL17RE	Coding Gene	8.85309	0.469307	7.21482	0.624542	0.00470955	Down regulated
A_24_P227927	IL21R	Coding Gene	5.64711	0.373619	7.40932	0.870895	0.00600373	Up regulated
A_24_P230563	IL2RA	Coding Gene	4.15017	0.520206	5.35334	0.870394	0.0228784	Up regulated
A_23_P348028	IL36A	Coding Gene	2.08274	0.76644	0.968518	0.00543961	0.0196743	Down regulated
A_23_P5654	IL37	Coding Gene	2.92461	0.380875	3.92674	0.676434	0.0184782	Up regulated
A_23_P71037	IL6	Coding Gene	1.53312	0.4361	3.6577	0.51257	0.000703434	Up regulated
A_24_P141707	INHBE	Coding Gene	3.2357	0.508268	2.00147	0.855856	0.0203024	Down regulated
A_24_P284805	INPP5J	Coding Gene	7.09824	0.716839	6.09476	0.276176	0.0240599	Down regulated
A_33_P3334828	INSL3	Coding Gene	4.92402	0.538421	6.05216	0.854277	0.0262688	Up regulated
A_33_P3314794	IQCA1	Coding Gene	2.5505	1.18509	1.12069	0.127444	0.0305619	Down regulated
A_33_P3321293	IQGAP3	Coding Gene	8.49613	0.882478	9.67925	0.506705	0.0298096	Up regulated
A_33_P3256914	ITFG3	Coding Gene	9.75537	0.486822	8.51028	0.636459	0.0121259	Down regulated
A_23_P206806	ITGAL	Coding Gene	6.84253	0.525982	7.97469	0.763674	0.0221835	Up regulated
A_23_P312132	ITGAX	Coding Gene	5.79818	0.969121	7.31838	1.23934	0.0383079	Up regulated
A_24_P379820	ITM2C	Coding Gene	7.1655	0.923882	6.13941	0.594561	0.047024	Down regulated
A_23_P50674	IZUMO4	Coding Gene	3.58799	0.753068	2.14853	0.808748	0.0200788	Down regulated
A_24_P59667	JAK3	Coding Gene	9.54794	0.588682	11.0979	0.860898	0.0130443	Up regulated
A_23_P329112	JAK3	Coding Gene	3.75486	0.469461	5.00856	0.374887	0.00556485	Up regulated
A_33_P3221114	JAKMIP1	Coding Gene	3.02904	1.33743	5.13241	1.30887	0.0292292	Up regulated
A_21_P0000554	KALRN	Coding Gene	2.28103	0.574274	1.0362	0.0164857	0.00612457	Down regulated
A_24_P331830	KAZN	Coding Gene	3.81584	0.801539	2.71278	0.753391	0.0379235	Down regulated
A_24_P151	KCNAB2	Coding Gene	4.60441	0.749012	5.69894	0.645326	0.0310336	Up regulated
A_33_P3424062	KCNF1	Coding Gene	3.36118	1.03716	2.23527	0.269156	0.0398174	Down regulated
A_24_P387875	KCNJ10	Coding Gene	1.64714	0.449296	3.76696	1.53476	0.0156908	Up regulated
A_33_P3358277	KCNK1	Coding Gene	3.76277	0.680923	1.9214	0.646441	0.00641726	Down regulated
A_23_P65629	KCNK10	Coding Gene	9.66421	0.479434	8.51529	0.626092	0.0145479	Down regulated
A_32_P129862	KCNK10	Coding Gene	3.90629	0.498525	2.46972	0.854227	0.013387	Down regulated
A_33_P3256510	KCNK12	Coding Gene	6.11466	1.15193	7.84114	0.872235	0.0265605	Up regulated
A_33_P3213797	KCNK7	Coding Gene	3.44438	0.561578	2.01458	0.482271	0.00696481	Down regulated
A_33_P3413325	KCNMA1	Coding Gene	5.29036	0.837189	3.80909	1.08822	0.0298398	Down regulated
A_33_P3395823	KCNQ2	Coding Gene	8.17224	0.118937	9.83423	0.211338	1.22e-05	Up regulated
A_23_P44849	KCTD13	Coding Gene	3.70057	0.537177	2.55547	1.15755	0.0405466	Down regulated
A_23_P16157	KHSRP	Coding Gene	12.9384	0.58316	11.9345	0.444814	0.0194525	Down regulated
A_33_P3220723	KIAA0922	Coding Gene	6.39322	0.831081	7.58357	0.614401	0.0292605	Up regulated
A_33_P3309670	KIAA1211	Coding Gene	7.14309	0.895018	5.97483	0.19893	0.0260225	Down regulated
A_24_P227091	KIF11	Coding Gene	6.90278	0.800368	8.1514	0.568137	0.0235415	Up regulated
A_23_P386356	KIF12	Coding Gene	7.33743	0.650474	5.52375	0.620369	0.00593638	Down regulated
A_33_P3230548	KIF14	Coding Gene	4.93527	1.13955	6.49308	0.632141	0.0282498	Up regulated
A_23_P80902	KIF15	Coding Gene	6.5543	0.82852	7.7575	0.428199	0.0239938	Up regulated
A_33_P3242649	KIF18A	Coding Gene	3.1527	1.17875	4.78062	0.983927	0.0343487	Up regulated
A_23_P256956	KIF20A	Coding Gene	5.39621	1.0717	6.83851	0.719917	0.031913	Up regulated
A_33_P3311755	KIF23	Coding Gene	4.568	1.22476	5.93326	0.466077	0.0397182	Up regulated
A_23_P48835	KIF23	Coding Gene	7.27286	0.723729	8.4102	0.569516	0.02468	Up regulated
A_23_P148475	KIF4A	Coding Gene	5.59849	0.82679	7.01817	0.695012	0.0207422	Up regulated
A_33_P3414683	KIFC2	Coding Gene	3.61562	0.577184	2.58602	1.00986	0.0431042	Down regulated
A_33_P3377750	KLC3	Coding Gene	3.44606	0.66567	2.2949	0.773154	0.027719	Down regulated
A_23_P422766	KLHDC1	Coding Gene	5.70784	0.346629	4.40061	0.626641	0.00663989	Down regulated
A_23_P6535	KLHDC7B	Coding Gene	4.67732	0.81085	6.16795	0.69547	0.0181581	Up regulated
A_33_P3243702	KLHL30	Coding Gene	2.72312	1.0651	1.61245	0.183968	0.0423569	Down regulated
A_33_P3288491	KLHL38	Coding Gene	3.98529	0.499475	2.92237	0.45584	0.0128984	Down regulated
A_24_P944253	KLHL6	Coding Gene	6.31362	0.788899	7.45459	0.712136	0.0327967	Up regulated
A_23_P252236	KLKB1	Coding Gene	7.12335	0.764297	5.80347	0.790988	0.0248762	Down regulated
A_23_P204208	KLRD1	Coding Gene	4.90746	1.0963	6.2117	0.863069	0.0451066	Up regulated
A_21_P0000111	KLRF2	Coding Gene	3.69437	1.02111	1.50453	1.05047	0.0144576	Down regulated
A_23_P212258	KNG1	Coding Gene	3.98345	0.812599	2.49685	1.08621	0.0288892	Down regulated
A_24_P228149	KRT13	Coding Gene	3.23666	0.801981	2.04096	1.00891	0.0417904	Down regulated
A_23_P425925	KRT222	Coding Gene	6.27554	0.535645	4.71519	0.729598	0.00896405	Down regulated
A_23_P89665	KRT33B	Coding Gene	2.65265	0.621881	1.62716	0.228672	0.0158687	Down regulated
A_33_P3315303	KRT73	Coding Gene	8.87918	0.505038	10.1898	0.78915	0.0154205	Up regulated
A_22_P00008943	KRT81	Coding Gene	11.7486	0.492686	13.552	0.468737	0.00213556	Up regulated
A_33_P3354394	KRTAP12-4	Coding Gene	2.30917	0.846544	3.35936	0.680408	0.0418844	Up regulated
A_33_P3254579	KRTAP1-5	Coding Gene	2.26624	0.659587	1.22247	0.141403	0.0165702	Down regulated
A_33_P3317925	KRTAP20-4	Coding Gene	2.24189	0.627277	1.10119	0.0301524	0.0108391	Down regulated
A_23_P116942	LAG3	Coding Gene	8.56398	0.484636	9.67954	0.610418	0.0153173	Up regulated
A_23_P209129	LAIR2	Coding Gene	3.28385	0.843849	5.97934	2.71738	0.0346873	Up regulated
A_32_P313405	LAMA1	Coding Gene	9.50513	0.873924	7.94134	1.61217	0.046389	Down regulated
A_33_P3262560	LAMA3	Coding Gene	5.98242	0.807593	4.90161	0.702321	0.0379508	Down regulated
A_33_P3338413	LAMB4	Coding Gene	4.25209	1.52613	1.97798	0.92674	0.0240599	Down regulated
A_23_P29773	LAMP3	Coding Gene	6.94371	0.890805	8.11763	0.481016	0.0302779	Up regulated
A_33_P3364268	LBH	Coding Gene	5.69864	0.46111	6.7321	0.564858	0.0158577	Up regulated
A_22_P00011598	LBX2	Coding Gene	3.35974	0.945852	2.31116	0.549914	0.0450082	Down regulated
A_23_P404685	LCE1A	Coding Gene	10.3385	0.119865	11.4157	0.427724	0.00210574	Up regulated
A_23_P303891	LCE1C	Coding Gene	10.1337	0.360512	11.6366	0.372852	0.00128708	Up regulated
A_24_P696761	LEMD1	Coding Gene	5.24271	0.786845	2.87204	1.56952	0.0159339	Down regulated
A_23_P139198	LGALS12	Coding Gene	4.04465	0.76601	5.23833	0.705051	0.0282237	Up regulated
A_24_P164664	LGALS16	Coding Gene	1.36689	0.10722	2.41955	1.31134	0.0475852	Up regulated
A_33_P3223678	LHX3	Coding Gene	9.41007	0.517302	10.688	0.196419	0.00470955	Up regulated
A_24_P370172	LILRA5	Coding Gene	1.88743	0.65387	2.93288	0.527544	0.0240599	Up regulated
A_23_P74895	LIN28A	Coding Gene	1.78499	1.00748	2.97309	0.148656	0.0323983	Up regulated
A_33_P3302448	LINGO3	Coding Gene	1.46397	0.254422	2.61078	1.03736	0.0255361	Up regulated
A_23_P150931	LMBR1L	Coding Gene	9.10176	0.32677	7.56571	0.247531	0.000347065	Down regulated
A_23_P67725	LMNB2	Coding Gene	5.34864	0.974624	6.48919	0.389851	0.036297	Up regulated
A_23_P34452	LOR	Coding Gene	1.38108	0.341906	2.6649	1.40355	0.0390433	Up regulated
A_23_P146233	LPL	Coding Gene	5.07183	0.88712	8.03514	2.77306	0.0296093	Up regulated
A_32_P113066	LRAT	Coding Gene	7.7315	0.59688	5.96291	1.00028	0.0121259	Down regulated
A_23_P200222	LRP8	Coding Gene	3.54722	0.953647	4.866	0.265743	0.0235551	Up regulated
A_24_P737939	LRRC73	Coding Gene	7.89894	0.483752	6.64431	0.81628	0.0175262	Down regulated
A_24_P348203	LRRC8E	Coding Gene	4.41264	0.732482	3.14183	1.23418	0.0432917	Down regulated
A_33_P3238148	LRRD1	Coding Gene	2.33823	0.769955	1.13455	0.381539	0.0197933	Down regulated
A_33_P3232319	LRRD1	Coding Gene	1.64896	0.563334	3.1086	0.450128	0.00612457	Up regulated
A_23_P13382	LSP1	Coding Gene	10.6147	0.514331	11.8802	0.68429	0.0136686	Up regulated
A_22_P00025404	LSP1	Coding Gene	11.1535	0.656902	12.9019	0.669346	0.00732909	Up regulated
A_33_P3304655	LTBP1	Coding Gene	5.49243	0.492677	4.44611	0.932259	0.0334016	Down regulated
A_33_P3221084	LTBP3	Coding Gene	3.35157	1.23043	1.948	0.898686	0.0474122	Down regulated
A_33_P3368830	LY9	Coding Gene	7.00751	0.503766	8.13592	0.304802	0.0079543	Up regulated
A_33_P3418175	LYNX1	Coding Gene	2.92191	0.455935	1.7418	0.762013	0.0174583	Down regulated
A_33_P3418194	LYNX1	Coding Gene	9.11417	0.510228	10.3837	0.273086	0.00521253	Up regulated
A_24_P323148	LYPD5	Coding Gene	3.38053	1.12669	5.13606	0.489553	0.0192289	Up regulated
A_23_P79302	LYPD6B	Coding Gene	6.35794	0.56008	5.0568	1.39192	0.0428739	Down regulated
A_24_P164998	LYPD8	Coding Gene	6.13131	2.19451	2.88222	1.83605	0.0294423	Down regulated
A_23_P153616	MADCAM1	Coding Gene	5.55153	1.52707	7.4177	0.619235	0.0330572	Up regulated
A_23_P252928	MAGEA12	Coding Gene	1.62197	0.749383	2.93776	1.13996	0.0372407	Up regulated
A_23_P136870	MAGEA6	Coding Gene	6.50381	0.92726	5.39048	0.438188	0.0359853	Down regulated
A_33_P3300308	MAP1LC3A	Coding Gene	8.59155	0.286505	7.41197	0.139636	0.00045246	Down regulated
A_33_P3343090	MAP1S	Coding Gene	11.9212	0.615219	13.4123	0.381663	0.00612457	Up regulated
A_23_P5002	MAP4K1	Coding Gene	6.32001	0.250106	7.37518	0.628469	0.0101614	Up regulated
A_23_P131683	MAPRE3	Coding Gene	4.14554	0.561787	2.40705	0.521798	0.00398355	Down regulated
A_19_P00807752	MCF2L	Coding Gene	3.8552	1.08155	2.26517	0.957861	0.0312255	Down regulated
A_24_P336759	MCL1	Coding Gene	9.31389	0.534541	8.16156	0.316689	0.00906271	Down regulated
A_32_P103633	MCM2	Coding Gene	7.42787	0.869679	8.77524	0.356201	0.0192167	Up regulated
A_23_P370989	MCM4	Coding Gene	6.74611	0.582083	7.95588	0.366341	0.0101614	Up regulated
A_23_P27571	MCOLN1	Coding Gene	5.96591	0.364188	4.13072	0.630916	0.00210574	Down regulated
A_23_P23639	MCOLN2	Coding Gene	5.837	0.137901	6.95689	0.64333	0.00721163	Up regulated
A_23_P94422	MELK	Coding Gene	6.52072	0.706383	7.65143	0.518851	0.0228238	Up regulated
A_33_P3262555	MEX3D	Coding Gene	10.8781	0.336648	9.86339	0.342191	0.00497225	Down regulated
A_23_P39453	MEX3D	Coding Gene	8.95381	0.337966	10.0082	0.327575	0.00401052	Up regulated
A_24_P219474	MGAT5B	Coding Gene	2.47305	0.997915	3.57428	0.698741	0.0496403	Up regulated
A_23_P79572	MGC16025	Coding Gene	6.97672	1.28184	9.60797	0.566048	0.00922717	Up regulated
A_32_P111996	MGC39584	lnc	2.48363	1.20378	1.29509	0.0371282	0.0466437	Down regulated
A_21_P0014058	MGST3	Coding Gene	4.92913	0.977635	3.63521	0.356777	0.0270312	Down regulated
A_23_P2041	MICALCL	Coding Gene	7.55482	0.433333	6.55033	0.352488	0.00922717	Down regulated
A_23_P47806	MIP	Coding Gene	2.00091	0.832267	3.0456	0.711029	0.0426655	Up regulated
A_33_P3265111	MIR7-3HG	lnc	3.99266	0.924827	2.645	0.991443	0.0375525	Down regulated
A_22_P00000282	MIR940	lnc	7.12624	0.630352	8.49792	0.474531	0.0101246	Up regulated
A_33_P3374205	MKI67	Coding Gene	6.69303	1.09551	7.88738	0.533706	0.0438346	Up regulated
A_33_P3374210	MKI67	Coding Gene	8.03038	0.897755	9.48755	0.675965	0.0222963	Up regulated
A_24_P346855	MKI67	Coding Gene	4.42977	0.957911	5.96869	0.591099	0.0200788	Up regulated
A_22_P00009972	MKKS	Coding Gene	2.24469	0.543066	1.1154	0.032418	0.00700591	Down regulated
A_33_P3777207	MMEL1	Coding Gene	6.02886	0.834824	4.83661	0.691927	0.0318044	Down regulated
A_33_P3398331	MMP24	Coding Gene	8.70281	0.668748	6.86059	1.98486	0.0407595	Down regulated
A_23_P376557	MMP25	Coding Gene	6.30726	0.787818	7.73703	0.769133	0.0205742	Up regulated
A_23_P40174	MMP9	Coding Gene	8.92659	1.24031	10.4742	1.18817	0.0470529	Up regulated
A_24_P419028	MOP-1	Coding Gene	6.73696	0.311063	7.86974	0.195589	0.00121608	Up regulated
A_32_P49309	MRO	Coding Gene	5.98819	0.409169	4.86034	0.736924	0.0168361	Down regulated
A_21_P0014055	MROH1	Coding Gene	3.088	0.463559	1.73703	0.913366	0.0172716	Down regulated
A_33_P3227686	MROH5	Coding Gene	5.509	0.735663	7.58158	0.907025	0.00817055	Up regulated
A_33_P3357580	MRTO4	Coding Gene	6.8771	0.856608	8.09342	0.387072	0.0241154	Up regulated
A_33_P3350378	MS4A10	Coding Gene	14.605	0.620744	13.3962	0.931444	0.029125	Down regulated
A_23_P127760	MS4A12	Coding Gene	1.37059	0.333361	2.6459	1.44317	0.041702	Up regulated
A_33_P3402257	MS4A18	Coding Gene	7.78123	0.521466	9.31728	1.7253	0.04311	Up regulated
A_22_P00010205	MSH3	Coding Gene	8.13656	0.64845	9.43434	0.676372	0.0175262	Up regulated
A_23_P392942	MSR1	Coding Gene	3.35861	1.05631	4.55962	0.434711	0.0388219	Up regulated
A_21_P0000671	MT1E	Coding Gene	13.7978	0.719085	12.1336	1.54659	0.0340633	Down regulated
A_23_P420942	MT1E	Coding Gene	6.75304	0.930815	4.95333	0.95005	0.0186728	Down regulated
A_33_P3368313	MT1H	Coding Gene	11.3798	0.651658	9.25141	1.54753	0.0184599	Down regulated
A_33_P3315314	MT1HL1	Coding Gene	13.4882	0.647028	12.4864	0.976183	0.0476849	Down regulated
A_23_P66241	MT1M	Coding Gene	10.7023	0.592246	8.70452	1.54375	0.0200788	Down regulated
A_24_P25234	MTL5	Coding Gene	1.66073	0.779725	2.71126	0.567907	0.0331589	Up regulated
A_33_P3244784	MUC19	Coding Gene	1.52331	0.42391	2.57294	1.01468	0.0354745	Up regulated
A_23_P161399	MXI1	Coding Gene	8.63931	0.457229	7.46877	0.625625	0.0128984	Down regulated
A_23_P143190	MYBL2	Coding Gene	5.32564	0.64127	6.43917	0.464656	0.0184599	Up regulated
A_23_P38271	MYH2	Coding Gene	4.92999	0.851368	3.13888	1.95976	0.0465097	Down regulated
A_24_P151032	MYL4	Coding Gene	2.94039	0.759665	1.73839	0.815346	0.0312255	Down regulated
A_24_P255218	MYO5A	Coding Gene	7.17272	0.626123	8.33795	0.613601	0.0196919	Up regulated
A_24_P282309	MYOF	Coding Gene	4.78649	0.832627	5.85861	0.527452	0.0341759	Up regulated
A_33_P3334015	NATD1	Coding Gene	3.31171	0.486784	1.62035	0.669582	0.00507904	Down regulated
A_33_P3369393	NCF1	Coding Gene	9.58849	0.572802	10.6298	0.794187	0.0304896	Up regulated
A_23_P413224	NCR2	Coding Gene	3.84226	0.545734	2.26208	1.1858	0.0205192	Down regulated
A_23_P50108	NDC80	Coding Gene	8.17006	0.776816	9.36125	0.521378	0.0237004	Up regulated
A_33_P3300092	NDST1	Coding Gene	10.922	0.489347	9.59472	0.462937	0.00631689	Down regulated
A_33_P3347772	NEDD5	Coding Gene	7.82486	0.588803	9.50504	0.643519	0.00646979	Up regulated
A_33_P3368358	NEDD9	Coding Gene	7.2978	0.541838	6.2488	0.52463	0.0177129	Down regulated
A_23_P10025	NELL2	Coding Gene	10.0801	0.563715	8.87065	1.17173	0.0381348	Down regulated
A_23_P218626	NEU4	Coding Gene	9.53233	0.616846	8.16211	0.491013	0.00999566	Down regulated
A_23_P26583	NLRC5	Coding Gene	4.93374	0.824509	6.2409	0.775253	0.027688	Up regulated
A_23_P69699	NPY1R	Coding Gene	2.35392	0.714228	1.19208	0.331447	0.0175812	Down regulated
A_33_P3270429	NR1D2	Coding Gene	3.39079	1.07898	2.0078	1.04101	0.0444678	Down regulated
A_24_P943472	NR1D2	Coding Gene	7.14149	0.816622	5.88376	0.388447	0.0200788	Down regulated
A_33_P3409124	NR1D2	Coding Gene	5.78649	0.723118	4.72608	0.152859	0.0199791	Down regulated
A_23_P131208	NR4A2	Coding Gene	3.64296	0.440323	5.2007	0.958226	0.0124191	Up regulated
A_23_P165442	NRBP1	Coding Gene	9.53882	0.587127	8.24248	0.417064	0.00938683	Down regulated
A_23_P132856	NRROS	Coding Gene	2.86906	1.08879	4.11556	0.864837	0.0493917	Up regulated
A_23_P32064	NSMF	Coding Gene	7.55753	0.792107	5.75314	0.475346	0.00732909	Down regulated
A_23_P36882	NTS	Coding Gene	7.01505	0.954803	5.33276	1.50487	0.0385899	Down regulated
A_23_P414978	NUDT14	Coding Gene	7.97542	0.758508	6.82279	0.446515	0.0228784	Down regulated
A_33_P3246598	NUGGC	Coding Gene	5.22369	0.34946	6.69481	1.03642	0.015261	Up regulated
A_33_P3246593	NUGGC	Coding Gene	4.6243	0.479255	5.82586	0.508699	0.00942125	Up regulated
A_33_P3327300	NUMBL	Coding Gene	3.37665	0.575811	2.06196	0.732206	0.0158577	Down regulated
A_23_P212159	NUP210	Coding Gene	5.22282	1.12245	6.52858	0.372601	0.0357716	Up regulated
A_33_P3350488	NUSAP1	Coding Gene	7.88153	0.7605	9.04192	0.334232	0.0200788	Up regulated
A_33_P3308862	NUTM2B	Coding Gene	3.9999	1.19115	2.46818	1.28849	0.0490016	Down regulated
A_32_P799227	NUTM2B	Coding Gene	4.46795	0.84777	2.99147	1.15429	0.0327967	Down regulated
A_33_P3276207	NXPE3	Coding Gene	3.97754	1.19444	5.90028	0.473855	0.017418	Up regulated
A_24_P150931	NXPH3	Coding Gene	2.43789	0.848335	1.4019	0.535467	0.0383041	Down regulated
A_23_P137046	NYX	Coding Gene	8.72442	0.728656	10.541	0.747273	0.00937003	Up regulated
A_23_P204087	OAS2	Coding Gene	4.99325	0.80331	6.20957	1.17616	0.0481559	Up regulated
A_33_P3225512	OAS2	Coding Gene	5.17699	0.713314	6.37269	1.12955	0.0429461	Up regulated
A_33_P3225522	OAS2	Coding Gene	6.82264	0.632329	8.5061	0.478001	0.00522976	Up regulated
A_33_P3402489	OAS3	Coding Gene	3.14978	0.898489	4.60973	0.93441	0.0286976	Up regulated
A_24_P335305	OAS3	Coding Gene	7.11952	0.575999	8.59183	0.755265	0.0121709	Up regulated
A_33_P3350575	OC90	Coding Gene	2.96702	0.587896	1.36463	0.318734	0.00384192	Down regulated
A_23_P27917	OR10H1	Coding Gene	1.99996	0.59709	3.01213	0.780911	0.0331134	Up regulated
A_23_P13493	OR51E1	Coding Gene	3.35909	1.07349	4.8511	0.106096	0.0222316	Up regulated
A_23_P36203	OR52B2	Coding Gene	2.25223	0.451125	1.12073	0.0264506	0.00380005	Down regulated
A_33_P3306342	OR52N5	Coding Gene	1.73421	0.548916	2.91895	0.382635	0.00969193	Up regulated
A_23_P45799	ORC1	Coding Gene	3.09894	1.30088	4.98874	0.347364	0.0205742	Up regulated
A_23_P321935	OSBP2	Coding Gene	6.83475	0.783021	5.48928	0.672661	0.0211483	Down regulated
A_23_P57474	OSBP2	Coding Gene	4.27067	0.48077	2.23726	0.922702	0.00521253	Down regulated
A_33_P3277373	OSM	Coding Gene	3.23086	0.511665	1.58227	0.667147	0.00588775	Down regulated
A_33_P3226099	OTOP2	Coding Gene	5.43376	0.387161	3.80266	0.679254	0.00428969	Down regulated
A_23_P433785	P2RX5	Coding Gene	5.69982	0.58467	7.02224	1.17186	0.031922	Up regulated
A_23_P48307	PABPC3	Coding Gene	7.825	0.459164	9.01593	0.356726	0.00600373	Up regulated
A_23_P258088	PACSIN1	Coding Gene	4.3556	1.43666	6.08097	0.878613	0.0390299	Up regulated
A_24_P381136	PACSIN3	Coding Gene	3.82186	0.871559	2.67104	0.673937	0.0360043	Down regulated
A_32_P109683	PAGE2B	Coding Gene	2.35093	0.745894	1.31999	0.32149	0.0253896	Down regulated
A_33_P3258056	PALM3	Coding Gene	5.07833	0.950462	2.60786	0.636219	0.00521253	Down regulated
A_33_P3901921	PARPBP	Coding Gene	3.37552	1.02624	4.51978	0.742203	0.0494388	Up regulated
A_24_P126484	PBLD	Coding Gene	6.32441	0.918934	4.98038	0.854744	0.0327967	Down regulated
A_33_P3262927	PCBP4	Coding Gene	6.7843	0.706559	5.64067	0.336969	0.0180962	Down regulated
A_33_P3258546	PCDHA5	Coding Gene	4.12519	1.27422	2.29645	0.752943	0.0256285	Down regulated
A_23_P408249	PCK1	Coding Gene	12.6257	0.570044	11.5932	1.02759	0.0435227	Down regulated
A_32_P142440	PCSK9	Coding Gene	3.92785	1.21801	5.81287	1.68022	0.0428603	Up regulated
A_21_P0011303	PDCD6IPP2	Pseudo	10.2152	0.484313	9.15553	0.318628	0.0092674	Down regulated
A_33_P3341105	PDE6G	Coding Gene	6.83526	0.487674	7.95006	0.47902	0.0115392	Up regulated
A_21_P0000146	PDK2	Coding Gene	8.03556	0.534801	6.81915	0.408868	0.00924224	Down regulated
A_33_P3311371	PDLIM2	Coding Gene	9.0177	0.420287	7.09394	0.268082	0.000347065	Down regulated
A_33_P3384562	PDLIM7	Coding Gene	7.74865	0.225481	8.75497	0.340431	0.0023205	Up regulated
A_24_P299685	PDPN	Coding Gene	4.55505	1.01917	6.07369	0.699876	0.0255361	Up regulated
A_23_P35977	PDZD3	Coding Gene	11.6319	0.573885	10.5962	0.657169	0.0248865	Down regulated
A_23_P89589	PER1	Coding Gene	8.37098	0.890114	6.76299	0.804107	0.0196743	Down regulated
A_24_P291231	PER3	Coding Gene	6.26868	0.712954	4.85967	0.761328	0.0185889	Down regulated
A_23_P350059	PFN1P2	Pseudo	8.47022	0.349541	9.59959	0.335404	0.0036612	Up regulated
A_33_P3221111	PGA4	Coding Gene	3.91781	0.617227	5.22165	0.777609	0.019099	Up regulated
A_23_P401904	PHF19	Coding Gene	8.49353	0.811194	9.57526	0.520505	0.0318642	Up regulated
A_23_P433229	PHYHIP	Coding Gene	4.75115	0.902548	3.69919	0.427737	0.0382277	Down regulated
A_24_P379104	PIM2	Coding Gene	10.1257	0.814028	11.3309	0.5709	0.0260067	Up regulated
A_21_P0011419	PKD1	Coding Gene	3.33366	0.282455	2.18136	0.931394	0.0205465	Down regulated
A_23_P12554	PKD2L1	Coding Gene	4.20743	0.546326	5.31541	0.675894	0.0203935	Up regulated
A_23_P145529	PKIB	Coding Gene	9.32889	0.809039	7.11151	1.22167	0.0126661	Down regulated
A_33_P3397443	PKMYT1	Coding Gene	8.6802	0.665138	9.86546	0.457919	0.0167049	Up regulated
A_23_P23296	PKP1	Coding Gene	2.12943	0.688977	1.03049	0.0249151	0.0156788	Down regulated
A_33_P3241989	PLAC8	Coding Gene	3.36063	1.08042	2.15998	0.742436	0.0483512	Down regulated
A_23_P118174	PLK1	Coding Gene	5.1767	0.678132	6.56399	0.669326	0.0156908	Up regulated
A_23_P43763	PLLP	Coding Gene	7.27742	0.884547	5.86638	0.996487	0.0322579	Down regulated
A_23_P253321	PNOC	Coding Gene	7.47108	1.02864	8.69815	0.68082	0.0408101	Up regulated
A_23_P17914	PNPLA3	Coding Gene	5.68943	0.857479	7.26698	0.489951	0.0136686	Up regulated
A_33_P3559060	PNPLA5	Coding Gene	2.96679	0.676168	1.75187	0.49278	0.0170034	Down regulated
A_33_P3338047	PNPLA7	Coding Gene	3.4908	0.436387	1.48582	0.152551	0.000347065	Down regulated
A_33_P3391097	POLM	Coding Gene	3.05442	0.9486	1.94448	0.442305	0.0378463	Down regulated
A_23_P218827	POLQ	Coding Gene	5.89343	0.766936	7.02791	0.34367	0.0221714	Up regulated
A_33_P3220422	POM121L12	Coding Gene	9.49746	0.469738	8.32229	0.94518	0.0255361	Down regulated
A_23_P312920	POU2AF1	Coding Gene	10.5295	0.956326	11.6052	0.532454	0.0430413	Up regulated
A_23_P59138	POU5F1	Coding Gene	10.5188	0.765011	9.35187	0.432731	0.0222316	Down regulated
A_24_P144601	POU5F1	Coding Gene	6.59601	0.757864	4.95349	0.367766	0.00790028	Down regulated
A_23_P252062	PPARG	Coding Gene	10.0618	0.542203	8.87766	0.839732	0.0234197	Down regulated
A_33_P3337009	PPCS	Coding Gene	6.28776	0.227558	7.3791	0.43872	0.00357604	Up regulated
A_33_P3344673	PPP1R37	Coding Gene	4.67963	0.385029	2.33839	0.992978	0.00328987	Down regulated
A_33_P3397768	PPP6R2	Coding Gene	3.05019	1.09048	1.76771	0.777351	0.0435931	Down regulated
A_23_P116890	PRB3	Coding Gene	6.34414	0.744072	7.4592	0.246415	0.0199552	Up regulated
A_23_P206059	PRC1	Coding Gene	8.50741	0.727351	9.59459	0.491978	0.0252085	Up regulated
A_23_P413641	PREX1	Coding Gene	9.31656	0.237339	10.3456	0.589142	0.00926898	Up regulated
A_23_P1473	PRF1	Coding Gene	4.67696	0.196111	5.83976	0.800447	0.0129184	Up regulated
A_23_P420281	PRKCB	Coding Gene	4.0477	0.858258	5.07698	0.456613	0.0372897	Up regulated
A_23_P106016	PRKD1	Coding Gene	7.22636	0.586246	6.03265	0.976725	0.0302779	Down regulated
A_23_P40096	PROC	Coding Gene	4.29255	1.36648	2.49399	0.818575	0.0318292	Down regulated
A_33_P3239295	PRODH	Coding Gene	6.97602	0.549745	5.44679	0.816605	0.0118133	Down regulated
A_33_P3403075	PRR11	Coding Gene	5.1216	1.07894	6.62048	0.718142	0.0295323	Up regulated
A_23_P387537	PRRG3	Coding Gene	3.41868	0.865738	2.08442	0.869932	0.0312255	Down regulated
A_33_P3336944	PRSS55	Coding Gene	1.32775	0.0953376	2.49268	1.48547	0.0497066	Up regulated
A_33_P3382999	PSAPL1	Coding Gene	4.40603	2.56332	0.957705	0.00370736	0.0236806	Down regulated
A_24_P289726	PSMD3	Coding Gene	8.96871	0.377602	7.83497	0.153984	0.00214649	Down regulated
A_23_P4808	PTGER1	Coding Gene	4.03189	0.603603	5.04015	0.348531	0.0180422	Up regulated
A_23_P167030	PTH1R	Coding Gene	3.8646	0.68775	2.3583	1.05505	0.0228784	Down regulated
A_33_P3333038	PTMS	Coding Gene	13.9624	0.327823	15.5687	0.267709	0.000347065	Up regulated
A_33_P3489228	PTPN20B	Coding Gene	2.92792	1.17195	4.19964	0.692522	0.0475852	Up regulated
A_24_P409519	PTPN5	Coding Gene	3.38011	1.06543	1.41005	0.515001	0.012765	Down regulated
A_33_P3364821	PTPRC	Coding Gene	10.0118	0.664117	11.0648	0.643082	0.0283519	Up regulated
A_23_P7636	PTTG1	Coding Gene	10.8779	0.846125	11.9736	0.485059	0.0322913	Up regulated
A_33_P3351745	PVRIG	Coding Gene	8.35498	0.454975	9.43861	0.701441	0.0187171	Up regulated
A_19_P00317180	PVT1	lnc	4.0976	0.621839	5.1001	0.617416	0.0278535	Up regulated
A_33_P3357748	PVT1	lnc	5.22615	0.313609	6.27098	0.85279	0.0228784	Up regulated
A_19_P00316753	PVT1	lnc	6.37272	0.297598	7.54543	0.69535	0.0106151	Up regulated
A_23_P130194	PYCR1	Coding Gene	10.5192	1.10039	11.7747	0.365515	0.0372407	Up regulated
A_23_P5778	RAB17	Coding Gene	9.26218	0.433414	7.94685	0.273165	0.0027359	Down regulated
A_23_P74115	RAD54L	Coding Gene	7.66682	0.882721	8.78996	0.469967	0.0326449	Up regulated
A_21_P0013163	RAET1K	Pseudo	3.51868	0.819749	4.57525	0.492724	0.0332219	Up regulated
A_23_P92727	RAI14	Coding Gene	7.94891	0.601456	6.88765	0.971139	0.0396307	Down regulated
A_23_P135184	RALGDS	Coding Gene	8.5043	0.655296	6.8081	0.611228	0.00721163	Down regulated
A_23_P304237	RAPGEF1	Coding Gene	6.55071	0.469919	4.87086	0.274091	0.00121608	Down regulated
A_33_P3421571	RAPH1	Coding Gene	12.0812	1.00989	13.5735	0.580395	0.0239938	Up regulated
A_33_P3412143	RASSF10	Coding Gene	3.89715	0.292288	2.33308	1.12619	0.0150091	Down regulated
A_24_P336584	RASSF5	Coding Gene	4.89029	0.67284	5.98602	0.629814	0.0256101	Up regulated
A_24_P276102	RBL1	Coding Gene	1.77045	0.539805	2.98639	1.13803	0.0350642	Up regulated
A_33_P3278941	REC8	Coding Gene	10.1863	0.494422	11.6436	1.19388	0.0240875	Up regulated
A_23_P96285	REEP1	Coding Gene	6.77827	0.518271	5.71531	0.486567	0.0148499	Down regulated
A_32_P65628	REG3G	Coding Gene	8.83978	1.61015	10.6274	0.963184	0.0454921	Up regulated
A_24_P59236	RESP18	Coding Gene	1.94844	0.66519	3.09919	0.68181	0.0243823	Up regulated
A_23_P209944	RETSAT	Coding Gene	10.1289	0.524265	8.89644	0.476809	0.00957093	Down regulated
A_33_P3312682	REXO1	Coding Gene	12.0335	0.16427	13.3909	0.377588	0.000427903	Up regulated
A_23_P73097	RGS20	Coding Gene	1.5602	0.463908	3.38316	2.10338	0.0429972	Up regulated
A_23_P26468	RHBDL1	Coding Gene	9.29795	0.466937	11.0905	0.252158	0.000703434	Up regulated
A_23_P20427	RHOBTB2	Coding Gene	8.66802	0.370119	7.62855	0.941057	0.0296093	Down regulated
A_23_P154962	RIMBP3	Coding Gene	6.20825	0.636023	7.21643	0.711342	0.0324107	Up regulated
A_32_P38645	RIMS4	Coding Gene	3.03455	1.17984	1.59888	0.802102	0.0397182	Down regulated
A_33_P3236591	RLTPR	Coding Gene	8.52373	0.204603	9.6621	0.530811	0.00465918	Up regulated
A_33_P3261937	RNASE13	Coding Gene	4.97983	0.809604	6.47394	0.335862	0.0121259	Up regulated
A_33_P3270102	RNF126	Coding Gene	7.51735	0.395912	8.54098	0.471732	0.0101246	Up regulated
A_24_P383459	RNF157	Coding Gene	3.83415	0.644441	2.68657	1.18918	0.0468715	Down regulated
A_23_P385500	RNF166	Coding Gene	1.93497	0.576479	3.15583	0.555666	0.0137541	Up regulated
A_33_P3326046	RNF167	Coding Gene	9.77799	0.256842	8.63519	0.447792	0.00365365	Down regulated
A_23_P399255	RNF182	Coding Gene	1.76889	0.951709	3.72521	1.67842	0.0322913	Up regulated
A_23_P204158	RNFT2	Coding Gene	4.98397	0.823755	6.15467	0.720407	0.0332219	Up regulated
A_24_P23445	RNU12	lnc	7.51552	1.17472	6.3227	0.437258	0.0481559	Down regulated
A_33_P3278877	ROBO2	Coding Gene	1.89088	0.723676	3.43476	0.860262	0.0174247	Up regulated
A_23_P12363	ROR1	Coding Gene	6.42623	0.863529	7.5011	0.179571	0.0292292	Up regulated
A_33_P3386671	RORC	Coding Gene	10.7667	0.328711	9.41971	0.417635	0.00214649	Down regulated
A_33_P3209254	RPS16P5	Pseudo	3.68645	0.792301	5.01046	0.683842	0.0228784	Up regulated
A_24_P55225	RSPH9	Coding Gene	4.8451	0.879619	6.64133	0.723983	0.0130443	Up regulated
A_24_P13041	RTKN2	Coding Gene	4.39479	0.898057	5.75778	0.569872	0.0236035	Up regulated
A_24_P221575	RUFY3	Coding Gene	2.48624	0.795504	3.55072	0.920236	0.0480129	Up regulated
A_33_P3221748	RUNX3	Coding Gene	10.3378	0.521831	11.392	0.603973	0.0192289	Up regulated
A_23_P124619	S100A14	Coding Gene	13.1677	0.462616	12.0005	0.304479	0.00571077	Down regulated
A_33_P3281273	S1PR4	Coding Gene	9.1371	0.507144	10.5818	0.874669	0.0143087	Up regulated
A_24_P335092	SAA1	Coding Gene	2.82083	1.27574	5.17543	1.85093	0.0312255	Up regulated
A_33_P3408918	SAA2	Coding Gene	3.41274	0.947171	6.21802	1.83362	0.0158577	Up regulated
A_24_P35400	SARDH	Coding Gene	3.07215	0.907451	4.27539	0.521008	0.0306422	Up regulated
A_23_P163408	SCAPER	Coding Gene	7.30827	0.70921	6.23281	0.410489	0.0228784	Down regulated
A_32_P37592	SCARNA17	lnc	13.8139	0.70872	12.5935	0.742194	0.0252085	Down regulated
A_33_P3737979	SCARNA23	lnc	2.09698	0.973201	3.96455	0.440079	0.0111541	Up regulated
A_33_P3408514	SCNN1D	Coding Gene	3.95857	0.464779	2.93776	0.571879	0.0168361	Down regulated
A_23_P104594	SCT	Coding Gene	11.03	0.562617	9.54942	0.642177	0.0092674	Down regulated
A_33_P3417487	SCUBE1	Coding Gene	3.84802	0.728456	2.76144	0.944381	0.0430108	Down regulated
A_24_P317708	SDR16C5	Coding Gene	5.72	0.581994	3.65157	2.11443	0.0346881	Down regulated
A_23_P51918	SEC16B	Coding Gene	8.89823	0.568534	7.72631	0.419503	0.0118531	Down regulated
A_33_P3400273	SELL	Coding Gene	3.9954	1.50519	5.8883	1.45648	0.046648	Up regulated
A_33_P3339100	SELP	Coding Gene	4.76973	0.889775	5.85064	0.551511	0.0383156	Up regulated
A_33_P3258265	SEMA6C	Coding Gene	5.9194	0.715575	4.53141	0.627552	0.0159339	Down regulated
A_23_P106389	SEMA7A	Coding Gene	3.52101	0.989709	5.16898	1.13751	0.0298096	Up regulated
A_24_P158089	SERPINE1	Coding Gene	2.75752	0.961536	1.44774	0.546806	0.0289	Down regulated
A_23_P89270	SERPINF2	Coding Gene	2.36958	0.624128	1.26676	0.33249	0.0150091	Down regulated
A_23_P433111	SETD9	Coding Gene	8.5678	1.04164	7.18692	1.05432	0.0431284	Down regulated
A_24_P417460	SFMBT2	Coding Gene	4.05141	0.94812	5.84256	1.40572	0.0305107	Up regulated
A_24_P223874	SFTPA1	Coding Gene	3.87454	0.797394	1.99687	0.640708	0.00852068	Down regulated
A_33_P3344574	SFTPA2	Coding Gene	9.27183	0.513587	11.1737	0.767159	0.00477512	Up regulated
A_23_P202138	SFXN3	Coding Gene	10.48	0.474745	9.39804	0.480324	0.0120339	Down regulated
A_23_P19673	SGK1	Coding Gene	12.127	0.807546	11.0654	0.61109	0.0360043	Down regulated
A_23_P411335	SGOL2	Coding Gene	5.22035	0.912542	6.45896	0.611711	0.0312255	Up regulated
A_24_P941217	SGPP2	Coding Gene	5.69572	0.558717	6.96471	0.907654	0.0228784	Up regulated
A_33_P3333436	SGSM3	Coding Gene	3.45371	0.998158	2.23061	0.735014	0.0408049	Down regulated
A_24_P203103	SH2D1A	Coding Gene	3.95455	1.0858	5.25554	0.618101	0.0382277	Up regulated
A_33_P3283619	SH2D1A	Coding Gene	5.52238	1.16145	7.08561	0.893088	0.0344175	Up regulated
A_23_P160618	SH2D2A	Coding Gene	8.55848	0.351771	9.57615	0.427896	0.00727958	Up regulated
A_33_P3313730	SH3BP2	Coding Gene	4.61982	1.09729	2.10104	0.88206	0.00926898	Down regulated
A_33_P3318606	SHC2	Coding Gene	5.49843	0.633409	3.8375	1.313	0.0240875	Down regulated
A_32_P96719	SHCBP1	Coding Gene	3.94517	1.35921	5.82166	0.363863	0.0235532	Up regulated
A_23_P390443	SHISA7	Coding Gene	2.81149	0.569595	4.08987	0.57129	0.0123908	Up regulated
A_23_P406521	SIRPD	Coding Gene	3.0273	0.826557	1.32709	0.424718	0.00942125	Down regulated
A_23_P28857	SIRPG	Coding Gene	7.91612	0.536929	9.42934	0.827825	0.0121185	Up regulated
A_23_P28120	SIX2	Coding Gene	1.79717	0.670768	3.01765	0.927988	0.0302779	Up regulated
A_24_P34611	SIX3	Coding Gene	5.23854	0.724432	3.69258	0.115034	0.00663989	Down regulated
A_33_P3216008	SKA3	Coding Gene	4.9494	0.852035	5.96971	0.504514	0.0387983	Up regulated
A_33_P3303857	SLAMF6	Coding Gene	3.46616	1.40721	5.11304	0.613421	0.03718	Up regulated
A_24_P45451	SLAMF6	Coding Gene	2.64266	0.856835	4.36306	0.354828	0.00942125	Up regulated
A_24_P353638	SLAMF7	Coding Gene	10.651	0.586686	11.6521	0.491916	0.0211021	Up regulated
A_23_P158725	SLC16A3	Coding Gene	13.0456	0.431272	11.8568	0.256896	0.00393114	Down regulated
A_23_P33168	SLC18A1	Coding Gene	3.74635	0.873907	4.78715	0.43661	0.0371789	Up regulated
A_33_P3384108	SLC19A1	Coding Gene	10.9305	0.614276	9.27711	1.00352	0.0152005	Down regulated
A_33_P3265549	SLC19A1	Coding Gene	7.91654	0.552931	6.23595	0.950168	0.0118531	Down regulated
A_23_P156180	SLC22A4	Coding Gene	8.33233	0.286657	7.21237	0.422147	0.00383327	Down regulated
A_23_P21990	SLC23A1	Coding Gene	9.43935	0.750874	8.35558	1.03024	0.0493695	Down regulated
A_23_P123228	SLC26A3	Coding Gene	14.5769	0.851444	13.1255	1.28345	0.0390299	Down regulated
A_23_P201248	SLC26A9	Coding Gene	1.90462	0.741384	3.11996	0.963883	0.0357716	Up regulated
A_23_P14667	SLC28A1	Coding Gene	8.53659	0.669506	7.37952	0.837132	0.0301095	Down regulated
A_24_P156748	SLC30A2	Coding Gene	6.2792	0.84365	5.08309	0.691657	0.0319295	Down regulated
A_23_P390032	SLC35G1	Coding Gene	9.39862	1.1049	8.00704	0.972874	0.04311	Down regulated
A_24_P142503	SLC47A1	Coding Gene	3.41199	1.19377	5.10313	0.553999	0.0245158	Up regulated
A_33_P3210418	SLC5A10	Coding Gene	3.04289	1.07418	1.87559	0.509515	0.0438055	Down regulated
A_23_P323943	SLC5A12	Coding Gene	6.86931	1.18562	4.63282	1.43177	0.0237555	Down regulated
A_24_P242581	SLC5A9	Coding Gene	8.64627	0.893704	7.61654	0.154099	0.0343574	Down regulated
A_21_P0000624	SLC6A13	Coding Gene	2.83761	0.948666	3.90683	0.507482	0.0423474	Up regulated
A_23_P64980	SLC6A13	Coding Gene	7.65209	0.865829	6.27719	0.543427	0.0208742	Down regulated
A_33_P3259022	SLC6A2	Coding Gene	4.54925	0.818416	5.58438	0.746831	0.0437473	Up regulated
A_24_P20369	SLC6A20	Coding Gene	5.9542	0.903009	4.88127	0.725073	0.0460035	Down regulated
A_33_P3402615	SLC6A9	Coding Gene	6.73457	0.98753	8.02316	0.370996	0.0281072	Up regulated
A_33_P3254380	SLC9A7	Coding Gene	5.48377	0.908547	6.83007	0.37362	0.0212303	Up regulated
A_23_P11032	SLC9A7	Coding Gene	6.11171	0.569258	7.30961	0.471599	0.012219	Up regulated
A_22_P00014914	SLCO5A1	Coding Gene	2.63383	1.13608	3.80145	0.244654	0.0439196	Up regulated
A_22_P00020493	SMAD2	Coding Gene	2.13415	0.836531	3.27087	0.458687	0.0286137	Up regulated
A_33_P3378334	SMC2	Coding Gene	5.41501	0.848863	6.6019	0.576424	0.0294423	Up regulated
A_33_P3221034	SMIM17	Coding Gene	3.30482	0.642212	2.18764	0.355136	0.0158577	Down regulated
A_33_P3351416	SMOC2	Coding Gene	4.47733	1.78711	6.38172	1.05488	0.0494388	Up regulated
A_23_P70307	SMOC2	Coding Gene	9.66481	1.31087	11.2736	0.963543	0.0406165	Up regulated
A_23_P41365	SMR3A	Coding Gene	6.17855	1.37841	8.67696	0.915322	0.0156908	Up regulated
A_33_P3590673	SNHG18	lnc	10.522	0.429456	9.5037	0.352332	0.00852068	Down regulated
A_32_P187704	SNTG1	Coding Gene	3.32707	0.494406	1.61674	1.03358	0.0121259	Down regulated
A_33_P3289536	SNX10	Coding Gene	3.20698	0.815813	4.39242	0.483324	0.0252085	Up regulated
A_23_P25615	SOHLH2	Coding Gene	1.3417	0.302357	3.12423	1.2209	0.0128984	Up regulated
A_23_P164011	SOX15	Coding Gene	1.78739	1.06135	3.24357	0.570408	0.027688	Up regulated
A_33_P3268555	SP140	Coding Gene	5.51882	1.13084	7.00445	0.907424	0.0373139	Up regulated
A_33_P3394105	SPATA2L	Coding Gene	4.50336	0.240848	3.4697	1.10328	0.0366803	Down regulated
A_23_P51085	SPC25	Coding Gene	6.66414	1.09244	7.80644	0.532939	0.0481559	Up regulated
A_33_P3314659	SPEF2	Coding Gene	3.00886	0.830975	4.09759	0.434308	0.0303409	Up regulated
A_23_P129085	SPESP1	Coding Gene	1.6193	0.559647	2.98824	1.07346	0.0248891	Up regulated
A_24_P354689	SPOCK1	Coding Gene	1.58793	0.712849	2.78213	1.16479	0.0447425	Up regulated
A_33_P3401981	SPRED3	Coding Gene	4.00743	0.794195	2.12962	0.906078	0.0125544	Down regulated
A_33_P3274811	SPRR2F	Coding Gene	7.6543	1.125	6.23481	0.594211	0.0331134	Down regulated
A_23_P258381	SPSB4	Coding Gene	9.30798	0.48042	10.3989	0.161778	0.00600373	Up regulated
A_33_P3396635	SSX3	Coding Gene	5.0487	0.653157	6.10636	0.514233	0.0230784	Up regulated
A_24_P181055	ST3GAL4	Coding Gene	4.58206	0.757098	2.97065	1.0918	0.022474	Down regulated
A_33_P3275055	ST6GALNAC3	Coding Gene	4.07227	0.779444	2.65498	0.799377	0.0218809	Down regulated
A_33_P3254751	ST6GALNAC6	Coding Gene	4.35083	0.632831	5.91333	0.945952	0.0163132	Up regulated
A_24_P274270	STAT1	Coding Gene	9.23047	0.471187	10.8032	0.862154	0.0101246	Up regulated
A_23_P108514	STK16	Coding Gene	9.60117	0.332864	8.50488	0.227378	0.00214649	Down regulated
A_23_P163238	STRC	Coding Gene	5.84071	0.770022	4.55776	1.20937	0.0429999	Down regulated
A_32_P194115	SUN2	Coding Gene	6.00039	0.842888	4.71734	0.39725	0.0205465	Down regulated
A_33_P3327663	SUSD4	Coding Gene	7.88552	0.365233	9.70813	0.251536	0.000347065	Up regulated
A_24_P238131	SUSD5	Coding Gene	1.28979	0.505745	2.43083	1.28398	0.0473633	Up regulated
A_33_P3335920	SYNE1	Coding Gene	7.46638	0.358517	8.6471	0.251532	0.00214649	Up regulated
A_23_P164927	SYNGR4	Coding Gene	6.92101	0.539858	8.58134	0.193966	0.00204865	Up regulated
A_23_P80718	SYNPR	Coding Gene	1.29639	0.269887	2.60612	1.47883	0.0401536	Up regulated
A_24_P248240	SYT11	Coding Gene	4.37568	1.25393	5.60192	0.278843	0.0492184	Up regulated
A_23_P36187	SYT8	Coding Gene	5.27708	0.670681	3.96122	1.16892	0.0354745	Down regulated
A_24_P405054	SZRD1	Coding Gene	8.86146	0.303745	7.83146	0.228565	0.00213556	Down regulated
A_23_P159305	TAF15	Coding Gene	11.0328	0.229361	9.5672	0.325711	0.000347065	Down regulated
A_23_P35309	TAF5L	Coding Gene	6.71162	0.373422	4.91605	0.303478	0.000347065	Down regulated
A_23_P339588	TAGAP	Coding Gene	2.86889	0.858323	3.93193	0.441065	0.0342902	Up regulated
A_24_P354724	TAGAP	Coding Gene	5.62331	0.491561	6.76869	0.457965	0.0101246	Up regulated
A_33_P3319760	TAGLN2	Coding Gene	10.9146	0.441557	9.4947	0.458064	0.00401052	Down regulated
A_23_P308673	TAOK2	Coding Gene	5.78083	0.356235	3.09647	0.357724	5.46e-05	Down regulated
A_23_P59005	TAP1	Coding Gene	12.5854	0.24323	13.8752	0.647595	0.00576082	Up regulated
A_23_P368067	TAP2	Coding Gene	2.55043	0.869506	3.70713	0.471918	0.0298096	Up regulated
A_33_P3378659	CD3G	Coding Gene	8.40126	0.848819	9.51325	0.54487	0.0330572	Up regulated
A_23_P58983	TBC1D22B	Coding Gene	7.87331	0.350086	6.78781	0.328778	0.00401052	Down regulated
A_32_P214925	TCAF2	Coding Gene	3.59807	1.13195	4.8891	0.57541	0.0405466	Up regulated
A_23_P94795	TEAD4	Coding Gene	6.81049	0.877944	5.58244	0.32951	0.0240005	Down regulated
A_24_P151582	TEF	Coding Gene	7.42667	0.639343	5.56559	0.565754	0.00470955	Down regulated
A_33_P3222977	TEKT5	Coding Gene	2.56968	0.869096	3.63896	0.496873	0.0361402	Up regulated
A_33_P3331335	TET3	Coding Gene	2.61613	1.18043	1.20757	0.0417747	0.0312192	Down regulated
A_23_P74723	TEX35	Coding Gene	4.44435	0.762995	3.0472	1.40281	0.0437338	Down regulated
A_24_P156635	TEX35	Coding Gene	3.2928	0.72221	2.12222	0.516787	0.0215475	Down regulated
A_23_P202773	TEX40	Coding Gene	5.95415	0.596425	7.62469	0.611095	0.00631447	Up regulated
A_23_P322116	TFAP2E	Coding Gene	3.51819	0.309319	2.20809	0.96859	0.0170587	Down regulated
A_33_P3212615	TFPI	Coding Gene	9.55912	0.84543	8.52885	0.704608	0.0444152	Down regulated
A_23_P330070	TFPI	Coding Gene	8.46036	0.892631	7.22589	0.692786	0.0325254	Down regulated
A_33_P3258274	TFPI	Coding Gene	10.0565	0.494269	8.90723	0.486544	0.0109416	Down regulated
A_23_P393620	TFPI2	Coding Gene	4.73665	0.665447	6.31302	1.00028	0.0184599	Up regulated
A_24_P402438	TGFB2	Coding Gene	1.7055	0.676394	3.23268	0.435911	0.00800928	Up regulated
A_24_P923251	TGM2	Coding Gene	4.94125	0.795608	6.35672	1.30156	0.0396307	Up regulated
A_32_P86763	TGM2	Coding Gene	5.06147	0.940072	6.86827	1.42424	0.030196	Up regulated
A_23_P57118	TGM3	Coding Gene	3.0367	0.842279	1.9047	0.648453	0.0345355	Down regulated
A_33_P3249259	TGM6	Coding Gene	4.09497	0.609008	5.30319	0.627968	0.0177286	Up regulated
A_33_P3240693	THSD4	Coding Gene	6.74329	1.17093	5.34038	0.929287	0.044674	Down regulated
A_33_P3380383	TIFAB	Coding Gene	5.81133	1.00274	7.09937	1.03879	0.0473134	Up regulated
A_33_P3235213	TIGIT	Coding Gene	5.25254	0.75395	6.68128	0.729032	0.0185889	Up regulated
A_33_P3342056	TIGIT	Coding Gene	5.17944	0.605397	6.62787	0.771893	0.014009	Up regulated
A_23_P107421	TK1	Coding Gene	11.7205	0.918648	13.0725	0.321279	0.0207422	Up regulated
A_33_P3217719	TLE1	Coding Gene	4.58019	0.569839	5.94238	1.3109	0.0357716	Up regulated
A_33_P3380807	TLR9	Coding Gene	3.23234	0.658741	4.60804	0.671493	0.0153173	Up regulated
A_23_P79331	TMBIM1	Coding Gene	10.9883	0.731993	9.77675	0.692437	0.0252085	Down regulated
A_23_P70127	TMED9	Coding Gene	8.80501	0.656242	7.18948	0.509159	0.00697567	Down regulated
A_33_P3373975	TMEM106B	Coding Gene	2.038	1.03461	1.01336	0.019562	0.0463577	Down regulated
A_23_P24716	TMEM132A	Coding Gene	7.30314	0.949661	8.40322	0.552087	0.0410676	Up regulated
A_23_P361584	TMEM154	Coding Gene	4.00124	1.15077	5.2043	0.329718	0.0435227	Up regulated
A_24_P822704	TMEM198	Coding Gene	8.49212	0.403606	6.34321	0.958574	0.00402069	Down regulated
A_33_P3373384	TMEM231	Coding Gene	4.00174	0.957083	2.44923	0.771023	0.0234197	Down regulated
A_33_P3362153	TMEM238	Coding Gene	14.4636	0.700268	15.8121	0.408925	0.0123456	Up regulated
A_24_P133017	TMEM25	Coding Gene	7.85686	0.144388	6.66344	0.375153	0.000703434	Down regulated
A_33_P3274319	TMEM52	Coding Gene	7.11705	0.591566	5.77731	0.706847	0.0150091	Down regulated
A_23_P211493	TMPRSS6	Coding Gene	7.86857	0.558113	6.56718	0.541798	0.0106476	Down regulated
A_33_P3361891	TMPRSS7	Coding Gene	5.80662	0.51904	4.58749	0.900481	0.0234197	Down regulated
A_23_P49338	TNFRSF12A	Coding Gene	11.6666	0.67564	10.5173	0.367997	0.0166723	Down regulated
A_23_P91764	TNFRSF13C	Coding Gene	5.27843	0.580709	6.80804	1.3513	0.0292292	Up regulated
A_23_P51936	TNFRSF9	Coding Gene	2.98512	0.382612	5.29618	1.26243	0.0067782	Up regulated
A_23_P386478	TNIP3	Coding Gene	3.08073	0.918407	4.53507	0.876967	0.0280218	Up regulated
A_33_P3321507	TNRC18	Coding Gene	15.0619	0.964727	16.6582	0.481782	0.0173958	Up regulated
A_23_P207850	TNS4	Coding Gene	5.54514	1.16083	6.99355	0.17717	0.0287102	Up regulated
A_23_P118834	TOP2A	Coding Gene	5.38518	1.15557	6.70382	0.895169	0.0489479	Up regulated
A_23_P154566	TOX2	Coding Gene	7.61093	0.739078	8.67837	0.858783	0.0409654	Up regulated
A_33_P3418838	TPD52	Coding Gene	3.48863	0.508282	2.42898	0.981743	0.0360043	Down regulated
A_23_P68610	TPX2	Coding Gene	7.33378	0.928735	8.51857	0.631773	0.0361154	Up regulated
A_23_P15654	TRAF4	Coding Gene	9.16931	0.372571	7.5942	0.145617	0.000347065	Down regulated
A_33_P3390793	TRIM36	Coding Gene	7.98212	0.906759	6.45467	0.967299	0.0269058	Down regulated
A_33_P3315423	TRIM62	Coding Gene	3.88217	0.624374	2.85894	1.05828	0.0494388	Down regulated
A_24_P4054	TRIP6	Coding Gene	8.27197	1.02022	9.41284	0.404422	0.0397182	Up regulated
A_33_P3225567	TRMT2B	Coding Gene	7.12444	0.475796	8.78242	0.410978	0.00214649	Up regulated
A_23_P114061	TRPM3	Coding Gene	4.3376	1.12006	3.18245	0.33715	0.0450082	Down regulated
A_23_P216712	TRPM6	Coding Gene	10.1258	0.788293	8.69847	0.922275	0.0252085	Down regulated
A_23_P49862	TRPV3	Coding Gene	3.3445	0.764805	1.87763	0.916934	0.0228784	Down regulated
A_23_P145984	TSPAN12	Coding Gene	8.49328	0.414888	7.45089	0.632725	0.0160086	Down regulated
A_24_P13083	TSPAN18	Coding Gene	5.56644	0.859962	6.73491	0.633286	0.0327967	Up regulated
A_33_P3310744	TTC34	Coding Gene	3.78968	0.603968	2.58084	1.00096	0.0312255	Down regulated
A_33_P3259615	TTC36	Coding Gene	7.09199	0.455714	5.96384	0.476014	0.0095984	Down regulated
A_21_P0008509	TTC6	Coding Gene	5.05556	0.874844	3.54735	0.705668	0.0200788	Down regulated
A_23_P259586	TTK	Coding Gene	5.10351	1.25712	6.61183	0.778215	0.0391862	Up regulated
A_23_P77493	TUBB3	Coding Gene	4.85645	1.63932	6.51925	0.467968	0.0465388	Up regulated
A_33_P3371333	TUBB8	Coding Gene	2.86325	0.865532	1.38453	0.585249	0.0184599	Down regulated
A_33_P3409518	TUBBP5	Pseudo	7.54677	0.766743	6.05137	1.537	0.0435905	Down regulated
A_33_P3323718	UACA	Coding Gene	6.91794	0.311207	5.83135	0.501936	0.00665767	Down regulated
A_23_P81898	UBD	Coding Gene	8.85413	1.19107	11.8894	2.25358	0.0222316	Up regulated
A_24_P297539	UBE2C	Coding Gene	8.99479	1.11729	10.4093	0.485752	0.0312115	Up regulated
A_23_P141847	UBE2M	Coding Gene	8.27241	0.484899	7.08983	0.519209	0.0104602	Down regulated
A_33_P3241369	UCN3	Coding Gene	4.76116	0.975251	3.73187	0.43485	0.0462306	Down regulated
A_23_P7342	UGT2B10	Coding Gene	14.5781	0.81948	13.3026	0.959838	0.0357143	Down regulated
A_23_P212968	UGT2B11	Coding Gene	11.5825	0.824026	10.4636	0.871165	0.042823	Down regulated
A_23_P58407	UGT2B15	Coding Gene	14.1246	0.949719	10.6728	3.85751	0.0408155	Down regulated
A_23_P136671	UGT2B7	Coding Gene	12.7723	0.702348	11.2416	1.21907	0.027688	Down regulated
A_23_P208880	UHRF1	Coding Gene	6.396	0.760514	7.66376	0.2362	0.0151849	Up regulated
A_24_P932594	ULK2	Coding Gene	2.80557	1.0731	1.4094	0.266559	0.0265605	Down regulated
A_33_P3374299	UNC5CL	Coding Gene	4.026	1.02655	2.62716	0.956379	0.0383156	Down regulated
A_23_P214408	UNC93A	Coding Gene	8.22321	0.870581	6.54192	1.19924	0.0260621	Down regulated
A_33_P3411388	UNCX	Coding Gene	13.5308	0.513085	11.3764	0.315362	0.000496175	Down regulated
A_23_P120822	UPB1	Coding Gene	7.71729	0.871435	4.22394	2.04654	0.0101246	Down regulated
A_33_P3308468	UPB1	Coding Gene	5.23453	0.836598	2.1295	1.24809	0.00474091	Down regulated
A_24_P348594	UPK3A	Coding Gene	3.40226	1.01928	2.13638	0.814045	0.0417741	Down regulated
A_21_P0013246	UPK3B	Coding Gene	2.78672	0.611155	1.78192	0.595946	0.0259102	Down regulated
A_24_P366859	USHBP1	Coding Gene	1.74117	0.531025	2.84732	0.130329	0.00734627	Up regulated
A_23_P331770	USP49	Coding Gene	2.95392	0.473039	1.65924	0.736334	0.0130443	Down regulated
A_33_P3234849	UTRN	Coding Gene	3.50125	0.690154	4.55826	0.0833671	0.0175262	Up regulated
A_24_P45620	UTS2	Coding Gene	1.43864	0.380286	3.1665	1.96466	0.0409654	Up regulated
A_22_P00002410	VASH1	Coding Gene	10.7565	0.689438	12.0048	0.63248	0.0197933	Up regulated
A_33_P3399571	VNN1	Coding Gene	13.4986	0.651077	12.4496	0.766359	0.0329673	Down regulated
A_33_P3395848	VSIG10L	Coding Gene	4.09209	0.585208	2.91706	0.576973	0.016332	Down regulated
A_23_P65651	WARS	Coding Gene	8.83181	0.60114	9.98947	0.604636	0.0185889	Up regulated
A_23_P111517	WBSCR17	Coding Gene	3.6028	0.645984	2.37714	0.808745	0.0243823	Down regulated
A_32_P30905	WDFY4	Coding Gene	8.84027	0.675768	10.1005	1.0474	0.0332337	Up regulated
A_33_P3209651	WDFY4	Coding Gene	5.26023	1.15132	6.88639	0.83736	0.0298096	Up regulated
A_23_P25873	WDHD1	Coding Gene	5.64557	0.817936	6.94753	0.300897	0.0175262	Up regulated
A_33_P3349927	WDR60	Coding Gene	3.76317	0.600468	2.51896	0.62103	0.0158577	Down regulated
A_33_P3254606	WDR62	Coding Gene	7.44268	0.841047	8.77365	0.649284	0.0239746	Up regulated
A_23_P422732	WDR63	Coding Gene	2.1098	0.401202	3.15339	0.906263	0.0286137	Up regulated
A_33_P3265394	WDR74	Coding Gene	2.95916	0.85315	1.52393	0.469356	0.0173958	Down regulated
A_33_P3229702	WFIKKN1	Coding Gene	4.89121	0.87418	3.68256	0.887445	0.0397182	Down regulated
A_23_P330616	WIPF1	Coding Gene	6.82675	0.650331	7.978	0.715501	0.0248891	Up regulated
A_33_P3605352	WWTR1	Coding Gene	2.43279	0.833374	1.1154	0.108495	0.0160558	Down regulated
A_24_P557479	XAF1	Coding Gene	8.15138	0.6612	9.17584	0.550287	0.0261997	Up regulated
A_22_P00005046	XKR5	Coding Gene	2.96762	0.987499	4.17635	0.498736	0.0350642	Up regulated
A_32_P416161	XKRX	Coding Gene	5.58301	0.496021	3.13156	1.22793	0.00600373	Down regulated
A_33_P3363515	XRCC3	Coding Gene	14.8993	0.953077	16.0287	0.801548	0.0476159	Up regulated
A_33_P3301524	XRCC3	Coding Gene	6.99793	0.600571	8.26161	0.399962	0.0101614	Up regulated
A_33_P3405995	YBEY	Coding Gene	6.62561	0.493186	5.34874	0.802912	0.016606	Down regulated
A_32_P18547	YBEY	Coding Gene	8.94669	0.464005	7.46675	0.801359	0.0102544	Down regulated
A_23_P131024	ZBTB32	Coding Gene	3.8499	1.26854	5.66092	1.44478	0.0411951	Up regulated
A_33_P3214432	ZC3HAV1L	Coding Gene	9.82919	0.493209	11.133	0.300934	0.00470955	Up regulated
A_33_P3235706	ZCCHC11	Coding Gene	2.74335	1.03664	4.33122	1.48596	0.0458238	Up regulated
A_24_P217306	ZIC4	Coding Gene	4.0121	0.780327	5.03633	0.550801	0.0345658	Up regulated
A_33_P3356631	ZKSCAN8	Coding Gene	4.09929	0.899358	5.26981	0.317748	0.027968	Up regulated
A_22_P00000430	ZNF316	Coding Gene	7.44357	0.533402	5.5852	0.663824	0.00401052	Down regulated
A_23_P26314	ZNF319	Coding Gene	2.2293	0.834998	3.44809	0.395852	0.0230808	Up regulated
A_24_P218074	ZNF467	Coding Gene	13.0298	0.308452	14.1599	0.220612	0.00133077	Up regulated
A_33_P3243667	ZNF678	Coding Gene	2.47888	0.847438	3.51186	0.594049	0.040191	Up regulated
A_21_P0011759	ZNF702P	Pseudo	3.5066	1.09112	2.16517	0.611276	0.0360043	Down regulated
A_23_P340149	ZNF711	Coding Gene	2.98757	0.991114	1.78886	0.937154	0.0497112	Down regulated
A_33_P3340309	ZNF768	Coding Gene	10.4941	0.369736	8.50591	0.573366	0.0010453	Down regulated
A_32_P206479	ZNF831	Coding Gene	5.46884	0.418698	6.71176	0.688651	0.0117529	Up regulated
A_32_P761797	LINC00116	LINC	4.19447	0.967803	2.46258	1.10961	0.0252648	Down regulated
A_32_P324933	LINC00282	LINC	3.0671	0.954111	1.92526	0.623393	0.0403586	Down regulated
A_22_P00005103	LINC00282	LINC	6.23044	0.833544	5.16629	0.662681	0.0391862	Down regulated
A_22_P00002434	LINC00341	LINC	2.58059	0.800958	1.53994	0.0593451	0.0255361	Down regulated
A_22_P00008444	LINC00426	LINC	2.8062	0.792579	3.87485	0.682602	0.0371789	Up regulated
A_33_P3333960	LINC00426	LINC	6.47249	0.646986	7.70128	0.900275	0.027719	Up regulated
A_21_P0008024	LINC00442	LINC	3.07347	0.911568	2.00844	0.608973	0.0429455	Down regulated
A_22_P00004912	LINC00443	LINC	3	0.647734	1.72906	0.905473	0.0256285	Down regulated
A_32_P127350	LINC00461	LINC	1.97154	0.857173	3.15004	0.749255	0.0360043	Up regulated
A_33_P6806144	LINC00476	LINC	4.63245	1.07867	7.4486	0.771089	0.0053287	Up regulated
A_33_P3239467	LINC00479	LINC	3.8062	0.908405	2.4488	1.27084	0.0469266	Down regulated
A_22_P00004006	LINC00506	LINC	1.4584	0.570007	2.87023	1.43771	0.0385002	Up regulated
A_22_P00008961	LINC00520	LINC	2.27057	0.850749	3.4893	1.0319	0.0435227	Up regulated
A_24_P120734	LINC00525	LINC	1.63018	0.940928	3.50988	0.795777	0.0144022	Up regulated
A_21_P0007476	LINC00592	LINC	3.13038	0.709247	1.98979	0.941036	0.0379805	Down regulated
A_19_P00321284	LINC00630	LINC	3.93622	1.00112	2.59386	0.321376	0.0255361	Down regulated
A_21_P0011267	LINC00639	LINC	4.18987	0.994364	6.14273	0.493274	0.0107779	Up regulated
A_33_P3565133	LINC00642	LINC	2.14289	0.842228	1.06885	0.269108	0.028983	Down regulated
A_33_P3251640	LINC00663	LINC	2.5253	0.691628	3.8892	0.637228	0.0159339	Up regulated
A_19_P00319646	LINC00673	LINC	9.04176	0.744536	7.95684	0.546713	0.0279968	Down regulated
A_22_P00014796	LINC00673	LINC	7.22783	0.822361	6.00889	0.564783	0.0256285	Down regulated
A_33_P6807856	LINC00689	LINC	2.47826	0.738148	3.47904	0.619902	0.0360043	Up regulated
A_33_P3339070	LINC00704	LINC	5.22074	0.563153	3.2523	1.58645	0.0218925	Down regulated
A_22_P00000938	LINC00704	LINC	8.00812	0.715714	5.57457	1.7464	0.0175262	Down regulated
A_21_P0010723	LINC00869	LINC	3.81779	0.750142	2.73085	0.459211	0.0255476	Down regulated
A_33_P3274754	LINC00893	LINC	3.65713	0.853984	1.86031	0.492029	0.00942125	Down regulated
A_22_P00002170	LINC00958	LINC	3.48368	0.76957	1.85489	1.03433	0.0204378	Down regulated
A_21_P0004219	LINC01018	LINC	2.67089	1.16833	1.33546	0.441072	0.0378906	Down regulated
A_21_P0004484	LINC01018	LINC	7.63895	0.626569	9.2745	0.643028	0.00799036	Up regulated
A_21_P0004355	LINC01019	LINC	3.05756	0.69451	2.0478	0.62839	0.0324456	Down regulated
A_22_P00010963	LINC01024	LINC	3.08149	0.894923	1.92613	0.783749	0.0408049	Down regulated
A_21_P0012596	LINC01088	LINC	5.69044	0.370703	4.60254	0.412442	0.00612457	Down regulated
A_19_P00800638	LINC01088	LINC	9.65335	0.573818	11.1435	0.156518	0.0036612	Up regulated
A_22_P00015375	LINC01121	LINC	5.47075	0.630289	6.98568	0.269615	0.00521529	Up regulated
A_19_P00321009	LINC01133	LINC	11.432	0.307933	10.3409	0.417457	0.00465918	Down regulated
A_21_P0010690	LINC01134	LINC	3.65038	0.940785	2.47076	0.934263	0.0478876	Down regulated
A_22_P00003999	LINC01136	LINC	4.0934	0.996902	5.21696	0.51225	0.0418313	Up regulated
A_22_P00007316	LINC01146	LINC	2.93747	0.594673	3.96207	0.501989	0.0205808	Up regulated
A_22_P00007250	LINC01257	LINC	2.26048	1.13473	3.45348	0.334919	0.0431283	Up regulated
A_22_P00003850	LINC01272	LINC	3.78076	0.854035	6.04887	0.684064	0.00571077	Up regulated
A_22_P00009666	LINC01399	LINC	3.77691	0.950616	2.03964	0.858606	0.0191627	Down regulated
A_22_P00004574	LINC01422	LINC	3.3256	0.778199	2.28285	0.760969	0.0410161	Down regulated
A_22_P00012622	LINC01476	LINC	2.1767	0.989005	1.15632	0.020695	0.0424485	Down regulated
A_33_P3420247	LINC01501	LINC	2.77397	0.779311	4.08318	0.552852	0.0196743	Up regulated
A_22_P00012438	LINC01529	LINC	3.09281	0.34172	1.7888	1.12221	0.0240875	Down regulated
A_19_P00802433	LINC01564	LINC	6.42997	1.45412	4.81975	0.790192	0.0439196	Down regulated
A_21_P0008772	LINC01584	LINC	1.19006	0.251782	2.3154	0.819944	0.0160086	Up regulated
A_22_P00005076	LINC01586	LINC	2.23306	0.828344	1.22474	0.189996	0.0309351	Down regulated
A_22_P00012489	LINCR-0001	LINC	5.11632	0.917955	3.70774	1.26066	0.0431849	Down regulated
A_22_P00025913	lnc-AC002472.13.1-1	lnc	2.73144	0.731304	1.71023	0.682458	0.0364172	Down regulated
A_21_P0002619	lnc-AC007405.7.1-2	lnc	10.0561	0.597585	11.6907	0.638087	0.00721163	Up regulated
A_22_P00024553	lnc-AC008073.6.1-1	lnc	3.25748	1.1471	1.33469	0.263719	0.0143302	Down regulated
A_21_P0002177	lnc-AC008271.1.1-1	lnc	3.16038	0.333809	2.10249	1.06164	0.0344739	Down regulated
A_21_P0005595	lnc-AC091801.1.1-5	lnc	1.50018	0.276064	3.67268	1.17643	0.00612457	Up regulated
A_21_P0012607	lnc-AC110373.1-6	lnc	2.26642	1.03141	3.36887	0.15315	0.0399014	Up regulated
A_22_P00000581	lnc-AC145676.2.1-1	lnc	2.80457	0.586189	1.06183	0.0242998	0.00201892	Down regulated
A_21_P0009250	lnc-ADAM11-1	lnc	2.99325	0.620351	4.27114	0.605518	0.0152181	Up regulated
A_22_P00000693	lnc-ADAM21-2	lnc	3.87683	0.888289	5.45531	0.1522	0.0119718	Up regulated
A_22_P00000869	lnc-AGRP-2	lnc	2.79116	0.829088	1.51627	0.391329	0.0200788	Down regulated
A_21_P0006957	lnc-AKR1C2-3	lnc	1.11608	0.0370853	2.68382	1.5115	0.0269312	Up regulated
A_21_P0006309	lnc-AL162389.1-1	lnc	4.85942	0.622665	3.12018	0.41476	0.00401052	Down regulated
A_22_P00001060	lnc-ALB-1	lnc	4.35622	0.967727	2.89691	0.997815	0.0334152	Down regulated
A_21_P0008575	lnc-ALDH1A3-1	lnc	3.93249	0.688841	2.48738	1.21195	0.0307903	Down regulated
A_33_P3224206	lnc-ALX3-1	lnc	3.13685	0.637153	1.55368	0.57988	0.00807938	Down regulated
A_21_P0006149	lnc-ANKRD20A1-2	lnc	5.83013	1.02856	4.75875	0.437099	0.0469349	Down regulated
A_21_P0006352	lnc-ANXA1-2	lnc	2.33198	1.01094	1.01401	0.0390948	0.0254333	Down regulated
A_22_P00001334	lnc-ANXA9-1	lnc	4.33104	0.836999	3.25765	0.534918	0.0345767	Down regulated
A_33_P3774867	lnc-AP002478.1-1	lnc	2.41694	0.780661	4.21767	0.708996	0.0101246	Up regulated
A_22_P00001383	lnc-AP3M1-1	lnc	1.82478	0.522847	3.43869	1.44138	0.0278073	Up regulated
A_22_P00001392	lnc-AP4E1-1	lnc	5.07669	0.864354	3.62962	0.71992	0.0222316	Down regulated
A_22_P00025256	lnc-APAF1-1	lnc	2.69629	1.15783	1.49052	0.24054	0.0428801	Down regulated
A_22_P00018930	lnc-APOBEC4-1	lnc	2.21855	0.88338	1.14675	0.0141411	0.0298398	Down regulated
A_21_P0005439	lnc-ARHGEF5-1	lnc	3.93675	0.710558	2.92805	0.843447	0.0433802	Down regulated
A_21_P0006658	lnc-ARL5B-1	lnc	3.09772	0.760637	1.69366	0.285058	0.0118531	Down regulated
A_21_P0005402	lnc-ASB4-3	lnc	2.51435	0.635966	1.36609	0.565912	0.0194525	Down regulated
A_21_P0006477	lnc-ASMT-1	lnc	5.08693	0.889284	6.34532	1.12122	0.0467336	Up regulated
A_22_P00023833	lnc-ASXL1-2	lnc	1.57662	0.512946	2.92222	1.21323	0.0302779	Up regulated
A_21_P0001737	lnc-ATP1A1OS-3	lnc	7.49551	0.732383	6.3897	0.541795	0.0256285	Down regulated
A_21_P0006294	lnc-AUH-2	lnc	4.30986	1.15662	2.82884	1.086	0.0435931	Down regulated
A_22_P00001903	lnc-B4GALT7-1	lnc	3.99875	0.900235	2.77977	0.741641	0.0357716	Down regulated
A_22_P00001941	lnc-BARHL2-3	lnc	1.2638	0.107383	2.57619	1.23249	0.0255361	Up regulated
A_21_P0002443	lnc-BCL11A-5	lnc	2.02893	0.99627	3.60698	1.00192	0.0294411	Up regulated
A_22_P00002047	lnc-BID-1	lnc	4.43208	1.04716	2.78419	1.11282	0.0313077	Down regulated
A_21_P0007412	lnc-BLID-1	lnc	3.45168	0.721135	2.22365	0.761048	0.0257445	Down regulated
A_21_P0006903	lnc-BTRC-2	lnc	6.84328	0.681839	7.90491	0.512815	0.0243823	Up regulated
A_21_P0006876	lnc-C10orf107-1	lnc	2.52969	0.808457	1.50266	0.757871	0.0442532	Down regulated
A_22_P00019422	lnc-C10orf31-1	lnc	3.12224	0.905533	4.16111	0.211969	0.0355594	Up regulated
A_22_P00024733	lnc-C10orf90-3	lnc	2.39348	0.846271	1.36068	0.236629	0.0312255	Down regulated
A_22_P00002314	lnc-C11orf39-3	lnc	2.39761	1.00928	1.07912	0.0710741	0.0253896	Down regulated
A_22_P00002383	lnc-C13orf15-1	lnc	5.79023	1.10617	7.07324	0.618343	0.0403955	Up regulated
A_21_P0008402	lnc-C14orf79-2	lnc	6.98161	1.12509	8.60623	0.505177	0.0234197	Up regulated
A_22_P00002481	lnc-C15orf57-2	lnc	6.57648	1.03665	8.44812	0.614416	0.0149027	Up regulated
A_33_P3287661	lnc-C16orf42-2	lnc	10.4147	0.47476	11.6893	0.230277	0.00383327	Up regulated
A_21_P0008904	lnc-C16orf72-4	lnc	3.78704	0.909964	1.56673	0.845511	0.00901686	Down regulated
A_21_P0008905	lnc-C16orf72-5	lnc	3.69384	1.30089	1.4849	0.560185	0.0154181	Down regulated
A_22_P00002544	lnc-C17orf63-2	lnc	2.44608	1.05039	3.55501	0.248677	0.0419467	Up regulated
A_22_P00002568	lnc-C17orf89-1	lnc	2.19415	0.712806	3.23279	0.870236	0.0424263	Up regulated
A_21_P0001469	lnc-C1orf195-3	lnc	3.80368	0.693045	2.62727	0.767292	0.0275599	Down regulated
A_21_P0001481	lnc-C1orf201-3	lnc	5.05732	0.445166	6.11916	0.324614	0.00731202	Up regulated
A_22_P00002686	lnc-C1orf86-1	lnc	3.10778	0.421442	2.02818	1.05184	0.0354378	Down regulated
A_22_P00002804	lnc-C2orf42-3	lnc	4.72584	0.448354	5.72831	0.239965	0.00731202	Up regulated
A_21_P0002461	lnc-C2orf81-1	lnc	3.88127	1.94051	6.12567	0.29174	0.0338886	Up regulated
A_22_P00002931	lnc-C5orf35-1	lnc	2.31151	0.611421	1.21388	0.0389152	0.0113975	Down regulated
A_21_P0006359	lnc-C9orf102-3	lnc	2.43854	1.22498	1.13327	0.0213723	0.0396307	Down regulated
A_21_P0005841	lnc-CA8-2	lnc	3.16672	0.730967	4.34656	0.459753	0.0200788	Up regulated
A_22_P00003276	lnc-CALML5-1	lnc	5.26119	0.714264	6.46659	0.540639	0.0200788	Up regulated
A_22_P00003286	lnc-CAMK1G-1	lnc	4.81387	0.909627	3.73877	0.284136	0.0340633	Down regulated
A_22_P00024200	lnc-CASP9-3	lnc	1.27864	0.464193	4.52559	0.381391	5.46e-05	Up regulated
A_21_P0003144	lnc-CBLB-5	lnc	1.31097	0.276127	2.8796	1.09818	0.0135129	Up regulated
A_21_P0007329	lnc-CCDC34-1	lnc	5.75665	0.812901	4.35965	0.644621	0.0200193	Down regulated
A_22_P00003566	lnc-CCT5-1	lnc	4.70219	0.879068	3.55189	0.448835	0.0302278	Down regulated
A_21_P0006553	lnc-CD99L2-2	lnc	3.38942	0.701745	4.58989	0.622155	0.0222316	Up regulated
A_21_P0001666	lnc-CDC42-1	lnc	9.35756	0.715989	10.5882	0.665768	0.0228784	Up regulated
A_21_P0006287	lnc-CDK20-1	lnc	4.32073	0.929769	2.67274	0.617679	0.0165873	Down regulated
A_21_P0006289	lnc-CDK20-5	lnc	2.87297	0.894784	1.66607	0.398887	0.0270564	Down regulated
A_22_P00003788	lnc-CDK5R1-2	lnc	7.28577	0.412331	8.49825	0.21795	0.0027359	Up regulated
A_21_P0006229	lnc-CDK9-1	lnc	1.91137	0.568203	3.12064	0.670709	0.0173958	Up regulated
A_33_P3399733	lnc-CDS1-2	lnc	3.42031	0.520393	2.19509	0.711732	0.0160776	Down regulated
A_22_P00003841	lnc-CEACAM18-1	lnc	2.91407	1.3517	1.44429	0.516657	0.0418577	Down regulated
A_22_P00003934	lnc-CFTR-1	lnc	8.02356	0.707116	6.8002	0.943852	0.0324398	Down regulated
A_21_P0005351	lnc-CHST12-1	lnc	4.34482	0.396532	5.49115	1.21658	0.0391695	Up regulated
A_21_P0005178	lnc-CITED2-4	lnc	3.43702	0.835767	1.87475	0.98116	0.0235415	Down regulated
A_21_P0007522	lnc-CLEC2D-7	lnc	2.54187	0.958445	4.39879	0.652391	0.0130443	Up regulated
A_22_P00022536	lnc-CLIC3-1	lnc	3.29392	0.488589	2.15179	0.832064	0.0228977	Down regulated
A_33_P3519424	lnc-CMPK2-2	lnc	3.6401	0.912957	2.35936	0.85627	0.0362139	Down regulated
A_21_P0002624	lnc-CPO-1	lnc	2.3508	0.626835	3.77421	1.47294	0.0408101	Up regulated
A_21_P0002339	lnc-CPO-1	lnc	2.90892	0.881229	1.70136	0.748448	0.0356402	Down regulated
A_22_P00004521	lnc-CR392000.1-2	lnc	7.92762	0.503433	9.08945	0.294002	0.00696481	Up regulated
A_21_P0008127	lnc-CRYL1-1	lnc	4.3302	0.504066	3.28369	0.346318	0.0109508	Down regulated
A_22_P00004604	lnc-CSMD1-8	lnc	1.92414	0.739627	3.23263	1.00152	0.0314812	Up regulated
A_21_P0009830	lnc-CSRP2BP-1	lnc	8.68612	1.054	10.7519	0.731983	0.0129184	Up regulated
A_21_P0008629	lnc-CTDSPL2-1	lnc	3.97917	1.27043	5.88446	0.739207	0.0234197	Up regulated
A_22_P00004728	lnc-CTIF-1	lnc	5.92839	0.844622	4.7538	0.412907	0.0256848	Down regulated
A_33_P3313864	lnc-CTIF-1	lnc	6.48613	0.623316	5.2364	0.745349	0.0200788	Down regulated
A_22_P00004730	lnc-CTIF-3	lnc	1.73263	0.594155	3.11346	1.32709	0.0360043	Up regulated
A_21_P0007174	lnc-CTR9-3	lnc	4.16659	0.805669	2.83256	0.752202	0.0248891	Down regulated
A_22_P00004765	lnc-CTTNBP2-1	lnc	6.2377	1.33895	4.52823	0.524493	0.0298096	Down regulated
A_22_P00004854	lnc-CYP2J2-1	lnc	2.06715	0.763452	1.03926	0.154731	0.0243823	Down regulated
A_21_P0008747	lnc-DAPK2-1	lnc	2.57961	0.585209	1.44498	0.378963	0.0128431	Down regulated
A_22_P00004916	lnc-DAPP1-1	lnc	1.07878	0.03495	3.03161	1.60643	0.0185889	Up regulated
A_21_P0001160	lnc-DBT-1	lnc	3.43627	0.673946	2.30679	0.831978	0.031913	Down regulated
A_21_P0005007	lnc-DEK-1	lnc	5.13882	0.668999	3.93787	0.602903	0.0199791	Down regulated
A_21_P0006117	lnc-DMRT2-1	lnc	1.61881	0.33565	3.19279	0.348112	0.000677963	Up regulated
A_22_P00005274	lnc-DMXL2-1	lnc	2.60045	0.722651	1.45155	0.984264	0.0397182	Down regulated
A_22_P00020778	lnc-DPH1-1	lnc	5.91249	0.306322	4.31775	0.788894	0.00556485	Down regulated
A_21_P0005157	lnc-DTNBP1-2	lnc	3.47636	0.727948	2.36976	0.870344	0.0381999	Down regulated
A_22_P00005607	lnc-EFR3B-4	lnc	7.76755	1.12941	8.9307	0.525939	0.0491891	Up regulated
A_22_P00005621	lnc-EGR2-1	lnc	3.30881	0.354223	2.07791	0.745639	0.0121259	Down regulated
A_22_P00005639	lnc-EIF2AK3-4	lnc	6.30754	1.52934	8.7857	1.3611	0.0251736	Up regulated
A_21_P0008621	lnc-EIF2AK4-2	lnc	3.08665	1.06372	1.72495	0.789735	0.03773	Down regulated
A_21_P0007822	lnc-EIF2S3L.1-2	lnc	2.24719	1.04078	4.5038	1.32775	0.0183352	Up regulated
A_21_P0001725	lnc-ELOVL1-1	lnc	3.81865	0.365293	1.80976	0.868528	0.00372339	Down regulated
A_21_P0002692	lnc-EPHA4-2	lnc	4.48735	0.470312	5.6625	0.247343	0.00517741	Up regulated
A_22_P00005824	lnc-ERAL1-1	lnc	2.48521	0.899392	1.28073	0.480151	0.0292292	Down regulated
A_21_P0005366	lnc-EVX1-14	lnc	3.04954	0.609099	1.94601	0.768297	0.0273632	Down regulated
A_22_P00005961	lnc-EXTL3-2	lnc	1.33559	0.347696	2.37252	1.08235	0.0379235	Up regulated
A_22_P00005992	lnc-FAAH2-3	lnc	3.72143	1.29227	1.94732	0.528035	0.0254557	Down regulated
A_22_P00006076	lnc-FAM151A-3	lnc	2.75048	0.566767	1.35054	0.601402	0.00990538	Down regulated
A_22_P00006109	lnc-FAM171B-1	lnc	4.11886	0.650092	2.95806	0.960828	0.0344447	Down regulated
A_22_P00021498	lnc-FAM184B-1	lnc	2.50723	0.734769	1.45507	0.669884	0.0338672	Down regulated
A_21_P0009374	lnc-FAM57A-1	lnc	2.29748	0.458073	1.27139	0.597867	0.0173958	Down regulated
A_21_P0008671	lnc-FANCI-3	lnc	4.0949	1.52225	6.38576	0.848438	0.0228784	Up regulated
A_21_P0007828	lnc-FAR2-1	lnc	4.75294	0.906546	3.46379	0.954096	0.0387868	Down regulated
A_21_P0007538	lnc-FAR2-1	lnc	7.24663	0.786143	5.28693	1.28092	0.0184599	Down regulated
A_19_P00801917	lnc-FARS2-2	lnc	6.36551	0.796828	7.5638	0.360866	0.0210358	Up regulated
A_21_P0009638	lnc-FBXO15-5	lnc	1.17177	0.246098	2.23952	1.06795	0.031922	Up regulated
A_21_P0005640	lnc-FBXO25-3	lnc	8.72926	0.669397	10.2759	0.342921	0.00646979	Up regulated
A_22_P00006493	lnc-FGF23-1	lnc	1.29053	0.338736	2.3724	0.264019	0.0027359	Up regulated
A_21_P0009816	lnc-FOXA2-8	lnc	4.09054	1.03223	5.19211	0.619226	0.0496217	Up regulated
A_21_P0009183	lnc-FSCN2-1	lnc	2.37003	1.02246	3.56244	0.846826	0.0487794	Up regulated
A_21_P0006834	lnc-GATA3-2	lnc	2.87668	0.783223	1.85928	0.636074	0.0384219	Down regulated
A_22_P00006994	lnc-GFI1B-1	lnc	2.88148	1.02517	1.27603	0.0273029	0.0163061	Down regulated
A_21_P0014020	lnc-GGT5-1	lnc	3.10211	0.931084	1.46432	0.707531	0.0184599	Down regulated
A_21_P0007308	lnc-GLB1L2-1	lnc	4.35186	1.02307	3.19195	0.682413	0.0457368	Down regulated
A_19_P00322859	lnc-GLB1L2-1	lnc	5.98514	0.909489	4.61946	0.742462	0.0280033	Down regulated
A_21_P0007309	lnc-GLB1L2-3	lnc	7.53432	0.536022	8.88159	0.695694	0.0126661	Up regulated
A_22_P00007081	lnc-GLIPR1L1-1	lnc	2.24301	0.833792	3.54391	0.22776	0.0175262	Up regulated
A_22_P00007110	lnc-GLTP-1	lnc	2.18024	0.807118	3.19478	0.307199	0.0306422	Up regulated
A_22_P00007179	lnc-GNRHR2-1	lnc	2.13275	0.823939	1.09204	0.0196618	0.0273094	Down regulated
A_22_P00007180	lnc-GNS-1	lnc	1.62607	0.515755	2.92424	0.646709	0.011988	Up regulated
A_22_P00007187	lnc-GOLGA8J-3	lnc	11.2713	0.539027	10.0551	1.15565	0.0360043	Down regulated
A_22_P00007350	lnc-GPX1-1	lnc	5.06026	1.12024	3.6904	0.611985	0.0360043	Down regulated
A_22_P00024722	lnc-GRHL2-1	lnc	5.18007	0.553682	6.18402	0.840355	0.0344768	Up regulated
A_22_P00007452	lnc-GTDC1-2	lnc	2.54526	0.932889	1.15379	0.0180229	0.0185635	Down regulated
A_22_P00007594	lnc-HDDC3-1	lnc	8.37847	0.617427	10.1873	0.184956	0.00214649	Up regulated
A_22_P00021997	lnc-IL17B-3	lnc	2.06909	0.64522	3.15488	0.634659	0.0251615	Up regulated
A_19_P00806193	lnc-IL6-3	lnc	2.79742	1.0859	1.5663	0.702838	0.0449741	Down regulated
A_21_P0005217	lnc-IL6-3	lnc	5.37097	0.578786	4.12167	0.446754	0.0106496	Down regulated
A_21_P0002552	lnc-ILKAP-1	lnc	4.26066	0.884463	2.66999	0.836082	0.0204542	Down regulated
A_21_P0002276	lnc-INSIG2-3	lnc	4.88211	0.646089	6.50319	0.457807	0.00612457	Up regulated
A_22_P00020408	lnc-INTS8-1	lnc	3.35686	0.680965	4.67916	0.464424	0.0130443	Up regulated
A_21_P0003814	lnc-IRF2-2	lnc	6.49009	0.753163	7.55597	0.531891	0.0292608	Up regulated
A_21_P0009112	lnc-IRF8-4	lnc	2.93302	1.06323	1.7405	0.72144	0.047301	Down regulated
A_21_P0007624	lnc-ISCU-1	lnc	2.95101	1.03684	4.18481	0.814039	0.0450082	Up regulated
A_21_P0008852	lnc-ITGA11-2	lnc	2.94313	0.751663	1.79803	0.505673	0.0240599	Down regulated
A_21_P0008137	lnc-KATNAL1-3	lnc	2.31035	0.630596	5.18492	1.29926	0.00485156	Up regulated
A_21_P0007816	lnc-KCNA5-3	lnc	3.40076	0.408827	2.18366	1.14738	0.0312255	Down regulated
A_21_P0001001	lnc-KCNC4-1	lnc	2.08271	0.734782	1.04235	0.188174	0.0222316	Down regulated
A_22_P00008545	lnc-KCNMB1-3	lnc	2.81047	0.638931	1.3697	0.453904	0.00890861	Down regulated
A_22_P00008594	lnc-KCTD6-2	lnc	3.06264	1.06286	1.858	0.681828	0.044822	Down regulated
A_21_P0005611	lnc-KIAA1147-3	lnc	2.00277	0.757455	3.0792	0.753111	0.0371503	Up regulated
A_22_P00008750	lnc-KIDINS220-2	lnc	3.27565	0.779254	1.95143	0.869947	0.027688	Down regulated
A_21_P0006891	lnc-KIF20B-1	lnc	3.0905	0.762781	1.77504	0.561344	0.0187726	Down regulated
A_21_P0005583	lnc-KRBA1-1	lnc	2.88369	0.632558	1.69054	0.771873	0.0240599	Down regulated
A_22_P00009058	lnc-LENG9-1	lnc	5.02027	0.282726	3.9864	0.500621	0.00697567	Down regulated
A_21_P0007217	lnc-LGALS12-2	lnc	5.72876	0.662521	7.52154	0.628231	0.00639973	Up regulated
A_21_P0003617	lnc-LPHN3-6	lnc	1.38969	0.119578	2.55506	0.952434	0.0187171	Up regulated
A_22_P00022745	lnc-LRGUK-1	lnc	7.11703	0.299674	8.67726	0.261364	0.000347065	Up regulated
A_22_P00023453	lnc-LRMP-3	lnc	2.94772	0.723406	4.07734	0.856501	0.0357716	Up regulated
A_22_P00019857	lnc-LRRC31-1	lnc	2.13424	0.476174	3.3741	0.623255	0.0116526	Up regulated
A_22_P00009296	lnc-LRRC36-1	lnc	7.42726	0.371466	6.06428	0.576959	0.00521529	Down regulated
A_21_P0003161	lnc-LRRC58-1	lnc	2.473	1.05424	1.13148	0.324031	0.028983	Down regulated
A_22_P00009356	lnc-LRRTM1-2	lnc	4.22934	0.755578	5.33614	0.223674	0.0204542	Up regulated
A_21_P0005723	lnc-LY96-2	lnc	2.24523	0.856423	1.1028	0.0436685	0.0241076	Down regulated
A_22_P00019993	lnc-MANSC4-3	lnc	1.37083	0.217947	3.8999	2.87302	0.0390433	Up regulated
A_22_P00019484	lnc-MARVELD3-1	lnc	5.88143	0.914974	4.75342	0.775167	0.0437655	Down regulated
A_21_P0009590	lnc-MBP-1	lnc	7.5047	1.48907	9.13117	0.136317	0.0381348	Up regulated
A_21_P0007505	lnc-MLXIP-1	lnc	1.34344	0.367738	2.78464	1.03711	0.0164838	Up regulated
A_22_P00019536	lnc-MMD-4	lnc	5.91798	1.13808	3.89132	1.35988	0.0265605	Down regulated
A_22_P00010046	lnc-MOCS1-1	lnc	4.21321	0.141671	3.01167	1.44776	0.0442286	Down regulated
A_22_P00010107	lnc-MRGPRF-1	lnc	3.35852	0.46093	4.66105	1.2699	0.0338886	Up regulated
A_22_P00010124	lnc-MRPL16-1	lnc	3.28666	1.18488	1.77524	0.928087	0.0390299	Down regulated
A_22_P00010132	lnc-MRPL3-2	lnc	3.71934	0.805129	2.35456	1.3663	0.0462087	Down regulated
A_21_P0003180	lnc-MSL2-1	lnc	3.11514	0.784049	1.70159	0.844441	0.0234197	Down regulated
A_21_P0006742	lnc-MTPAP-2	lnc	3.1915	0.892306	2.01858	0.782432	0.0393839	Down regulated
A_22_P00010374	lnc-MYH13-2	lnc	1.78716	0.403646	3.11063	0.763785	0.0115779	Up regulated
A_22_P00022611	lnc-NBAS-1	lnc	3.18125	0.700747	2.14895	0.827115	0.039907	Down regulated
A_21_P0010331	lnc-NCF4-2	lnc	5.70736	1.26823	7.04766	0.668356	0.0481662	Up regulated
A_21_P0010093	lnc-NCOA3-9	lnc	2.81217	0.716796	4.12316	0.0851214	0.0107779	Up regulated
A_22_P00010587	lnc-NDNL2-1	lnc	3.45076	0.642099	2.19225	0.932291	0.0272676	Down regulated
A_21_P0009766	lnc-NFKBID-1	lnc	1.65298	0.888212	2.96558	1.1471	0.0435905	Up regulated
A_21_P0009091	lnc-NME4-1	lnc	4.39689	0.719931	3.22276	0.350663	0.0178193	Down regulated
A_21_P0008361	lnc-NRXN3-1	lnc	3.60259	0.56577	2.40975	0.67788	0.018127	Down regulated
A_22_P00011051	lnc-NTRK2-2	lnc	3.82111	1.19866	1.67672	0.771693	0.0158577	Down regulated
A_22_P00011075	lnc-NUBP1-1	lnc	2.4603	0.711144	1.43314	0.78382	0.0390433	Down regulated
A_21_P0001381	lnc-NUF2-2	lnc	2.60556	0.642648	1.5205	0.628419	0.0248762	Down regulated
A_21_P0011200	lnc-NUPL1-2	lnc	3.47543	0.812998	1.80041	0.312961	0.00855545	Down regulated
A_21_P0008849	lnc-ONECUT1-1	lnc	2.47595	1.04296	1.33286	0.453706	0.0423474	Down regulated
A_22_P00025112	lnc-OPN4-2	lnc	10.8243	0.468523	11.8608	0.205424	0.00696481	Up regulated
A_21_P0005333	lnc-PAX4-1	lnc	4.47972	0.616827	5.92172	0.287381	0.00606065	Up regulated
A_21_P0010442	lnc-PDGFB-1	lnc	3.74027	0.897212	1.87272	0.778663	0.0130443	Down regulated
A_22_P00011829	lnc-PHF3-1	lnc	2.2747	1.02803	1.05074	0.0163267	0.0312255	Down regulated
A_22_P00025927	lnc-PHYHIPL-1	lnc	2.43281	0.857718	1.37668	0.517418	0.0369958	Down regulated
A_21_P0005573	lnc-PIK3CG-2	lnc	7.81103	0.600363	8.91253	0.388965	0.0150091	Up regulated
A_22_P00011968	lnc-PLA2G15-2	lnc	3.80111	0.724618	2.61652	0.949004	0.0360043	Down regulated
A_22_P00011978	lnc-PLA2G6-1	lnc	3.01675	0.80058	1.93858	0.917987	0.047024	Down regulated
A_21_P0006897	lnc-PLCE1-1	lnc	2.38669	0.908629	1.34101	0.610235	0.0442286	Down regulated
A_22_P00023652	lnc-PLEKHJ1-1	lnc	2.56962	0.740519	1.42561	0.44692	0.0222316	Down regulated
A_21_P0006568	lnc-PLP1-1	lnc	1.55588	0.399453	2.85299	1.29571	0.0339258	Up regulated
A_22_P00012106	lnc-PODN-1	lnc	7.91018	0.50954	6.68682	0.682562	0.0150091	Down regulated
A_21_P0008704	lnc-POTEB-4	lnc	1.88118	0.871989	3.18868	0.397304	0.0212083	Up regulated
A_21_P0006234	lnc-PPAPDC3-2	lnc	1.86941	0.784572	2.92398	0.65337	0.0363694	Up regulated
A_21_P0013922	lnc-PPIE-1	lnc	5.00797	0.419029	3.76232	0.904675	0.0192897	Down regulated
A_22_P00012248	lnc-PPP1R12B-1	lnc	5.68016	0.595674	6.84054	0.361727	0.0121709	Up regulated
A_21_P0006242	lnc-PPP1R26-2	lnc	7.02734	0.432423	8.05936	0.652287	0.0182033	Up regulated
A_22_P00012271	lnc-PPP1R3D-2	lnc	2.8492	0.648739	1.58963	0.863552	0.0249717	Down regulated
A_33_P3209167	lnc-PQLC2-1	lnc	2.45598	0.616187	1.35157	0.348184	0.0148499	Down regulated
A_21_P0006533	lnc-PRICKLE3-1	lnc	3.23412	0.979274	1.92184	0.985727	0.0420808	Down regulated
A_21_P0006321	lnc-PTGES2-1	lnc	4.96544	0.511497	6.46258	0.669032	0.00799036	Up regulated
A_22_P00012581	lnc-PTPN14-1	lnc	2.40725	0.949069	1.34676	0.0474778	0.0360043	Down regulated
A_33_P3248097	lnc-QKI-3	lnc	1.34132	0.209896	3.10725	1.82862	0.032397	Up regulated
A_22_P00012677	lnc-QPCT-2	lnc	2.89412	0.691965	1.50333	0.450817	0.0117334	Down regulated
A_21_P0006200	lnc-RAD23B-3	lnc	2.55153	1.04561	1.05045	0.0526187	0.0200788	Down regulated
A_21_P0006206	lnc-RAD23B-7	lnc	2.32482	0.765376	3.38918	0.362153	0.0255361	Up regulated
A_21_P0006207	lnc-RAD23B-8	lnc	2.92612	0.515424	4.25554	1.11817	0.0270312	Up regulated
A_22_P00012772	lnc-RAI1-1	lnc	6.93085	0.453975	5.80107	0.850707	0.0230808	Down regulated
A_22_P00020486	lnc-RARRES2-3	lnc	5.73842	0.520762	6.75703	0.763401	0.0277427	Up regulated
A_22_P00012820	lnc-RARS-1	lnc	5.22951	0.620954	3.94764	1.07708	0.0312255	Down regulated
A_22_P00012847	lnc-RASAL1-1	lnc	3.91	0.875035	4.92167	0.702281	0.0486754	Up regulated
A_21_P0005971	lnc-RBM12B-2	lnc	4.84385	0.650773	3.73041	0.72338	0.027065	Down regulated
A_22_P00012968	lnc-RELL2-1	lnc	4.69259	0.671979	3.42909	1.30322	0.044822	Down regulated
A_22_P00013089	lnc-RHPN1-2	lnc	4.08438	0.485682	6.12413	0.734062	0.00305064	Up regulated
A_22_P00022828	lnc-RLBP1-1	lnc	2.6265	0.639602	1.42614	0.655419	0.0200788	Down regulated
A_33_P3683362	lnc-RNF125-2	lnc	5.86041	0.510644	4.69773	0.465168	0.0106476	Down regulated
A_21_P0008443	lnc-RP11-1085N6.3.1-2	lnc	4.67563	0.591248	6.29786	0.467092	0.00508716	Up regulated
A_19_P00327406	lnc-RP11-150O12.1.1-1	lnc	2.55989	1.00935	1.30749	0.512148	0.0339926	Down regulated
A_21_P0007869	lnc-RP11-277P12.7.1-3	lnc	5.70221	0.947963	7.46143	0.923179	0.0197047	Up regulated
A_22_P00013536	lnc-RP11-422N16.3.1-1	lnc	7.22728	0.542718	8.49237	0.264493	0.00612457	Up regulated
A_22_P00019968	lnc-RP11-582J16.5.1-4	lnc	2.32092	0.879878	3.79717	1.06281	0.0310828	Up regulated
A_22_P00013672	lnc-RP11-687M24.8.1-1	lnc	2.24223	0.952509	3.33577	0.247658	0.0357716	Up regulated
A_21_P0009532	lnc-RP11-863N1.2.1-5	lnc	4.16113	0.679226	2.96412	1.2258	0.046389	Down regulated
A_22_P00013954	lnc-RTDR1-1	lnc	1.73952	0.658026	2.93915	1.24652	0.046389	Up regulated
A_22_P00013974	lnc-RTN4-1	lnc	2.1828	0.590853	3.41905	1.01492	0.0298096	Up regulated
A_21_P0001443	lnc-RYR2-2	lnc	5.21914	1.05936	3.63937	1.30257	0.0406165	Down regulated
A_21_P0003908	lnc-SCRG1-1	lnc	1.70015	0.432841	2.98656	1.17543	0.0294423	Up regulated
A_22_P00014167	lnc-SCRN3-3	lnc	2.60194	0.611971	3.95857	0.508564	0.0104908	Up regulated
A_22_P00014262	lnc-SEMA6C-1	lnc	5.66873	0.790637	4.25235	1.12817	0.0326449	Down regulated
A_22_P00020842	lnc-SEPHS2-2	lnc	2.34685	0.721212	3.35813	0.666999	0.0360043	Up regulated
A_22_P00018812	lnc-SEZ6-1	lnc	3.51007	1.07235	1.91038	0.877218	0.0286137	Down regulated
A_21_P0008666	lnc-SH3GL3-1	lnc	2.71655	0.819679	1.56716	0.553672	0.0292292	Down regulated
A_22_P00014730	lnc-SLC2A4RG-1	lnc	4.00139	0.627657	5.92521	0.35737	0.00247318	Up regulated
A_21_P0009359	lnc-SLC39A11-1	lnc	3.07626	0.744116	2.05662	0.702769	0.0383079	Down regulated
A_22_P00014871	lnc-SLC6A12-4	lnc	2.35366	0.905366	4.05982	1.17278	0.0255588	Up regulated
A_21_P0007955	lnc-SLITRK5-3	lnc	1.14655	0.146379	2.2469	1.07902	0.0290704	Up regulated
A_22_P00014964	lnc-SMAD5-2	lnc	3.2473	0.945302	4.29688	0.513696	0.0437473	Up regulated
A_22_P00015007	lnc-SMOC2-1	lnc	1.55685	0.584549	2.86727	1.38587	0.0427129	Up regulated
A_22_P00015054	lnc-SNPH-1	lnc	3.77631	1.03077	4.81798	0.255753	0.0463475	Up regulated
A_22_P00015063	lnc-SNRPD3-2	lnc	7.94268	0.969176	5.17123	1.54868	0.0123109	Down regulated
A_22_P00015122	lnc-SNX20-5	lnc	9.26868	0.624194	10.3385	0.134724	0.0130443	Up regulated
A_22_P00015243	lnc-SPAG1-3	lnc	3.4761	0.821557	2.43855	0.232593	0.0291719	Down regulated
A_21_P0002342	lnc-SPAG16-4	lnc	2.59655	0.759938	1.2397	0.305792	0.0130443	Down regulated
A_22_P00015390	lnc-SRGAP3-1	lnc	8.17917	0.711448	6.37901	1.24669	0.0197933	Down regulated
A_21_P0009928	lnc-STK35-2	lnc	3.49023	0.453005	4.68624	0.97507	0.0253077	Up regulated
A_22_P00021162	lnc-STOML3-1	lnc	2.22	0.638633	0.981524	0.014264	0.00906271	Down regulated
A_21_P0008255	lnc-SUCLA2-1	lnc	3.89059	0.448583	2.7951	0.671665	0.0169715	Down regulated
A_22_P00015646	lnc-SUSD1-1	lnc	3.36011	0.959391	4.43621	0.661514	0.0475852	Up regulated
A_21_P0001486	lnc-TAF12-3	lnc	5.93414	0.58355	7.1426	0.349793	0.0100519	Up regulated
A_22_P00015751	lnc-TAF1C-1	lnc	5.76544	0.437534	6.94921	0.672338	0.0130443	Up regulated
A_22_P00015819	lnc-TBC1D12-1	lnc	1.80459	0.69408	3.51508	1.44854	0.0281072	Up regulated
A_21_P0010423	lnc-TBC1D22A-1	lnc	1.91885	0.657985	2.93779	0.926078	0.0435931	Up regulated
A_21_P0010129	lnc-TCFL5-2	lnc	3.5316	0.382445	1.77321	0.969624	0.00799036	Down regulated
A_21_P0010070	lnc-TCFL5-3	lnc	1.72019	0.536862	2.8628	0.551139	0.0148421	Up regulated
A_21_P0006134	lnc-TEK-2	lnc	3.7858	1.24753	1.88455	1.02532	0.02719	Down regulated
A_22_P00015975	lnc-TELO2-3	lnc	5.05479	0.660191	6.64347	0.426126	0.00646979	Up regulated
A_22_P00016082	lnc-THBS3-1	lnc	2.31188	0.914314	1.28062	0.350644	0.0388567	Down regulated
A_21_P0013955	lnc-TMEM18-12	lnc	5.48349	1.01584	3.68939	1.61381	0.0387916	Down regulated
A_22_P00016419	lnc-TMEM234-1	lnc	3.56328	1.36277	1.86854	0.496966	0.0312255	Down regulated
A_21_P0009388	lnc-TMEM98-1	lnc	4.33774	0.843611	2.95841	0.987681	0.0318339	Down regulated
A_22_P00025825	lnc-TMEM99-4	lnc	4.27905	0.93687	3.15665	0.597995	0.0397805	Down regulated
A_22_P00016500	lnc-TMPRSS11E-1	lnc	4.28309	1.08309	5.58674	0.952169	0.0475852	Up regulated
A_21_P0007600	lnc-TMTC3-5	lnc	5.83147	0.781416	4.73424	0.809286	0.0391479	Down regulated
A_22_P00016529	lnc-TMTC3-6	lnc	6.38947	0.835586	4.87731	1.1794	0.0315367	Down regulated
A_21_P0001097	lnc-TNFRSF9-1	lnc	5.0831	0.811731	3.67206	0.648223	0.0196369	Down regulated
A_21_P0002541	lnc-TNP1-2	lnc	2.90245	0.967752	1.27775	0.0356928	0.0132981	Down regulated
A_21_P0001800	lnc-TNP1-3	lnc	3.85006	0.509334	5.24372	0.721335	0.0114228	Up regulated
A_22_P00020086	lnc-TOX4-1	lnc	1.49151	0.212177	2.54809	0.816536	0.0180422	Up regulated
A_22_P00016664	lnc-TPCN2-5	lnc	4.0611	0.512764	2.88468	0.530813	0.0121185	Down regulated
A_21_P0008156	lnc-TPT1-1	lnc	1.54333	0.611882	3.50709	0.968394	0.00856292	Up regulated
A_22_P00016696	lnc-TRA2A-1	lnc	11.642	0.504852	12.9801	0.202123	0.00372339	Up regulated
A_21_P0001055	lnc-TRAF5-4	lnc	2.49232	0.448464	1.39686	0.875954	0.0255361	Down regulated
A_22_P00016739	lnc-TREX1-2	lnc	3.19088	0.88095	1.78536	0.523748	0.0200788	Down regulated
A_22_P00020240	lnc-TRPT1-2	lnc	2.84082	0.849975	1.81878	0.570484	0.040422	Down regulated
A_19_P00811264	lnc-TSHZ1-1	lnc	5.77443	0.990042	6.80567	0.41406	0.0467507	Up regulated
A_22_P00016937	lnc-TSPAN5-2	lnc	3.46183	1.14104	1.9966	0.863534	0.0378906	Down regulated
A_21_P0002195	lnc-TTC27-1	lnc	1.13567	0.273286	2.26842	1.27572	0.0406165	Up regulated
A_22_P00017043	lnc-TTLL7-7	lnc	2.71162	1.02352	4.12593	0.617034	0.0286137	Up regulated
A_21_P0008083	lnc-UCHL3-5	lnc	5.43811	1.19	7.26055	0.735981	0.0228784	Up regulated
A_22_P00017211	lnc-UEVLD-2	lnc	3.83046	0.890589	4.99545	0.890165	0.0438055	Up regulated
A_22_P00017251	lnc-UNC5CL-3	lnc	3.2235	1.59112	1.57371	0.667451	0.0473047	Down regulated
A_22_P00017260	lnc-UNG-1	lnc	5.49871	0.580214	4.48948	0.492679	0.0202444	Down regulated
A_22_P00025866	lnc-VMO1-1	lnc	4.6016	0.36921	3.46917	0.385401	0.00484861	Down regulated
A_22_P00017487	lnc-VWA3B-1	lnc	5.46912	0.418135	6.86501	0.679451	0.0079543	Up regulated
A_22_P00017498	lnc-VWF-2	lnc	14.1871	0.249622	15.1993	0.238385	0.00127522	Up regulated
A_21_P0005184	lnc-WDR27-1	lnc	4.52112	1.47555	2.84389	0.841596	0.0425699	Down regulated
A_21_P0005590	lnc-WDR60-1	lnc	5.66392	0.581826	4.5703	0.333462	0.012967	Down regulated
A_22_P00017650	lnc-WRAP73-1	lnc	5.57033	0.758053	3.15259	1.28282	0.0098284	Down regulated
A_21_P0005697	lnc-XKR4-2	lnc	3.01198	0.88027	1.6769	0.806734	0.0298096	Down regulated
A_22_P00023857	lnc-YPEL5-3	lnc	3.44377	1.01846	1.84172	1.00073	0.0292292	Down regulated
A_22_P00023628	lnc-ZC3H14-1	lnc	3.26877	0.474412	2.23012	0.824576	0.0273913	Down regulated
A_21_P0010123	lnc-ZFP64-4	lnc	1.37246	0.373828	2.4023	1.12205	0.041771	Up regulated
A_22_P00017960	lnc-ZKSCAN1-1	lnc	9.06133	0.854968	10.3447	0.552058	0.0243823	Up regulated
A_22_P00021804	lnc-ZNF217-3	lnc	2.81457	0.966782	1.67869	0.178601	0.0329673	Down regulated
A_22_P00018036	lnc-ZNF236-1	lnc	7.64469	1.11505	6.54958	0.128775	0.0475852	Down regulated
A_22_P00018123	lnc-ZNF484-1	lnc	2.99638	1.33819	4.52675	1.02217	0.0482151	Up regulated
A_21_P0009662	lnc-ZNF507-4	lnc	3.52439	0.428269	2.50739	0.60209	0.0165317	Down regulated
A_21_P0006494	lnc-ZNF673-2	lnc	3.64902	1.26068	5.2666	0.716355	0.0327973	Up regulated
A_22_P00007434	LOC100128079	LOC	1.61385	0.645518	2.89943	0.908737	0.025222	Up regulated
A_33_P3709525	LOC100128233	LOC	1.57062	0.397324	2.7003	0.887471	0.0228784	Up regulated
A_33_P3362208	LOC100129233	LOC	3.64436	0.998513	2.23597	1.03459	0.0388567	Down regulated
A_21_P0001085	LOC100130417	LOC	4.83559	1.16661	3.31224	0.401571	0.027688	Down regulated
A_19_P00812135	LOC100130417	LOC	4.2957	0.485865	2.61489	0.846025	0.00810064	Down regulated
A_33_P3239914	LOC100130741	LOC	3.91825	0.50059	2.55358	0.27438	0.00385388	Down regulated
A_24_P298495	LOC100130744	LOC	4.18577	0.640587	1.92865	0.618845	0.00247813	Down regulated
A_33_P3283897	LOC100130761	LOC	2.80639	1.12362	1.3827	0.524622	0.0317128	Down regulated
A_33_P3310548	LOC100131131	LOC	2.57797	0.723319	1.52966	0.682766	0.0338886	Down regulated
A_33_P3375170	LOC100131242	LOC	5.33718	1.02863	3.67003	0.125743	0.0152005	Down regulated
A_33_P3632937	LOC100131262	LOC	8.06553	0.822499	9.08024	0.516062	0.0374148	Up regulated
A_22_P00009701	LOC100131655	LOC	7.53196	0.308781	9.00368	0.181478	0.000347065	Up regulated
A_33_P3275630	LOC100131820	LOC	3.5665	0.755463	2.03746	1.21399	0.0292292	Down regulated
A_21_P0000577	LOC100289511	LOC	3.16253	0.947478	1.72028	0.492552	0.0214483	Down regulated
A_19_P00318154	LOC100293612	LOC	3.14675	0.74449	2.13758	0.780477	0.0426476	Down regulated
A_22_P00001875	LOC100419583	LOC	8.03123	0.61259	9.20666	0.622673	0.0188655	Up regulated
A_22_P00018166	LOC100505622	LOC	2.81028	0.734323	3.88057	0.990006	0.0473812	Up regulated
A_22_P00010045	LOC100505635	LOC	4.20189	0.559762	2.63377	0.992512	0.0156908	Down regulated
A_19_P00317337	LOC100506047	LOC	2.53145	0.631714	3.58835	0.427099	0.0193529	Up regulated
A_19_P00316371	LOC100506178	LOC	4.19328	0.6505	2.18588	1.30454	0.015261	Down regulated
A_21_P0008517	LOC100506476	LOC	6.00443	1.24991	4.72024	0.536387	0.0482944	Down regulated
A_22_P00022017	LOC100506801	LOC	2.60437	0.726009	3.73896	0.331368	0.0193529	Up regulated
A_21_P0012458	LOC100506990	LOC	6.74822	0.90855	5.30661	0.389641	0.0184599	Down regulated
A_22_P00006229	LOC100507054	LOC	4.92287	0.813305	3.39335	0.916899	0.0222435	Down regulated
A_32_P213965	LOC100507205	LOC	2.39842	0.662057	1.11085	0.0656489	0.00906271	Down regulated
A_19_P00320343	LOC100507403	LOC	2.88582	0.959061	1.58274	0.833276	0.0366845	Down regulated
A_21_P0013985	LOC100507494	LOC	1.65319	0.593257	3.01355	0.761451	0.0158577	Up regulated
A_22_P00007404	LOC100507557	LOC	2.93992	1.54011	1.39774	0.435506	0.0476849	Down regulated
A_21_P0005189	LOC100507642	LOC	6.23296	0.870278	7.24938	0.446629	0.0388561	Up regulated
A_21_P0009625	LOC100996324	LOC	1.95352	1.19516	3.42289	0.3379	0.0308262	Up regulated
A_22_P00003189	LOC100996348	LOC	4.00801	0.519675	2.75849	1.13637	0.0322196	Down regulated
A_22_P00009259	LOC100996404	LOC	3.8113	0.731172	2.5029	0.397552	0.0146917	Down regulated
A_22_P00022855	LOC100996437	LOC	5.17101	0.720705	4.05835	0.81778	0.0350091	Down regulated
A_32_P325823	LOC100996634	LOC	1.13093	0.0452203	2.39508	1.59923	0.0486152	Up regulated
A_22_P00005659	LOC101060038	LOC	2.39597	1.40778	5.50433	1.37765	0.0126661	Up regulated
A_22_P00012973	LOC101926933	LOC	2.64291	1.05745	1.41938	0.724555	0.0441904	Down regulated
A_21_P0002074	LOC101927070	LOC	3.06087	0.819004	1.95455	0.73675	0.0381783	Down regulated
A_22_P00011278	LOC101927120	LOC	2.15511	0.600954	1.04714	0.18457	0.0114228	Down regulated
A_21_P0001781	LOC101927156	LOC	2.84743	0.861007	4.10671	0.769682	0.0318642	Up regulated
A_22_P00018575	LOC101927164	LOC	7.01987	0.548201	5.37829	0.899343	0.0114228	Down regulated
A_21_P0013027	LOC101927189	LOC	3.1152	0.557999	1.97497	0.725582	0.0214483	Down regulated
A_22_P00020465	LOC101927344	LOC	2.34846	1.10151	3.5665	0.555636	0.04311	Up regulated
A_22_P00019516	LOC101927365	LOC	2.62894	0.941036	3.86849	0.43912	0.029149	Up regulated
A_21_P0009407	LOC101927471	LOC	2.9684	0.621848	1.10053	0.0337159	0.0018992	Down regulated
A_33_P3278330	LOC101927533	LOC	2.65989	0.999234	1.4777	0.538271	0.0384141	Down regulated
A_21_P0007498	LOC101927592	LOC	4.63773	0.899631	3.27527	0.843043	0.0305278	Down regulated
A_22_P00014610	LOC101927592	LOC	5.61683	0.296827	3.45432	1.77264	0.0193796	Down regulated
A_22_P00007165	LOC101927598	LOC	2.76377	0.591988	1.76118	0.818864	0.0357716	Down regulated
A_21_P0008513	LOC101927598	LOC	2.2264	0.67574	1.17468	0.0197374	0.016606	Down regulated
A_22_P00015605	LOC101927620	LOC	5.30528	0.791284	6.35209	0.717935	0.0397182	Up regulated
A_21_P0012036	LOC101927641	LOC	2.30338	0.785787	0.977854	0.0182506	0.0130443	Down regulated
A_22_P00004596	LOC101927815	LOC	3.36506	0.620616	2.26436	0.810988	0.029855	Down regulated
A_21_P0009917	LOC101927842	LOC	3.90945	1.02762	5.15391	0.451791	0.0344175	Up regulated
A_22_P00009092	LOC101927902	LOC	3.66737	0.51639	4.83569	0.197523	0.00614464	Up regulated
A_22_P00010128	LOC101927907	LOC	1.69952	0.501155	3.02843	1.32097	0.0360043	Up regulated
A_22_P00023360	LOC101927969	LOC	9.35306	0.668128	8.05712	1.07576	0.0322579	Down regulated
A_22_P00008912	LOC101928100	LOC	3.479	1.19756	5.04528	1.01222	0.0388567	Up regulated
A_22_P00016017	LOC101928117	LOC	3.99189	1.21284	5.42177	0.293905	0.0332219	Up regulated
A_22_P00001097	LOC101928118	LOC	4.5366	0.737658	3.34365	0.774719	0.0292292	Down regulated
A_22_P00019177	LOC101928118	LOC	2.71027	0.405792	1.62877	0.755136	0.0193529	Down regulated
A_21_P0014683	LOC101928188	LOC	2.47465	0.694449	1.22234	0.268714	0.012765	Down regulated
A_21_P0011499	LOC101928203	LOC	6.6078	0.381006	7.7144	0.531669	0.00928871	Up regulated
A_21_P0009270	LOC101928205	LOC	1.39001	0.316001	2.96485	1.93892	0.0476849	Up regulated
A_21_P0013808	LOC101928228	LOC	5.19924	0.827756	4.0779	0.739028	0.03773	Down regulated
A_22_P00013949	LOC101928233	LOC	2.89745	0.942175	1.55142	0.563138	0.0260381	Down regulated
A_33_P3389802	LOC101928235	LOC	2.31048	0.616877	3.34326	0.362466	0.01805	Up regulated
A_22_P00003496	LOC101928354	LOC	1.81631	0.739371	3.19467	0.842159	0.0228977	Up regulated
A_21_P0007531	LOC101928387	LOC	3.09052	0.648624	1.34924	0.70966	0.00799036	Down regulated
A_22_P00004651	LOC101928448	LOC	5.24415	1.00603	4.03704	0.599851	0.0387868	Down regulated
A_22_P00018045	LOC101928530	LOC	3.81859	0.666739	2.52069	1.12371	0.0341178	Down regulated
A_19_P00805950	LOC101928673	LOC	7.74996	0.529771	9.2261	0.335508	0.00394124	Up regulated
A_19_P00319140	LOC101928682	LOC	2.47579	0.811645	1.45042	0.475378	0.0344175	Down regulated
A_22_P00014433	LOC101928741	LOC	4.1008	1.41004	2.42347	0.794186	0.0385899	Down regulated
A_22_P00021964	LOC101928813	LOC	8.41688	0.60019	9.69557	0.62309	0.0149027	Up regulated
A_22_P00025731	LOC101928819	LOC	3.06968	1.11193	1.49396	0.787588	0.0292292	Down regulated
A_22_P00018268	LOC101928824	LOC	5.19255	0.464829	4.18275	0.570862	0.0173958	Down regulated
A_19_P00316242	LOC101928858	LOC	1.95837	0.529982	3.25796	0.718558	0.0144022	Up regulated
A_22_P00025922	LOC101929007	LOC	3.72661	0.758961	4.83309	0.399665	0.0239746	Up regulated
A_21_P0008754	LOC101929129	LOC	3.92503	0.820485	5.18197	0.859606	0.0327967	Up regulated
A_21_P0014726	LOC101929188	LOC	5.80535	0.2698	4.73605	0.81878	0.0187171	Down regulated
A_22_P00019654	LOC101929217	LOC	3.49173	0.772201	4.74729	0.526736	0.0205465	Up regulated
A_21_P0004097	LOC101929261	LOC	2.12552	1.06315	0.984763	0.0211258	0.0390864	Down regulated
A_21_P0013022	LOC101929309	LOC	3.10797	0.997389	1.80142	0.993585	0.0435931	Down regulated
A_21_P0012320	LOC101929374	LOC	5.39491	0.9874	7.04296	0.569499	0.0180422	Up regulated
A_22_P00025057	LOC101929636	LOC	2.70328	0.945905	1.57206	0.68879	0.042823	Down regulated
A_21_P0004373	LOC101929681	LOC	1.24266	0.0914122	2.64906	1.42241	0.0302436	Up regulated
A_33_P3233819	LOC101929989	LOC	3.6178	0.821843	1.86586	1.02248	0.0184599	Down regulated
A_33_P3356587	LOC101929998	LOC	4.15672	1.05909	2.82148	0.677912	0.0360043	Down regulated
A_22_P00015660	LOC101930316	LOC	3.85091	1.1634	2.46482	0.779212	0.0411951	Down regulated
A_33_P3353190	LOC101930611	LOC	5.19049	0.758271	3.37826	0.936146	0.0131648	Down regulated
A_22_P00012878	LOC102723373	LOC	3.60204	0.758911	4.77475	0.597931	0.0255361	Up regulated
A_21_P0008850	LOC102723493	LOC	7.61953	0.799037	6.42045	0.974534	0.0397182	Down regulated
A_21_P0003571	LOC102723525	LOC	2.16169	1.10975	1.05797	0.0415512	0.0459547	Down regulated
A_33_P3257817	LOC102723701	LOC	12.2085	0.285158	13.4793	0.166064	0.000347065	Up regulated
A_22_P00017802	LOC102723831	LOC	1.31169	0.0905853	2.50962	1.18539	0.0290694	Up regulated
A_21_P0003299	LOC102723877	LOC	3.28331	0.613594	2.17246	0.981008	0.0372407	Down regulated
A_21_P0007818	LOC102723921	LOC	1.09571	0.277257	2.50911	1.20827	0.0223967	Up regulated
A_21_P0011896	LOC102723927	LOC	3.5822	0.546835	2.38786	0.891824	0.0251615	Down regulated
A_21_P0009778	LOC102723931	LOC	4.11594	0.589727	2.59606	0.542243	0.00721163	Down regulated
A_33_P3283206	LOC102723979	LOC	3.15684	0.422443	2.01759	0.365898	0.00593345	Down regulated
A_21_P0002682	LOC102724081	LOC	2.58706	0.842587	1.53354	0.655641	0.0403908	Down regulated
A_22_P00019232	LOC102724153	LOC	8.9432	0.676348	7.49705	1.11525	0.0265605	Down regulated
A_22_P00007298	LOC102724220	LOC	3.36489	0.484075	1.7515	0.786146	0.00796138	Down regulated
A_33_P3422253	LOC102724233	LOC	4.89791	1.15388	6.15495	0.653676	0.0464931	Up regulated
A_22_P00022873	LOC102724532	LOC	8.62423	0.795613	7.02623	0.472578	0.0110081	Down regulated
A_21_P0004520	LOC102724720	LOC	2.42893	0.669338	1.29962	0.500936	0.0200788	Down regulated
A_22_P00021622	LOC102724915	LOC	1.43208	0.277308	2.51945	1.30099	0.0463475	Up regulated
A_22_P00002420	LOC102724917	LOC	1.31045	0.0919631	2.44493	0.898598	0.0173958	Up regulated
A_21_P0007180	LOC102724957	LOC	6.04052	1.06494	4.03061	1.62938	0.031922	Down regulated
A_22_P00008813	LOC102725022	LOC	8.90148	0.620428	10.0751	0.498531	0.0158577	Up regulated
A_24_P417352	LOC102725284	LOC	13.7195	1.38434	15.2403	0.844544	0.047024	Up regulated
A_21_P0005858	LOC102725309	LOC	1.11559	0.0289476	2.28799	1.15293	0.0282693	Up regulated
A_22_P00016482	LOC148413	LOC	5.42599	0.420034	4.10698	0.627848	0.00810064	Down regulated
A_24_P781757	LOC148413	LOC	6.54694	0.402764	5.24969	0.334402	0.00290438	Down regulated
A_33_P3217403	LOC149373	LOC	2.52298	1.18277	1.29097	0.54931	0.0478876	Down regulated
A_22_P00015348	LOC283335	LOC	4.95291	0.53269	3.56508	1.05713	0.0228784	Down regulated
A_33_P3336587	LOC283710	LOC	6.44491	0.913692	7.56851	0.628757	0.0391479	Up regulated
A_33_P3663105	LOC284263	LOC	1.94238	0.483916	3.01002	0.281384	0.00808536	Up regulated
A_21_P0000909	LOC284600	LOC	3.25889	1.00344	1.72928	0.716343	0.0248891	Down regulated
A_21_P0010155	LOC284825	LOC	7.14605	0.886482	5.76575	0.66746	0.0243823	Down regulated
A_21_P0010228	LOC284825	LOC	8.24509	0.834161	5.96673	1.57696	0.0186728	Down regulated
A_21_P0010154	LOC284825	LOC	5.4672	0.604633	3.33659	1.47492	0.0158577	Down regulated
A_21_P0010307	LOC284825	LOC	7.36401	0.854557	5.55872	0.900488	0.0154181	Down regulated
A_32_P491499	LOC285191	LOC	5.48986	0.906738	3.68934	1.79559	0.0412751	Down regulated
A_33_P3323979	LOC339874	LOC	3.51702	0.885784	1.85385	0.951006	0.020948	Down regulated
A_33_P3818787	LOC344967	LOC	2.75537	0.483537	4.3354	0.75448	0.00786462	Up regulated
A_22_P00004017	LOC389641	LOC	6.12475	1.05657	8.25814	0.885159	0.0136686	Up regulated
A_33_P3338491	LOC392196	LOC	3.92226	0.538931	4.96981	0.444352	0.0152005	Up regulated
A_33_P3372752	LOC400682	LOC	2.65456	0.547571	3.80584	0.874595	0.0263368	Up regulated
A_33_P3365392	LOC401557	LOC	6.05748	1.33733	4.66246	0.610501	0.0475852	Down regulated
A_21_P0013726	LOC403323	LOC	1.17964	0.200047	2.9115	2.17055	0.0481662	Up regulated
A_22_P00009535	LOC440390	LOC	2.41561	0.767538	1.30808	0.0338468	0.0200328	Down regulated
A_33_P3333177	LOC644083	LOC	3.23019	0.884578	4.77986	0.301134	0.0130443	Up regulated
A_33_P3360863	LOC644794	LOC	3.09127	0.557526	2.07318	0.78049	0.0305484	Down regulated
A_33_P3268522	LOC644794	LOC	2.15862	0.594918	1.11572	0.020016	0.0121185	Down regulated
A_33_P3418992	LOC645769	LOC	2.35609	0.546636	1.10831	0.0185892	0.00521253	Down regulated
A_33_P3306659	LOC728254	LOC	5.09438	1.02679	3.94923	0.41997	0.040191	Down regulated
A_33_P3718734	LOC729083	LOC	8.33311	0.359299	6.76945	1.25881	0.0200788	Down regulated
A_22_P00004982	LOC90768	LOC	2.86166	1.0092	1.52454	0.257406	0.0255361	Down regulated
A_33_P3271480	LOC90784	LOC	5.66937	0.647114	6.67391	0.139817	0.0174615	Up regulated
A_19_P00812190	XLOC_l2_000297	LOC	3.68806	1.18425	5.72779	1.08537	0.0223967	Up regulated
A_19_P00812944	XLOC_l2_001408	LOC	2.26218	0.718172	1.23452	0.197458	0.0217639	Down regulated
A_21_P0010895	XLOC_l2_002049	LOC	3.11264	0.731758	1.96928	0.763314	0.0312255	Down regulated
A_21_P0011005	XLOC_l2_002603	LOC	2.9122	0.861618	1.70614	0.894296	0.03947	Down regulated
A_21_P0011008	XLOC_l2_002651	LOC	5.00061	1.42733	7.59192	0.836573	0.0146087	Up regulated
A_21_P0011037	XLOC_l2_002886	LOC	2.10172	0.968542	3.41615	0.397315	0.025872	Up regulated
A_21_P0011339	XLOC_l2_004772	LOC	3.62271	0.297733	2.58963	0.806164	0.0202291	Down regulated
A_21_P0011482	XLOC_l2_005490	LOC	3.06896	0.828473	4.22202	0.410878	0.0257445	Up regulated
A_33_P3209404	XLOC_l2_006173	LOC	4.50153	0.583071	3.3433	1.18499	0.0429587	Down regulated
A_21_P0011810	XLOC_l2_007419	LOC	2.01857	0.769901	3.44194	0.962999	0.0256285	Up regulated
A_21_P0011823	XLOC_l2_007449	LOC	2.29104	0.862859	3.32848	0.361894	0.0345569	Up regulated
A_21_P0011921	XLOC_l2_008040	LOC	3.61873	0.320123	2.45328	0.964941	0.0228784	Down regulated
A_33_P3331426	XLOC_l2_008130	LOC	2.90634	0.810872	1.83062	0.41634	0.0294414	Down regulated
A_21_P0011959	XLOC_l2_008221	LOC	3.88804	0.594542	5.20757	0.963019	0.0239746	Up regulated
A_21_P0012138	XLOC_l2_008783	LOC	3.11188	0.500062	1.76108	0.223293	0.0036612	Down regulated
A_21_P0012494	XLOC_l2_009790	LOC	1.33219	0.158422	2.74301	1.62668	0.0404161	Up regulated
A_21_P0012387	XLOC_l2_009811	LOC	2.83955	0.854753	4.05978	0.986555	0.0418455	Up regulated
A_21_P0012397	XLOC_l2_009887	LOC	1.69557	0.526264	2.74383	0.906901	0.0334016	Up regulated
A_21_P0012656	XLOC_l2_011043	LOC	2.77418	0.920646	1.56823	0.73124	0.0373139	Down regulated
A_21_P0012897	XLOC_l2_011987	LOC	3.06156	0.862742	1.84008	0.592493	0.0289363	Down regulated
A_21_P0013056	XLOC_l2_012847	LOC	2.12968	0.938178	3.86094	0.786034	0.0175262	Up regulated
A_21_P0013286	XLOC_l2_013737	LOC	3.25731	0.421267	4.2712	0.948425	0.0337062	Up regulated
A_21_P0013304	XLOC_l2_013808	LOC	2.74528	1.0271	1.6103	0.667669	0.0476849	Down regulated
A_21_P0013479	XLOC_l2_014197	LOC	3.91507	1.06378	2.65414	0.76927	0.0432183	Down regulated
A_21_P0013497	XLOC_l2_014245	LOC	1.74831	0.538577	2.98004	0.719615	0.0169715	Up regulated
A_21_P0013558	XLOC_l2_014720	LOC	12.1973	0.610672	10.7912	0.454455	0.00852276	Down regulated
A_21_P0013609	XLOC_l2_015075	LOC	2.12431	0.778684	3.80249	1.12551	0.0218992	Up regulated
A_33_P3406714	XLOC_l2_015641	LOC	2.51842	0.826238	1.17122	0.022205	0.0148421	Down regulated
A_21_P0000307	SNORA2B	SNORA	10.5595	0.924827	9.15743	0.138559	0.0181975	Down regulated
A_21_P0000347	SNORA76C	SNORA	8.3303	1.0049	9.3719	0.207973	0.0431283	Up regulated
A_33_P3876591	SNORA76C	SNORA	3.22523	0.345002	2.12329	0.588079	0.0099833	Down regulated
A_21_P0000411	SNORD114-14	SNORD	2.80347	0.850283	1.65254	0.619461	0.0328466	Down regulated
A_33_P3235631			3.69127	2.1423	5.92421	1.11773	0.0495527	Up regulated
A_22_P00016430			8.07286	0.943998	7.02973	0.656437	0.0493695	Down regulated
A_22_P00006364			3.52329	1.21816	2.33248	0.245301	0.0489377	Down regulated
A_33_P3391316			3.8544	1.93561	1.79491	1.09333	0.0487794	Down regulated
A_24_P361816			11.5898	1.13765	12.7555	0.475686	0.0482944	Up regulated
A_33_P3298102			3.53769	0.604624	2.09132	1.66711	0.0481662	Down regulated
A_21_P0005745			1.22471	0.221495	2.66608	1.79626	0.0481559	Up regulated
A_33_P3379176			3.74981	1.0329	2.69496	0.404158	0.0480129	Down regulated
A_21_P0009182			1.48364	0.428569	2.55418	1.23722	0.0476849	Up regulated
A_19_P00810205			6.89701	1.06743	8.04861	0.614122	0.0476459	Up regulated
A_22_P00000134			7.56283	1.04811	6.25717	1.01276	0.0475852	Down regulated
A_22_P00015581			2.60807	1.23956	1.3186	0.554511	0.0475852	Down regulated
A_21_P0002804			1.74161	0.405858	2.80857	1.22832	0.0467277	Up regulated
A_33_P3308716			9.24794	1.25889	10.7912	1.13592	0.0466437	Up regulated
A_21_P0014882			3.44489	1.5507	1.81037	0.705038	0.0465097	Down regulated
A_33_P3231493			2.10023	1.08746	3.30495	0.673373	0.0464931	Up regulated
A_21_P0006734			4.38628	1.44434	2.83835	0.740716	0.0464931	Down regulated
A_33_P3393986			1.93175	0.778818	2.94595	0.813081	0.0463246	Up regulated
A_24_P212024			13.3237	1.11433	14.5144	0.542863	0.0460812	Up regulated
A_24_P136758			5.08835	1.068	3.81019	0.868218	0.0455175	Down regulated
A_22_P00005647			2.83202	1.4157	1.41819	0.0871192	0.0454921	Down regulated
A_33_P3399881			3.91612	0.711419	2.82994	1.00904	0.0454901	Down regulated
A_21_P0006016			1.93762	0.885772	2.94159	0.578784	0.0451805	Up regulated
A_22_P00015193			2.3534	1.08031	1.27096	0.0782622	0.0451719	Down regulated
A_24_P626951			13.2916	1.15668	14.5195	0.494519	0.0449741	Up regulated
A_33_P3262128			1.14857	0.0866753	2.94022	2.1845	0.0448825	Up regulated
A_22_P00018063			1.32421	0.301185	2.47942	1.3587	0.0447382	Up regulated
A_33_P3329176			4.69373	0.997981	5.8047	0.568102	0.0442098	Up regulated
A_33_P3424754			12.3484	1.30881	13.732	0.492459	0.0441495	Up regulated
A_22_P00013573			4.58814	0.676886	3.34392	1.25882	0.0440906	Down regulated
A_22_P00004303			3.2641	1.34897	4.82602	0.908952	0.0437473	Up regulated
A_33_P3374633			2.24009	0.970964	1.21593	0.33762	0.0437473	Down regulated
A_33_P3229968			2.30822	0.887849	3.4228	0.787131	0.0435905	Up regulated
A_22_P00016703			2.62529	0.664496	1.62113	0.893279	0.0435227	Down regulated
A_33_P3251557			3.54116	0.989427	4.5881	0.341742	0.0435139	Up regulated
A_21_P0003949			1.89883	0.563923	3.06078	1.20661	0.0430547	Up regulated
A_21_P0005290			1.83546	0.612202	3.15964	1.39327	0.0429781	Up regulated
A_33_P3281435			11.6643	1.13667	12.9001	0.48376	0.0428739	Up regulated
A_33_P3424832			1.39708	0.392515	2.65453	1.42043	0.0428739	Up regulated
A_22_P00019097			4.77104	0.717667	3.67127	0.969403	0.0426674	Down regulated
A_21_P0012113			3.3488	0.521834	2.33658	1.01379	0.0421352	Down regulated
A_33_P3424612			13.3044	1.17233	14.5443	0.302062	0.0421094	Up regulated
A_22_P00022348			3.37379	1.00858	4.47654	0.415138	0.0419467	Up regulated
A_22_P00024177			5.33515	2.00739	2.65395	1.99922	0.0419467	Down regulated
A_22_P00010264			3.98901	0.541781	2.96394	1.01213	0.0418844	Down regulated
A_33_P3262537			3.65137	1.12357	2.42921	0.434663	0.0418844	Down regulated
A_21_P0014908			7.89472	1.06669	6.3234	1.31464	0.0418464	Down regulated
A_22_P00019762			2.80546	1.16652	1.5238	0.494719	0.0418464	Down regulated
A_33_P3404221			2.12075	0.819209	3.1904	0.76202	0.0417904	Up regulated
A_33_P3351285			2.87435	1.20979	1.52111	0.587979	0.0417904	Down regulated
A_33_P3399985			9.26781	1.37287	10.8215	0.720079	0.0417741	Up regulated
A_22_P00003178			6.07425	1.11551	4.78252	0.643362	0.0409654	Down regulated
A_33_P3358789			2.39433	1.01306	1.32974	0.0962362	0.0409654	Down regulated
A_22_P00006656			2.65583	1.39695	1.1861	0.0296093	0.0406165	Down regulated
A_22_P00003331			5.03397	1.67152	3.23252	0.43027	0.0404161	Down regulated
A_33_P3337609			13.7225	1.04847	14.8882	0.424443	0.0403712	Up regulated
A_22_P00000625			2.41426	0.862934	1.3581	0.619422	0.0403586	Down regulated
A_33_P3258561			12.2141	0.769515	10.7876	1.35689	0.0402243	Down regulated
A_23_P61042			15.2825	1.07284	16.564	0.68661	0.0401536	Up regulated
A_24_P255845			3.62841	0.998175	4.75322	0.443912	0.0401115	Up regulated
A_21_P0005376			2.44872	0.938609	1.36156	0.503716	0.039907	Down regulated
A_22_P00024000			2.4331	1.27349	3.87384	0.575934	0.0398994	Up regulated
A_22_P00017839			3.97304	1.03051	5.12554	0.409425	0.0397182	Up regulated
A_22_P00018897			3.68538	0.866	2.52974	0.803776	0.0397182	Down regulated
A_22_P00011458			2.04891	0.66789	3.31408	1.20227	0.0396307	Up regulated
A_22_P00025410			1.42195	0.127403	2.61927	1.36701	0.0396307	Up regulated
A_21_P0014324			3.78273	0.989213	4.85148	0.19362	0.0395954	Up regulated
A_21_P0002576			1.32166	0.0640868	3.74652	2.77339	0.039222	Up regulated
A_33_P3281444			11.2699	1.16749	12.6082	0.546151	0.0391862	Up regulated
A_21_P0009709			2.44912	0.614223	1.44322	0.869522	0.0391862	Down regulated
A_22_P00003459			4.02593	0.851254	2.38947	1.55435	0.0391862	Down regulated
A_22_P00009866			3.5136	0.819032	2.21854	1.08555	0.039074	Down regulated
A_22_P00017620			1.56165	0.817312	2.64239	0.717531	0.0390299	Up regulated
A_21_P0010459			3.35701	0.787892	4.60966	1.04908	0.0388567	Up regulated
A_33_P3287610			7.17998	1.39874	8.99582	1.14616	0.0387868	Up regulated
A_22_P00007407			2.97429	0.614286	1.70455	1.22651	0.0385899	Down regulated
A_19_P00802201			8.43728	0.938223	9.56579	0.552912	0.0383156	Up regulated
A_33_P3244312			3.6997	1.53024	5.38851	0.353312	0.0383156	Up regulated
A_22_P00010755			1.62276	0.71011	2.77788	0.969354	0.0382277	Up regulated
A_22_P00008041			2.54633	0.884134	1.46926	0.549771	0.0382277	Down regulated
A_22_P00004115			2.30757	0.903615	1.24652	0.449722	0.0381999	Down regulated
A_24_P15877			5.64307	0.710607	4.5381	0.88823	0.0381999	Down regulated
A_22_P00011308			2.60703	1.18782	3.98482	0.517939	0.0378906	Up regulated
A_22_P00013899			1.52695	0.666856	2.7344	1.07947	0.0378906	Up regulated
A_21_P0002828			4.82256	1.02459	3.64619	0.400613	0.0378385	Down regulated
A_22_P00002593			2.48714	0.859828	1.48409	0.380853	0.037526	Down regulated
A_22_P00001430			10.1662	0.913713	8.91657	0.824536	0.0372407	Down regulated
A_24_P173566			10.773	0.935593	11.839	0.280706	0.0368153	Up regulated
A_33_P3301932			1.55083	0.521687	2.5843	0.946811	0.0366845	Up regulated
A_19_P00322890			3.51865	1.04356	2.13206	0.838712	0.0364172	Down regulated
A_33_P3272673			3.19548	1.20616	1.76318	0.559048	0.0364172	Down regulated
A_33_P3353796			2.64811	1.01326	1.41219	0.557756	0.036297	Down regulated
A_33_P3714341			12.0316	1.06518	13.2932	0.474862	0.0362714	Up regulated
A_33_P3397127			3.8071	1.26076	5.40027	0.82931	0.0362567	Up regulated
A_21_P0002863			1.29232	0.510887	2.70451	1.42095	0.0362139	Up regulated
A_21_P0007913			6.294	0.996342	4.62855	1.36565	0.0362139	Down regulated
A_33_P3314073			2.85045	0.720119	1.66798	0.952085	0.0360485	Down regulated
A_33_P3370015			4.34606	0.874953	5.38793	0.392968	0.0360043	Up regulated
A_33_P3297452			2.80568	0.820126	1.77541	0.517349	0.0360043	Down regulated
A_21_P0010734			2.53867	1.02131	1.39217	0.0665558	0.0359244	Down regulated
A_22_P00002642			3.55269	1.07886	4.91777	0.684631	0.0357716	Up regulated
A_33_P3387320			2.64745	1.1846	1.31625	0.0451701	0.0357716	Down regulated
A_22_P00018944			3.05591	1.29219	4.65828	0.733359	0.0357143	Up regulated
A_33_P3288969			6.11024	0.757993	4.53087	1.43318	0.0349976	Down regulated
A_24_P24371			9.84907	1.67293	11.9538	0.977215	0.0346873	Up regulated
A_22_P00009777			3.76786	0.952858	4.92967	0.436712	0.0342902	Up regulated
A_33_P3230444			2.72903	1.13542	4.32832	1.0002	0.0341801	Up regulated
A_22_P00010638			3.42778	0.420346	2.18045	1.22815	0.0339258	Down regulated
A_21_P0001154			2.48091	1.03715	1.26231	0.258522	0.0336011	Down regulated
A_21_P0005951			3.89324	1.22027	5.65466	1.11617	0.0332219	Up regulated
A_24_P281395			8.64862	1.55434	6.83063	0.280819	0.0332219	Down regulated
A_22_P00005031			3.43599	1.22188	4.90489	0.411995	0.0331134	Up regulated
A_33_P3298955			1.5538	0.422032	3.07367	1.51691	0.0329673	Up regulated
A_22_P00023379			1.2138	0.0500634	2.23135	1.06976	0.032855	Up regulated
A_33_P3223631			7.63037	0.865175	8.84614	0.707899	0.0325111	Up regulated
A_33_P3418846			1.6152	0.654895	3.03777	1.25658	0.0325046	Up regulated
A_22_P00006034			3.7702	1.19111	5.19286	0.291374	0.032397	Up regulated
A_21_P0011964			2.71271	0.823176	1.58367	0.611729	0.0322913	Down regulated
A_22_P00021674			4.20043	1.02769	5.94386	1.31287	0.0322579	Up regulated
A_21_P0012160			4.49444	0.986646	2.97004	1.02678	0.0319986	Down regulated
A_33_P3240249			1.40682	0.0913039	3.05459	1.70879	0.031922	Up regulated
A_33_P3424591			12.419	1.6006	14.4849	0.875076	0.031922	Up regulated
A_33_P3423320			3.24059	0.889019	1.96543	0.748311	0.0318339	Down regulated
A_22_P00002533			3.78897	1.18022	2.30957	0.498666	0.0316163	Down regulated
A_33_P3224185			3.04794	1.09527	1.64967	0.535978	0.0315746	Down regulated
A_22_P00004960			5.91253	0.867175	7.04798	0.487442	0.0312255	Up regulated
A_23_P104865			2.87085	0.451793	1.78278	0.971925	0.0312255	Down regulated
A_22_P00025899			2.31921	0.709315	3.36802	0.631321	0.0309484	Up regulated
A_33_P3513023			5.31122	1.30988	7.00564	0.654935	0.0308262	Up regulated
A_22_P00009500			2.98224	0.828998	1.68701	0.850622	0.0308262	Down regulated
A_22_P00008847			4.27984	0.311636	3.06717	1.17854	0.0307755	Down regulated
A_22_P00010059			3.10968	1.14389	1.7045	0.297537	0.0305619	Down regulated
A_33_P3412438			6.51974	0.806467	7.69984	0.678695	0.0302779	Up regulated
A_24_P409402			6.99046	0.859784	8.03473	0.0976975	0.0301095	Up regulated
A_33_P3336822			11.7426	1.1137	13.16	0.444631	0.0300968	Up regulated
A_33_P3213317			2.15842	0.767318	3.25465	0.588979	0.0300641	Up regulated
A_33_P3303250			1.23666	0.119455	2.51804	1.28285	0.0298096	Up regulated
A_22_P00020251			2.07623	0.808251	1.06793	0.232324	0.0298096	Down regulated
A_32_P874898			2.894	0.381929	4.03429	1.04587	0.0296093	Up regulated
A_33_P3311971			3.19635	0.740532	4.54531	1.00664	0.0296093	Up regulated
A_33_P3310754			2.88344	1.17553	1.35837	0.525507	0.0296093	Down regulated
A_21_P0009385			2.07936	0.686809	3.6697	1.35685	0.0295686	Up regulated
A_33_P3227010			2.95142	1.06195	4.27393	0.258266	0.0294573	Up regulated
A_33_P3299329			3.31129	0.580847	4.49735	0.951726	0.0294423	Up regulated
A_21_P0014066			4.29316	1.37952	2.46696	0.700646	0.0294423	Down regulated
A_22_P00000578			3.41666	0.974866	2.03392	0.703539	0.0294423	Down regulated
A_22_P00000241			3.86187	1.01389	5.30337	0.727426	0.0292292	Up regulated
A_33_P3240182			8.1927	0.721967	9.42459	0.851895	0.0292292	Up regulated
A_22_P00017253			2.75332	0.950539	1.5282	0.35496	0.0290491	Down regulated
A_33_P3228591			2.96794	0.710239	1.93744	0.538274	0.028983	Down regulated
A_33_P3250971			2.25633	0.722376	3.40828	0.719041	0.0287557	Up regulated
A_21_P0005305			1.3461	0.551467	2.45225	0.860421	0.0286976	Up regulated
A_22_P00012269			4.30634	1.18972	2.6686	0.698359	0.0285923	Down regulated
A_19_P00316110			6.79169	0.592893	5.73218	0.7433	0.0280218	Down regulated
A_21_P0012281			5.01532	0.704269	4.01265	0.463043	0.0277373	Down regulated
A_21_P0008407			1.46135	0.25823	2.71842	1.18367	0.027688	Up regulated
A_21_P0001821			3.69574	1.20448	1.9683	0.813209	0.027688	Down regulated
A_33_P3382359			3.43232	0.586721	2.22116	0.93747	0.027688	Down regulated
A_33_P3424489			10.4667	1.10807	12.0328	0.680258	0.0272707	Up regulated
A_22_P00011228			1.73974	0.392392	3.34842	1.48206	0.0272439	Up regulated
A_21_P0014590			4.93855	0.861598	3.73888	0.480306	0.0270564	Down regulated
A_33_P3255677			4.76162	0.663406	5.80498	0.596001	0.0270312	Up regulated
A_33_P3351920			3.69867	0.675048	2.25565	1.11844	0.0268842	Down regulated
A_33_P3321120			2.81965	0.398664	1.6797	0.983666	0.0268446	Down regulated
A_33_P3263319			11.9966	1.60889	14.2276	0.849486	0.0266612	Up regulated
A_19_P00808923			11.0706	0.78534	12.0847	0.14906	0.0265605	Up regulated
A_22_P00007882			3.04996	0.929048	1.63623	0.736795	0.0264945	Down regulated
A_23_P21800			13.1755	1.14025	14.6836	0.372492	0.0264537	Up regulated
A_33_P3301075			11.1749	0.798902	12.4845	0.777952	0.0260621	Up regulated
A_33_P3247639			6.34726	0.983532	7.87334	0.81567	0.0260067	Up regulated
A_22_P00024772			2.45618	1.02658	3.8739	0.486714	0.0258017	Up regulated
A_23_P218126			11.4477	1.25185	13.2862	0.838373	0.0257861	Up regulated
A_24_P101642			7.46718	0.583908	8.6041	0.810083	0.0257861	Up regulated
A_21_P0014546			8.07313	0.932054	9.4843	0.684898	0.0255361	Up regulated
A_22_P00010236			3.56501	0.86876	4.90789	0.686633	0.0255361	Up regulated
A_19_P00315841			2.51824	0.900338	1.30984	0.288576	0.0255361	Down regulated
A_23_P361654			10.1533	1.15445	11.8045	0.641231	0.0254474	Up regulated
A_21_P0004062			3.09023	1.03731	1.59633	0.593655	0.0253729	Down regulated
A_21_P0008949			3.08503	1.39442	5.13826	0.879361	0.0252085	Up regulated
A_22_P00025357			2.74646	1.27265	1.08081	0.0486678	0.0252085	Down regulated
A_33_P3340114			2.01631	0.784958	0.988352	0.0234074	0.0252085	Down regulated
A_33_P3329557			2.99545	0.786852	1.82248	0.520833	0.0251615	Down regulated
A_33_P3387090			4.59504	0.729399	3.40105	0.664774	0.0250764	Down regulated
A_22_P00016526			3.64547	0.684281	2.29137	0.942599	0.0249717	Down regulated
A_19_P00321190			1.21899	0.102198	2.5143	1.19278	0.0246465	Up regulated
A_33_P3369991			2.26805	0.705665	3.35919	0.523013	0.0246465	Up regulated
A_22_P00019430			1.15672	0.127215	2.41869	1.15367	0.0243823	Up regulated
A_33_P3223535			3.17961	0.810737	1.85226	0.717817	0.0243823	Down regulated
A_21_P0006684			1.78588	0.786593	2.9071	0.372875	0.0243243	Up regulated
A_33_P3330877			3.11135	0.59126	2.08984	0.590966	0.0239746	Down regulated
A_22_P00002151			4.01228	0.809187	2.52589	0.924827	0.0237555	Down regulated
A_21_P0010932			3.30171	0.719168	2.13497	0.586386	0.0235415	Down regulated
A_21_P0005209			3.13817	0.634152	1.77163	0.963658	0.0234765	Down regulated
A_33_P3288605			5.07774	0.65545	3.42442	1.25746	0.0233713	Down regulated
A_22_P00000410			2.93008	0.323632	1.84496	0.893274	0.023168	Down regulated
A_22_P00013780			2.05715	0.735345	1.03637	0.161503	0.0228784	Down regulated
A_22_P00017364			2.09273	0.802998	3.25206	0.318064	0.0227693	Up regulated
A_21_P0011347			8.89614	0.779309	10.0674	0.411962	0.0223749	Up regulated
A_24_P144346			12.9374	0.566121	14.1003	0.76387	0.0223654	Up regulated
A_24_P15388			11.0036	0.801017	12.3885	0.728052	0.0221714	Up regulated
A_24_P110242			12.2582	0.703897	13.5858	0.785465	0.0218809	Up regulated
A_33_P3289248			9.62845	0.949407	11.0808	0.514828	0.0215796	Up regulated
A_21_P0001037			4.37856	0.774167	3.04616	0.653635	0.0206811	Down regulated
A_33_P3385351			3.07215	0.696608	1.80622	0.682545	0.0205742	Down regulated
A_22_P00016276			4.31141	0.890624	5.88967	0.793368	0.0200982	Up regulated
A_22_P00012223			1.26226	0.080542	2.64418	1.17534	0.0200788	Up regulated
A_33_P3247890			2.43226	0.688645	3.54853	0.436132	0.0200788	Up regulated
A_22_P00005125			4.86636	1.14357	2.37205	1.59905	0.0200788	Down regulated
A_21_P0013131			3.59564	1.0292	5.18187	0.471862	0.0200137	Up regulated
A_33_P3405198			1.51236	0.411863	2.65157	0.824659	0.0200137	Up regulated
A_23_P343900			6.45561	0.624261	8.06146	1.12018	0.0197933	Up regulated
A_33_P3356413			4.17002	0.887841	2.52148	0.863655	0.0196743	Down regulated
A_33_P3331178			7.25508	0.779594	8.62624	0.642208	0.0194988	Up regulated
A_22_P00005952			4.86186	0.665463	3.84876	0.239157	0.0194525	Down regulated
A_33_P3285097			3.92443	0.642784	2.44164	0.960499	0.0194232	Down regulated
A_24_P204727			10.728	0.589627	12.029	0.811371	0.0192897	Up regulated
A_33_P3345881			1.85495	0.698931	3.41675	0.97828	0.0191417	Up regulated
A_22_P00013880			3.0812	0.579348	1.84729	0.738431	0.0188968	Down regulated
A_21_P0010514			8.84622	0.518565	7.6385	0.772883	0.0187726	Down regulated
A_19_P00318679			5.54132	0.650191	4.13682	0.843712	0.0187171	Down regulated
A_22_P00006238			2.36131	0.518137	1.25946	0.653389	0.0187171	Down regulated
A_22_P00003224			3.89086	1.00897	2.29314	0.459693	0.0187108	Down regulated
A_22_P00015510			11.7647	0.605515	12.7947	0.40788	0.0185889	Up regulated
A_22_P00017244			6.94	0.7836	5.75228	0.168677	0.0184906	Down regulated
A_21_P0004694			1.39537	0.36819	2.60984	0.888048	0.0184782	Up regulated
A_24_P608268			6.5903	0.826679	8.2302	0.880684	0.0184599	Up regulated
A_24_P813550			9.56009	0.679727	10.6756	0.374227	0.0184599	Up regulated
A_33_P3331220			8.19965	0.722349	9.64837	0.791092	0.0184599	Up regulated
A_33_P3331228			8.89739	0.806861	10.3873	0.713874	0.0184599	Up regulated
A_22_P00011746			2.52187	0.776686	4.43054	1.22051	0.0180422	Up regulated
A_33_P3235876			9.79255	0.791416	11.3411	0.789627	0.017743	Up regulated
A_22_P00025921			1.50783	0.390571	2.77294	0.894007	0.0174615	Up regulated
A_22_P00014892			8.00209	0.56687	9.16973	0.612115	0.0169715	Up regulated
A_33_P3346508			7.30239	0.517271	6.1766	0.62842	0.0169715	Down regulated
A_33_P3321689			5.5416	0.675741	6.7571	0.478831	0.016606	Up regulated
A_19_P00321319			3.65051	0.573395	2.2177	0.88255	0.016606	Down regulated
A_21_P0012649			4.33664	0.595058	5.3441	0.300215	0.0163061	Up regulated
A_22_P00009283			4.92616	0.519226	3.37414	1.02901	0.0160608	Down regulated
A_33_P3314710			2.54026	0.856722	1.18971	0.0201873	0.0159339	Down regulated
A_22_P00025807			3.11142	0.966984	1.49255	0.417529	0.0158687	Down regulated
A_21_P0014533			3.12202	0.664799	4.22272	0.254967	0.0158586	Up regulated
A_22_P00001807			2.73902	0.71892	3.98029	0.385132	0.0158577	Up regulated
A_33_P3347012			2.73334	0.856672	1.20375	0.534251	0.0157223	Down regulated
A_22_P00000423			4.8333	0.80999	3.37317	0.517913	0.015498	Down regulated
A_22_P00009258			4.46783	0.599299	3.05997	0.786357	0.0153879	Down regulated
A_33_P3231814			6.18449	0.531662	5.0583	0.558843	0.015261	Down regulated
A_21_P0014468			3.40786	0.704257	4.62556	0.338227	0.0152361	Up regulated
A_33_P3231645			2.31792	0.656156	1.24767	0.093941	0.0150091	Down regulated
A_22_P00012710			5.01011	0.824887	3.61821	0.260452	0.0147373	Down regulated
A_22_P00023815			4.42268	0.479513	3.19028	0.713297	0.0147373	Down regulated
A_22_P00020052			1.48258	0.12934	2.7805	0.953327	0.0143997	Up regulated
A_21_P0009211			4.26191	0.619624	2.40932	1.15148	0.0143997	Down regulated
A_33_P3226228			4.63186	0.287507	3.53963	0.731086	0.0143263	Down regulated
A_21_P0009723			2.43098	0.507826	1.34322	0.507358	0.0139365	Down regulated
A_24_P375227			4.6814	0.633736	3.6116	0.144775	0.0139365	Down regulated
A_33_P3242355			7.40744	0.604397	8.61767	0.481538	0.0132981	Up regulated
A_22_P00015771			3.78594	1.05026	1.76634	0.711746	0.013167	Down regulated
A_21_P0002457			1.50117	0.419988	2.76174	0.756863	0.0130443	Up regulated
A_24_P315862			10.049	0.506364	11.0513	0.380872	0.0130443	Up regulated
A_33_P3222539			2.20536	0.543751	3.3487	0.494184	0.0130443	Up regulated
A_33_P3227703			5.81622	0.508605	6.82022	0.367771	0.0130443	Up regulated
A_33_P3340981			1.96252	0.518616	3.20212	0.632448	0.0130443	Up regulated
A_21_P0012249			8.069	0.461809	6.75035	0.771603	0.0130443	Down regulated
A_33_P3402010			4.01032	0.83283	2.00325	1.03534	0.0130443	Down regulated
A_22_P00003666			14.9897	0.942508	16.6397	0.247349	0.0128984	Up regulated
A_33_P3304893			2.87055	0.586248	3.93901	0.269147	0.0128984	Up regulated
A_33_P3331233			4.18467	0.75495	5.84589	0.749663	0.0128984	Up regulated
A_22_P00023877			2.49756	0.563038	1.43133	0.321062	0.0128331	Down regulated
A_33_P3242251			2.0964	0.56616	3.41133	0.629432	0.012765	Up regulated
A_22_P00001598			10.8758	0.732089	9.59181	0.17977	0.012765	Down regulated
A_22_P00004801			3.5258	0.695405	4.74817	0.12251	0.0123109	Up regulated
A_22_P00009761			1.40017	0.158449	2.98436	1.09016	0.0121185	Up regulated
A_22_P00002412			3.91883	0.559499	2.39036	0.811609	0.0118945	Down regulated
A_22_P00013161			1.23824	0.0954057	2.37024	0.775215	0.0118198	Up regulated
A_24_P15640			8.84055	0.555541	9.97309	0.389421	0.0118133	Up regulated
A_22_P00013662			2.0616	0.714628	3.41767	0.335554	0.0117688	Up regulated
A_21_P0013145			8.95646	0.773592	10.6273	0.657765	0.0117334	Up regulated
A_22_P00006888			4.14344	0.542361	5.25558	0.383305	0.0117147	Up regulated
A_33_P3395314			5.01301	0.472138	6.06636	0.439268	0.0117147	Up regulated
A_22_P00004035			2.84352	0.789491	1.42966	0.0833945	0.0115308	Down regulated
A_24_P84008			7.64076	0.532607	6.55258	0.361002	0.0114228	Down regulated
A_33_P3245665			4.42857	0.530943	5.55225	0.394488	0.0109508	Up regulated
A_22_P00015420			2.83201	0.770552	1.37614	0.28223	0.0109508	Down regulated
A_24_P461497			4.38268	0.383553	5.59964	0.675198	0.0109416	Up regulated
A_33_P3238626			3.53264	0.647626	2.28536	0.260834	0.0106151	Down regulated
A_22_P00018152			2.95944	0.757567	1.45291	0.383697	0.01043	Down regulated
A_33_P3408877			6.99775	0.556477	8.15602	0.323395	0.00964326	Up regulated
A_33_P3397066			3.30342	0.738617	1.85005	0.273333	0.0095984	Down regulated
A_21_P0005204			2.77382	0.446923	3.91201	0.49094	0.00942125	Up regulated
A_22_P00008647			5.0261	0.409972	6.05009	0.430041	0.00942125	Up regulated
A_22_P00006556			6.43505	0.8125	4.77837	0.387728	0.00942125	Down regulated
A_24_P366535			8.23215	0.550593	7.15405	0.165079	0.00942125	Down regulated
A_24_P409824			5.95426	0.548271	7.0888	0.269805	0.00926898	Up regulated
A_22_P00009895			2.13253	0.552881	3.32627	0.343849	0.0092674	Up regulated
A_33_P3263157			5.90066	0.647754	7.23691	0.306143	0.0092674	Up regulated
A_33_P3349840			7.33315	0.635197	8.63068	0.250855	0.00901686	Up regulated
A_33_P3303394			12.8962	0.598741	14.3768	0.523508	0.00790028	Up regulated
A_33_P3343305			6.14527	0.477667	4.96488	0.416741	0.00790028	Down regulated
A_22_P00023677			8.62772	1.30487	5.29089	1.21099	0.00742279	Down regulated
A_33_P3331150			8.71514	0.466664	10.5719	0.954517	0.00733753	Up regulated
A_33_P3701139			7.64872	0.699153	6.1588	0.236834	0.00727947	Down regulated
A_33_P3337742			7.87093	0.838648	9.72271	0.392856	0.00721163	Up regulated
A_33_P3260654			11.8093	0.407505	13.0303	0.51124	0.006886	Up regulated
A_22_P00004415			5.95255	0.578604	3.40097	1.30196	0.00667527	Down regulated
A_22_P00015629			8.10509	1.2801	3.7204	2.00809	0.00667527	Down regulated
A_33_P3321369			7.02684	0.918695	9.21276	0.581556	0.00664095	Up regulated
A_21_P0010557			6.39902	0.932248	8.58491	0.5459	0.00663989	Up regulated
A_22_P00022471			8.48092	0.425939	9.58586	0.344723	0.00612457	Up regulated
A_21_P0002073			8.34313	0.411456	9.42237	0.336241	0.00608996	Up regulated
A_22_P00018427			6.70117	0.508125	7.89409	0.222568	0.00583297	Up regulated
A_21_P0009166			4.92942	0.585314	6.56911	0.514458	0.00521253	Up regulated
A_33_P3261074			2.31168	0.401551	1.20735	0.327795	0.00521253	Down regulated
A_21_P0005309			9.1505	0.598192	10.7126	0.361673	0.00483665	Up regulated
A_21_P0004684			3.7759	0.434185	5.15846	0.452857	0.00418268	Up regulated
A_33_P3414017			7.90941	0.437442	9.11648	0.268821	0.00398355	Up regulated
A_22_P00022246			9.87663	0.41725	11.0647	0.259796	0.0036612	Up regulated
A_22_P00004633			5.42891	0.251625	6.63592	0.489603	0.00365365	Up regulated
A_22_P00001056			4.10497	0.753883	2.0216	0.293831	0.00308861	Down regulated
A_22_P00024641			6.21639	0.448844	7.50759	0.195194	0.00270779	Up regulated
A_22_P00007142			9.37523	0.734606	11.3987	0.13934	0.0026906	Up regulated
A_21_P0000520			7.22429	0.331326	8.33117	0.272228	0.00247416	Up regulated
A_22_P00012644			7.88282	0.346074	9.71437	0.644309	0.00210574	Up regulated
A_22_P00017353			11.7914	0.287303	13.1396	0.436591	0.00204865	Up regulated
A_22_P00008071			13.9106	0.353018	15.154	0.187822	0.00121608	Up regulated
A_21_P0011406			10.8102	0.322527	12.2261	0.321078	0.00089037	Up regulated
A_33_P3230037			12.4715	0.408484	14.4307	0.456476	0.000703434	Up regulated
A_33_P3264444			7.91645	0.265909	9.00907	0.154919	0.00052879	Up regulated
A_21_P0014791			6.63303	0.41705	8.95598	0.21753	0.000131019	Up regulated
