# Supplementary material for: Gene Expression Profiling in Coeliac Disease Confirmed the Key Role of the Immune System and Revealed a Molecular Overlap with Non-Celiac Gluten Sensitivity
Source: Int J Mol Sci. 2023 Apr 24;24(9):7769. doi: 10.3390/ijms24097769 (PMC10178871; doi:10.3390/ijms24097769)
Supplement: Supplementary file 1 [file ijms-24-07769-s001.zip › Supplementary Table S2.xlsx]

## Sheet: Enriched biological processes 
	Enriched biological processes
#term ID	term description	observed gene count	background gene count	strength	false discovery rate	matching proteins in the network
GO:0000278	Mitotic cell cycle	74	695	0.38	3.6e-07	MYBL2,ERF,HGF,HAUS3,DLGAP5,CCNB1,KIF23,KIF11,NDC80,MCM4,PKMYT1,GINS1,E2F3,KIF18A,MCM2,CENPE,DBF4,CCNA2,CDCA5,CDK16,CDKN2B,ANK3,SPC25,TRIM36,SMC2,BUB1B,FANCD2,CCNB2,MELK,PLK1,TPX2,BIRC5,BUB1,AURKC,PRKCB,TAOK2,SKA3,TUBB3,E2F7,KIF15,GSG2,ENSA,BLM,UBE2C,SGOL2,WDHD1,IQGAP3,CENPF,KIF14,CENPW,TTK,CEP55,ORC1,CDC20,FOXO4,KIF4A,PIM2,BRCA2,BRSK2,DNM2,CIT,PRC1,KIF20A,CDK1,WDR62,SUN2,CDC7,CDC45,TOP2A,GTSE1,PC…
GO:1903047	Mitotic cell cycle process	66	616	0.39	1.77e-06	MYBL2,HAUS3,DLGAP5,CCNB1,KIF23,KIF11,NDC80,MCM4,PKMYT1,GINS1,E2F3,KIF18A,MCM2,CENPE,DBF4,CCNA2,CDCA5,CDK16,CDKN2B,ANK3,SPC25,TRIM36,SMC2,BUB1B,FANCD2,CCNB2,MELK,PLK1,TPX2,BIRC5,BUB1,AURKC,PRKCB,TAOK2,E2F7,GSG2,ENSA,BLM,UBE2C,SGOL2,IQGAP3,CENPF,KIF14,TTK,CEP55,ORC1,CDC20,FOXO4,KIF4A,PIM2,BRCA2,BRSK2,DNM2,CIT,PRC1,KIF20A,CDK1,WDR62,SUN2,CDC7,CDC45,TOP2A,GTSE1,PCBP4,HMGA2,NUSAP1
GO:0022402	Cell cycle process	89	976	0.32	1.94e-06	VASH1,MYBL2,IFNG,MAPRE3,HAUS3,DLGAP5,SGSM3,CCNB1,BRIP1,KIF23,KIF11,NDC80,MCM4,PRR11,PKMYT1,PKD1,GINS1,E2F3,KIF18A,MCM2,MSH3,CENPE,DBF4,CCNA2,CDCA5,CDK16,CDKN2B,ANK3,SPC25,TRIM36,SMC2,BUB1B,FANCD2,CCNB2,MELK,PLK1,TPX2,BIRC5,BUB1,AURKC,PRKCB,TAOK2,E2F7,GSG2,CASC5,HORMAD2,ENSA,BLM,UBE2C,SGOL2,IQGAP3,TGFB2,CENPF,KIF14,ASPM,CENPW,TTK,CEP55,ORC1,RAD54L,CDC20,FOXO4,KIF4A,PIM2,BRCA2,BRSK2,DNM2,CIT,PTTG1,…
GO:0048285	Organelle fission	43	318	0.49	2.78e-06	MYBL2,DLGAP5,CCNB1,BRIP1,KIF23,KIF11,NDC80,KIF18A,MSH3,CENPE,CDCA5,SMC2,BUB1B,FANCD2,CCNB2,ACOX1,PLK1,TPX2,BIRC5,BUB1,AURKC,PRKCB,SEC16B,GSG2,HORMAD2,UBE2C,SGOL2,KIF14,ASPM,TTK,RAD54L,CDC20,KIF4A,BRCA2,DNM2,PTTG1,PRC1,CDK1,TOP2A,TEX40,NUSAP1,TUBB8,REC8
GO:0000280	Nuclear division	40	291	0.49	5.69e-06	MYBL2,DLGAP5,CCNB1,BRIP1,KIF23,KIF11,NDC80,KIF18A,MSH3,CENPE,CDCA5,SMC2,BUB1B,FANCD2,CCNB2,PLK1,TPX2,BIRC5,BUB1,AURKC,PRKCB,GSG2,HORMAD2,UBE2C,SGOL2,KIF14,ASPM,TTK,RAD54L,CDC20,KIF4A,BRCA2,PTTG1,PRC1,CDK1,TOP2A,TEX40,NUSAP1,TUBB8,REC8
GO:0009605	Response to external stimulus	159	2310	0.19	4.47e-05	CD4,BPIFB2,SCT,CEBPE,HGF,SERPINE1,OAS3,IFNG,TFPI,AZU1,APOA1,EGR2,MKKS,MMP24,GNGT1,RAF1,APOE,CHI3L1,NTS,CCNB1,ANO3,DOCK2,BRIP1,IL36A,SEMA7A,PKD1,NLRC5,CNN2,LY9,IL37,SELP,HDAC4,ICAM1,KNG1,ACAT1,GABARAPL1,REG3G,CDKN2B,BATF,PPARG,NCF1,TRIM62,PTGER1,IL17RC,AQP3,C2,IL16,PCSK9,CXCL10,CXCL11,DDIT4,LPL,PER1,BACE1,PCK1,TUBB3,BANK1,CD6,PKD2L1,RNF166,IFNLR1,PDE6G,ADSSL1,PRKD1,CMTM7,LRAT,HLA-DQA1,DFNA5,KLHL6,…
GO:0007049	Cell cycle	103	1313	0.25	5.99e-05	VASH1,MYBL2,ERF,HGF,IFNG,MAPRE3,HAUS3,DLGAP5,SGSM3,CCNB1,BRIP1,KIF23,KIF11,NDC80,MCM4,PRR11,PKMYT1,PKD1,GINS1,E2F3,KIF18A,MCM2,MSH3,CENPE,DBF4,CCNA2,CDCA5,CDK16,CDKN2B,ANK3,SPC25,TRIM36,SMC2,BUB1B,FANCD2,CCNB2,MELK,PLK1,TPX2,BIRC5,BUB1,AURKC,PRKCB,TAOK2,CHAF1B,SKA3,TUBB3,CDK20,E2F7,KIF15,GSG2,CASC5,HORMAD2,ENSA,BLM,UBE2C,SGOL2,WDHD1,IQGAP3,TGFB2,CENPF,KIF14,ASPM,CENPW,MKI67,TTK,CEP55,ORC1,RAD54L,…
GO:0002250	Adaptive immune response	39	317	0.45	8.57e-05	CD4,LAG3,CD79A,CRTAM,IFNG,LY9,MCOLN1,ICAM1,LAMP3,BATF,TNFRSF13C,C2,CD3D,CTLA4,PRKCB,FCAMR,CD6,RORC,HLA-DQA1,KLHL6,C17orf99,SUSD4,TAP1,SLAMF7,SLAMF6,FCGR1B,MCOLN2,SH2D1A,TAP2,HLA-DQA2,GATA3,CD274,IL6,CD8A,HLA-DOB,JAK3,PRF1,C4B,CD3G
GO:0050896	Response to stimulus	433	8046	0.09	9.65e-05	CD4,UTS2,VASH1,BPIFB2,SCT,TRIP6,LAG3,APOH,CEBPE,FGF22,MADCAM1,OSM,MYBL2,BIRC7,PLLP,SLC6A2,CYP4F2,CD79A,HGF,TFPI2,TSPAN12,CHN2,SERPINE1,P2RX5,CLNK,CRTAM,DGAT2,OAS3,IFNG,TFPI,NRBP1,IGFBP5,AZU1,PROC,ANGPTL1,SELL,APOA1,KALRN,EGR2,UNC5CL,CPNE5,MYH2,MKKS,S1PR4,MMP24,DLGAP5,GNGT1,SGSM3,HCN2,RAF1,APOE,NUMBL,FUS,IGHMBP2,MTL5,CHI3L1,NTS,CCNB1,ANO3,DOCK2,MIP,TMEM231,BRIP1,IL36A,POU5F1,CYP2C9,NDST1,SEMA7A,MC…
GO:0007059	Chromosome segregation	34	268	0.46	0.00023	DLGAP5,CCNB1,BRIP1,KIF23,NDC80,KIF18A,CENPE,CDCA5,SPC25,SMC2,BUB1B,FANCD2,PLK1,BIRC5,BUB1,AURKC,SKA3,GSG2,CASC5,HORMAD2,SGOL2,CENPF,KIF14,CENPW,TTK,CDC20,KIF4A,PTTG1,PRC1,TOP2A,HJURP,NUSAP1,FAM83D,REC8
GO:0051301	Cell division	50	493	0.36	0.00023	MAPRE3,HAUS3,NUMBL,CCNB1,BRIP1,KIF23,KIF11,NDC80,CENPE,CCNA2,CDCA5,ANK3,SPC25,TRIM36,SMC2,BUB1B,CCNB2,PLK1,TPX2,BIRC5,BUB1,AURKC,SKA3,CDK20,CASC5,ENSA,UBE2C,SGOL2,TGFB2,CENPF,KIF14,ASPM,CENPW,CEP55,CDC20,KIF4A,NEDD9,BRSK2,CIT,PTTG1,PRC1,KIF20A,CDK1,CDC7,TOP2A,WWTR1,HMGA2,NUSAP1,SEPT2,FAM83D
GO:0140014	Mitotic nuclear division	25	156	0.56	0.00023	MYBL2,DLGAP5,CCNB1,KIF23,KIF11,NDC80,KIF18A,CENPE,CDCA5,SMC2,CCNB2,PLK1,TPX2,BIRC5,AURKC,PRKCB,GSG2,UBE2C,SGOL2,KIF14,CDC20,KIF4A,PRC1,CDK1,NUSAP1
GO:0098813	Nuclear chromosome segregation	29	209	0.5	0.00029	DLGAP5,CCNB1,BRIP1,KIF23,NDC80,KIF18A,CENPE,CDCA5,SMC2,BUB1B,FANCD2,PLK1,BUB1,AURKC,GSG2,CASC5,HORMAD2,SGOL2,CENPF,KIF14,TTK,CDC20,KIF4A,PTTG1,PRC1,TOP2A,NUSAP1,FAM83D,REC8
GO:0000819	Sister chromatid segregation	22	133	0.58	0.00051	DLGAP5,CCNB1,KIF23,NDC80,KIF18A,CENPE,CDCA5,SMC2,BUB1B,PLK1,BUB1,AURKC,GSG2,HORMAD2,SGOL2,KIF14,CDC20,KIF4A,PRC1,TOP2A,NUSAP1,REC8
GO:0002376	Immune system process	161	2481	0.17	0.00051	CD4,BPIFB2,LAG3,CEBPE,MADCAM1,OSM,CD79A,CRTAM,OAS3,IFNG,AZU1,SELL,MYH2,S1PR4,RAF1,CHI3L1,NTS,DOCK2,IL36A,KIF23,KIF11,SEMA7A,NLRC5,CNN2,KIF18A,LY9,IL37,SELP,PKP1,MCOLN1,POLQ,RAB17,HDAC4,PSMD3,ICAM1,KNG1,MSH3,CENPE,LAMP3,LMBR1L,CBFA2T3,REG3G,GPR174,CDKN2B,BATF,PPARG,CCNB2,NCF1,TNFRSF13C,TRIM62,PDPN,IL17RC,MELK,C2,EPB42,CD3D,IL16,CTLA4,PRKCB,SIRPG,CXCL10,CXCL11,DDIT4,ELMO1,FCAMR,BANK1,CD6,KIF15,RNF1…
GO:0006955	Immune response	113	1588	0.21	0.00051	CD4,BPIFB2,LAG3,MADCAM1,OSM,CD79A,CRTAM,OAS3,IFNG,AZU1,SELL,S1PR4,CHI3L1,NTS,DOCK2,IL36A,SEMA7A,NLRC5,CNN2,LY9,IL37,PKP1,MCOLN1,RAB17,PSMD3,ICAM1,KNG1,LAMP3,REG3G,BATF,PPARG,NCF1,TNFRSF13C,TRIM62,C2,CD3D,IL16,CTLA4,PRKCB,CXCL10,CXCL11,FCAMR,CD6,RNF166,RORC,IFNLR1,FFAR3,NRROS,PRKD1,MMP25,HLA-DQA1,KLHL6,OAS2,IFI6,C17orf99,SUSD4,ANXA2,TAP1,C5AR1,ITGAL,DOK3,TLR9,STAT1,XAF1,CXCL9,CHIT1,VNN1,FCGR3A,SLA…
GO:0007051	Spindle organization	23	145	0.56	0.00051	MYBL2,MAPRE3,HAUS3,CCNB1,KIF23,KIF11,NDC80,CENPE,SPC25,TRIM36,TPX2,BIRC5,AURKC,ASPM,CENPW,TTK,CDC20,KIF4A,PRC1,WDR62,SUN2,AUNIP,TUBB8
GO:0051707	Response to other organism	95	1256	0.24	0.00051	CD4,BPIFB2,CEBPE,SERPINE1,OAS3,IFNG,TFPI,AZU1,NTS,IL36A,NLRC5,LY9,IL37,SELP,ICAM1,KNG1,REG3G,BATF,PPARG,NCF1,TRIM62,PTGER1,IL17RC,C2,CXCL10,CXCL11,DDIT4,LPL,PCK1,BANK1,CD6,RNF166,IFNLR1,PRKD1,LRAT,HLA-DQA1,DFNA5,KLHL6,OAS2,IFI6,SUSD4,IKZF3,PALM3,C5AR1,TLR9,STAT1,XAF1,CXCL9,DUSP10,CHIT1,VNN1,SLAMF7,SLAMF6,AIM2,S100A14,FCGR1B,ABCC2,GBP5,GBP4,MCOLN2,SH2D1A,NCR2,HLA-DQA2,AGER,CARD17,AIF1,PIM2,UBD,GAT…
GO:0009607	Response to biotic stimulus	96	1289	0.23	0.00058	CD4,BPIFB2,CEBPE,SERPINE1,CRTAM,OAS3,IFNG,TFPI,AZU1,NTS,IL36A,NLRC5,LY9,IL37,SELP,ICAM1,KNG1,REG3G,BATF,PPARG,NCF1,TRIM62,PTGER1,IL17RC,C2,CXCL10,CXCL11,DDIT4,LPL,PCK1,BANK1,CD6,RNF166,IFNLR1,PRKD1,LRAT,HLA-DQA1,DFNA5,KLHL6,OAS2,IFI6,SUSD4,IKZF3,PALM3,C5AR1,TLR9,STAT1,XAF1,CXCL9,DUSP10,CHIT1,VNN1,SLAMF7,SLAMF6,AIM2,S100A14,FCGR1B,ABCC2,GBP5,GBP4,MCOLN2,SH2D1A,NCR2,HLA-DQA2,AGER,CARD17,AIF1,PIM2,U…
GO:0006952	Defense response	96	1296	0.23	0.00068	CD4,CEBPE,SERPINE1,OAS3,IFNG,AZU1,CHI3L1,IL36A,NDST1,SEMA7A,NLRC5,LY9,IL37,SELP,HDAC4,KLKB1,ICAM1,KNG1,IGFBP4,REG3G,BATF,PPARG,NCF1,TRIM62,PTGER1,IL17RC,C2,CXCL10,CXCL11,DDIT4,SERPINF2,CD6,RNF166,IFNLR1,FFAR3,NRROS,PRKD1,MMP25,HLA-DQA1,OAS2,IFI6,SUSD4,TAP1,C5AR1,C2CD4A,ITGAL,TLR9,SCUBE1,STAT1,XAF1,CXCL9,FAIM3,VNN1,SLAMF7,SLAMF6,AIM2,CD5L,S100A14,FCGR1B,GBP5,GBP4,MCOLN2,SH2D1A,AGTR2,NCR2,HLA-DQA2,…
GO:0051716	Cellular response to stimulus	354	6489	0.09	0.00068	CD4,UTS2,SCT,TRIP6,LAG3,CEBPE,FGF22,MADCAM1,OSM,MYBL2,BIRC7,CD79A,HGF,TFPI2,TSPAN12,CHN2,SERPINE1,P2RX5,CLNK,DGAT2,OAS3,IFNG,TFPI,NRBP1,IGFBP5,AZU1,ANGPTL1,APOA1,KALRN,EGR2,UNC5CL,CPNE5,MYH2,MKKS,S1PR4,DLGAP5,GNGT1,SGSM3,HCN2,RAF1,APOE,NUMBL,FUS,IGHMBP2,CHI3L1,NTS,CCNB1,DOCK2,TMEM231,BRIP1,IL36A,POU5F1,CYP2C9,NDST1,SEMA7A,MCM4,SMAD2,PKD1,TRAF4,NLRC5,CNN2,KIF18A,IL37,SELP,PKP1,MCOLN1,POLQ,SHC2,RAB…
GO:0006954	Inflammatory response	49	515	0.33	0.00081	IFNG,AZU1,CHI3L1,IL36A,NDST1,SEMA7A,IL37,SELP,HDAC4,KLKB1,ICAM1,KNG1,IGFBP4,REG3G,PTGER1,CXCL10,CXCL11,SERPINF2,CD6,FFAR3,NRROS,PRKD1,MMP25,C5AR1,C2CD4A,ITGAL,TLR9,SCUBE1,CXCL9,VNN1,AIM2,CD5L,GBP5,AGTR2,AGER,AIF1,GATA3,IL2RA,IL17RE,SAA1,IL6,CXCR6,CD36,C4B,TNIP3,SAA2,CCR3,ADAM8,CCL18
GO:0048583	Regulation of response to stimulus	240	4114	0.12	0.001	CACNG3,CD4,FAM168A,VASH1,SCT,TRIP6,LAG3,APOH,FGF22,MADCAM1,OSM,BIRC7,CD79A,HGF,CHN2,SERPINE1,P2RX5,CLNK,CRTAM,IFNG,TFPI,IGFBP5,AZU1,PROC,SELL,APOA1,KALRN,UNC5CL,MYH2,MKKS,SGSM3,RAF1,APOE,FUS,NUP210,CHI3L1,BRIP1,IL36A,POU5F1,SIX3,NDST1,SEMA7A,SMAD2,TRAF4,NLRC5,IL37,SELP,POLQ,SHC2,HDAC4,PSMD3,KLKB1,ICAM1,EVC,KNG1,INHBE,LMBR1L,IGFBP4,ATP6V1C2,REG3G,FGF18,CDK16,GPR174,CDKN2B,BICD1,SETD9,FANCD2,PPARG,…
GO:0010965	Regulation of mitotic sister chromatid separation	14	60	0.72	0.0011	DLGAP5,CCNB1,NDC80,CENPE,BUB1B,PLK1,BIRC5,BUB1,UBE2C,CENPF,TTK,CDC20,PTTG1,XRCC3
GO:0007052	Mitotic spindle organization	16	81	0.65	0.0014	MYBL2,CCNB1,KIF23,KIF11,NDC80,CENPE,SPC25,TPX2,BIRC5,AURKC,TTK,CDC20,KIF4A,PRC1,WDR62,SUN2
GO:0070887	Cellular response to chemical stimulus	179	2919	0.14	0.0019	CD4,CEBPE,FGF22,OSM,MYBL2,HGF,SERPINE1,DGAT2,OAS3,IFNG,TFPI,IGFBP5,AZU1,EGR2,CPNE5,MKKS,GNGT1,HCN2,RAF1,APOE,NUMBL,FUS,CHI3L1,CCNB1,BRIP1,IL36A,POU5F1,CYP2C9,NDST1,SMAD2,TRAF4,CNN2,KIF18A,IL37,MCOLN1,HDAC4,PSMD3,ICAM1,MCM2,ADH4,ABHD2,ATP6V1C2,CCNA2,FGF18,CDKN2B,ANK3,BATF,FANCD2,PPARG,NCF1,TNFRSF13C,TRIM62,RNF126,PTGER1,IL17RC,AQP3,MELK,BIRC5,LTBP3,IL16,PCSK9,LRP8,PRKCB,CXCL10,SHCBP1,CXCL11,DDIT4,…
GO:0007010	Cytoskeleton organization	84	1126	0.23	0.002	ACTL6B,MYBL2,MAPRE3,HAUS3,KRT13,RAF1,APOE,MICALCL,CCNB1,DOCK2,KIF23,KIF11,EPB41L4A,NDC80,CNN2,KIF18A,PKP1,CENPE,ANK3,BICD1,SPC25,TRIM36,CATIP,FTCD,WDR63,PLK1,EPB42,TPX2,BIRC5,AURKC,BFSP2,TAOK2,ELMO1,PDLIM2,TUBB3,MAP1S,CLIP4,SYNE3,RLTPR,PDLIM7,SPEF2,ANK2,SYNE1,ASPM,CENPW,LOR,TTK,PREX1,RSPH9,CDC20,KIF4A,ACTL8,FGD3,AIF1,DVL1,NEDD9,FAM179A,BRCA2,RUFY3,BRSK2,BCAS3,CIT,WIPF1,PRC1,KIF20A,CDK1,HOOK2,EVPL…
GO:0030071	Regulation of mitotic metaphase/anaphase transition	13	56	0.72	0.0022	DLGAP5,CCNB1,NDC80,CENPE,BUB1B,PLK1,BIRC5,BUB1,UBE2C,CENPF,TTK,CDC20,XRCC3
GO:0048518	Positive regulation of biological process	331	6112	0.09	0.0028	CACNG3,CD4,FAM168A,ACTL6B,SCT,TRIP6,CETP,LAG3,APOH,CEBPE,FGF22,MADCAM1,OSM,MYBL2,BIRC7,CYP4F2,CD79A,HGF,SERPINE1,P2RX5,HLF,CLNK,CRTAM,DGAT2,IFNG,AGXT2,MAPRE3,IGFBP5,AZU1,PROC,APOA1,KALRN,EGR2,UNC5CL,CPNE5,MYH2,MKKS,DLGAP5,SGSM3,RAF1,APOE,NUMBL,UBE2M,FUS,CHI3L1,CCNB1,DOCK2,MIP,TAF5L,IL36A,POU5F1,KIF23,SIX3,NDC80,NDST1,SEMA7A,MSR1,SMAD2,PKD1,TRAF4,NLRC5,E2F3,LY9,IL37,SELP,PKP1,SHC2,HDAC4,PSMD3,KLKB…
GO:0006950	Response to stress	205	3485	0.13	0.0035	CD4,VASH1,APOH,CEBPE,BIRC7,PLLP,SLC6A2,CYP4F2,TFPI2,SERPINE1,P2RX5,OAS3,IFNG,TFPI,AZU1,PROC,APOA1,GNGT1,RAF1,APOE,IGHMBP2,CHI3L1,CCNB1,BRIP1,IL36A,POU5F1,NDST1,SEMA7A,MCM4,SMAD2,PKD1,NLRC5,LY9,IL37,SELP,POLQ,HDAC4,PSMD3,KLKB1,ICAM1,KNG1,MCM2,MSH3,ACAT1,GABARAPL1,ABHD2,CBFA2T3,IGFBP4,REG3G,CCNA2,CDCA5,GINS4,CDKN2B,KCNMA1,BATF,FANCD2,PPARG,NCF1,TRIM62,RNF126,PTGER1,PDPN,IL17RC,AQP3,MELK,C2,PLK1,TRP…
GO:1902850	Microtubule cytoskeleton organization involved in mitosis	18	112	0.56	0.0035	MYBL2,CCNB1,KIF23,KIF11,NDC80,CENPE,SPC25,PLK1,TPX2,BIRC5,AURKC,TTK,CDC20,KIF4A,PRC1,WDR62,SUN2,NUSAP1
GO:0000226	Microtubule cytoskeleton organization	45	492	0.32	0.0036	MYBL2,MAPRE3,HAUS3,CCNB1,KIF23,KIF11,NDC80,KIF18A,CENPE,BICD1,SPC25,TRIM36,WDR63,PLK1,TPX2,BIRC5,AURKC,TUBB3,MAP1S,CLIP4,SPEF2,ASPM,CENPW,TTK,RSPH9,CDC20,KIF4A,DVL1,FAM179A,BRCA2,BRSK2,BCAS3,PRC1,KIF20A,CDK1,HOOK2,WDR62,SUN2,KIAA1751,DAG1,APC2,AUNIP,NUSAP1,TUBB8,EML2
GO:1901987	Regulation of cell cycle phase transition	42	452	0.32	0.0048	HAUS3,DLGAP5,CCNB1,SIX3,NDC80,PKD1,PSMD3,CENPE,DBF4,CTDSP1,CDCA5,CDKN2B,BUB1B,PLK1,TPX2,CDK2AP2,BIRC5,BUB1,TAOK2,E2F7,BLM,UBE2C,BTN2A2,CENPF,KIF14,TTK,ORC1,CDC20,RBL1,FOXO4,AIF1,UBD,GPNMB,HMMR,CDK1,CDC7,CDC45,GTSE1,PCBP4,HMGA2,XRCC3,FAM83D
GO:0033045	Regulation of sister chromatid segregation	15	83	0.61	0.0049	DLGAP5,CCNB1,NDC80,CENPE,CDCA5,BUB1B,PLK1,BIRC5,BUB1,UBE2C,CENPF,TTK,CDC20,PTTG1,XRCC3
GO:0050727	Regulation of inflammatory response	35	351	0.36	0.0061	OSM,HGF,SERPINE1,IFNG,PROC,APOA1,APOE,SEMA7A,IL37,KLKB1,FANCD2,PPARG,IL17RC,IL16,LPL,NR1D2,PER1,CD6,FFAR3,C2CD4A,TLR9,TGM2,DUSP10,SYT11,GBP5,AGER,GATA3,IL2RA,ADCY7,GGT1,SAA1,IL6,LILRA5,PTPRC,ADAM8
GO:0071345	Cellular response to cytokine stimulus	75	1013	0.23	0.0061	CD4,OSM,MYBL2,HGF,OAS3,IFNG,TFPI,MKKS,NUMBL,CHI3L1,IL36A,TRAF4,CNN2,IL37,HDAC4,PSMD3,ICAM1,MCM2,BATF,TNFRSF13C,TRIM62,IL17RC,BIRC5,IL16,LRP8,CXCL10,CXCL11,PCK1,TNFRSF12A,RORC,IFNLR1,LRAT,IL21R,HLA-DQA1,DFNA5,OAS2,IFI6,ANXA2,ABCD4,PTPN5,HIST1H3J,STAT1,XAF1,CXCL9,AIM2,MCL1,FCGR1B,ABCC2,GBP5,GBP4,RAPGEF1,MMP9,PTPN20A,HLA-DQA2,AIF1,GATA3,IL2RA,GLDC,IL17RE,KHSRP,IFITM3,SAA1,HIST2H3A,IL6,ALAD,JAK3,SNX1…
GO:0000070	Mitotic sister chromatid segregation	17	108	0.55	0.0062	DLGAP5,CCNB1,KIF23,NDC80,KIF18A,CENPE,CDCA5,SMC2,PLK1,AURKC,GSG2,SGOL2,KIF14,CDC20,KIF4A,PRC1,NUSAP1
GO:1901990	Regulation of mitotic cell cycle phase transition	39	416	0.33	0.0071	HAUS3,DLGAP5,CCNB1,NDC80,PKD1,PSMD3,CENPE,CTDSP1,CDCA5,CDKN2B,BUB1B,PLK1,TPX2,CDK2AP2,BIRC5,BUB1,TAOK2,E2F7,BLM,UBE2C,BTN2A2,CENPF,KIF14,TTK,ORC1,CDC20,RBL1,FOXO4,AIF1,UBD,GPNMB,HMMR,CDK1,CDC7,CDC45,GTSE1,PCBP4,HMGA2,XRCC3
GO:0007017	Microtubule-based process	58	727	0.26	0.0073	MYBL2,MAPRE3,HAUS3,DLGAP5,CCNB1,KIF23,KIF11,NDC80,KIF18A,CENPE,BICD1,SPC25,TRIM36,TEKT5,WDR63,PLK1,TPX2,BIRC5,AURKC,TUBB3,KIF15,MAP1S,CLIP4,PRSS55,SPEF2,KIF14,ASPM,CENPW,TTK,RSPH9,CDC20,KIF12,KIF4A,DVL1,FAM179A,BRCA2,BRSK2,BCAS3,KLC3,PRC1,KIF20A,CDK1,HOOK2,WDR60,WDR62,CACNA1I,SUN2,DNAH10,CFAP221,GTSE1,KIAA1751,DAG1,APC2,AUNIP,TEX40,NUSAP1,TUBB8,EML2
GO:0007154	Cell communication	290	5320	0.09	0.0073	CACNG3,CD4,UTS2,SCT,TRIP6,LAG3,FGF22,MADCAM1,OSM,BIRC7,SLC6A2,CD79A,HGF,TSPAN12,CHN2,P2RX5,CLNK,OAS3,IFNG,NRBP1,IGFBP5,AZU1,ANGPTL1,APOA1,KALRN,UNC5CL,MYH2,MKKS,S1PR4,DLGAP5,GNGT1,SGSM3,HCN2,RAF1,APOE,NUMBL,CHI3L1,NTS,CCNB1,DOCK2,TMEM231,BRIP1,IL36A,POU5F1,NDST1,SEMA7A,SMAD2,PKD1,TRAF4,NLRC5,CNN2,IL37,SELP,PKP1,MCOLN1,SHC2,RAB17,HDAC4,PSMD3,ICAM1,EVC,KNG1,GABARAPL1,CLSTN3,INHBE,LMBR1L,ABHD2,IGFBP…
GO:0019221	Cytokine-mediated signaling pathway	55	678	0.27	0.0075	CD4,OSM,HGF,OAS3,IFNG,MKKS,NUMBL,IL36A,TRAF4,CNN2,IL37,PSMD3,ICAM1,BATF,TNFRSF13C,TRIM62,IL17RC,BIRC5,IL16,LRP8,CXCL10,CXCL11,TNFRSF12A,RORC,IFNLR1,IL21R,HLA-DQA1,OAS2,IFI6,ANXA2,HIST1H3J,STAT1,XAF1,CXCL9,AIM2,MCL1,FCGR1B,RAPGEF1,MMP9,HLA-DQA2,GATA3,IL2RA,IL17RE,IFITM3,SAA1,HIST2H3A,IL6,JAK3,CXCR6,CD36,CCR3,ITGAX,TNFRSF9,CCL18,IFI27
GO:0034097	Response to cytokine	79	1101	0.21	0.0085	CD4,OSM,MYBL2,HGF,OAS3,IFNG,TFPI,MKKS,NUMBL,CHI3L1,IL36A,TRAF4,CNN2,IL37,HDAC4,PSMD3,ICAM1,MCM2,LAMP3,BATF,TNFRSF13C,TRIM62,IL17RC,BIRC5,IL16,LRP8,CXCL10,CXCL11,PCK1,TNFRSF12A,RORC,IFNLR1,LRAT,IL21R,HLA-DQA1,DFNA5,OAS2,IFI6,ANXA2,ABCD4,PTPN5,HIST1H3J,STAT1,XAF1,CXCL9,AIM2,MCL1,FCGR1B,ABCC2,GBP5,GBP4,RAPGEF1,MMP9,PTPN20A,HLA-DQA2,AIF1,UBD,GATA3,IL2RA,GLDC,CD274,IL17RE,KHSRP,IFITM3,GGT1,SAA1,HIST2H…
GO:0007088	Regulation of mitotic nuclear division	21	162	0.47	0.0086	DLGAP5,CCNB1,KIF11,NDC80,PKMYT1,CENPE,CDCA5,BUB1B,PLK1,BIRC5,BUB1,UBE2C,CENPF,MKI67,TTK,CDC20,PTTG1,BMP7,XRCC3,NUSAP1,FAM65B
GO:0006641	Triglyceride metabolic process	13	69	0.63	0.0098	SLC22A4,CETP,APOH,PNPLA5,PNPLA3,DGAT2,APOE,PCSK9,LPL,PCK1,AGMO,FABP12,APOC1
GO:0045058	T cell selection	10	40	0.75	0.0098	CD4,DOCK2,LY9,BATF,CD3D,SLAMF6,GATA3,IL6,PTPRC,CD3G
GO:0050776	Regulation of immune response	67	896	0.23	0.0101	CD4,LAG3,MADCAM1,CD79A,CLNK,CRTAM,IFNG,SELL,APOA1,MYH2,RAF1,APOE,SEMA7A,NLRC5,PSMD3,ICAM1,PPARG,TNFRSF13C,C2,CD3D,LAIR2,LRP8,CTLA4,PRKCB,ELMO1,PVRIG,FFAR3,HLA-DQA1,KLHL6,C17orf99,SUSD4,C5AR1,BTN2A2,ITGAL,STAT1,DUSP10,TGFB2,FCGR3A,SLAMF7,SLAMF6,FCER1A,AIM2,CD5L,FCGR1B,GBP5,SH2D1A,RAPGEF1,NCR2,HLA-DQA2,AGER,GATA3,IL2RA,CD274,KLRD1,WIPF1,ADCY7,CD59,IL6,CD8A,JAK3,CD36,PTPRC,C4B,GCSAM,CR1L,CD3G,ADAM8
GO:0051239	Regulation of multicellular organismal process	188	3227	0.12	0.0104	CACNG3,CD4,VASH1,SCT,LAG3,APOH,OSM,HGF,TSPAN12,SERPINE1,SMR3A,CLNK,CRTAM,IFNG,TFPI,IGFBP5,AZU1,PROC,APOA1,KALRN,EGR2,CPNE5,MKKS,APOE,NUMBL,CHI3L1,CCNB1,TAF5L,IL36A,POU5F1,SIX3,SEMA7A,SMAD2,NLRC5,LY9,IL37,SELP,RAB17,HDAC4,PSMD3,KLKB1,ICAM1,KNG1,CLSTN3,RNF157,REG3G,CTDSP1,FGF18,KCNMA1,FANCD2,PPARG,TNFRSF13C,TRIM62,PTGER1,PDPN,IL17RC,AQP3,TRPV3,LTBP3,IL16,PCSK9,LRP8,CTLA4,SIX2,PRKCB,CXCL10,ADRA1B,FA…
GO:0010564	Regulation of cell cycle process	59	760	0.25	0.0107	HAUS3,DLGAP5,CCNB1,KIF23,SIX3,KIF11,NDC80,PKMYT1,PKD1,PSMD3,CENPE,DBF4,CTDSP1,CDCA5,CDKN2B,BUB1B,PLK1,TPX2,CDK2AP2,BIRC5,BUB1,AURKC,TAOK2,E2F7,BLM,UBE2C,BTN2A2,SOX15,CENPF,KIF14,MKI67,TTK,ORC1,CDC20,RBL1,FOXO4,AIF1,UBD,BRCA2,GPNMB,AKT2,CIT,HMMR,PTTG1,PRC1,KIF20A,CDK1,BMP7,CDC7,CDC45,NUGGC,GTSE1,PCBP4,HMGA2,XRCC3,NUSAP1,DUX4,FAM83D,FAM65B
GO:0051983	Regulation of chromosome segregation	16	104	0.54	0.0107	DLGAP5,CCNB1,NDC80,CENPE,CDCA5,BUB1B,PLK1,BIRC5,BUB1,UBE2C,CENPF,MKI67,TTK,CDC20,PTTG1,XRCC3
GO:0007093	Mitotic cell cycle checkpoint	20	156	0.46	0.0126	CCNB1,CDKN2B,BUB1B,FANCD2,PLK1,BIRC5,BUB1,TAOK2,E2F7,BLM,CENPF,TTK,ORC1,CDC20,FOXO4,CDK1,TOP2A,GTSE1,PCBP4,HMGA2
GO:0032101	Regulation of response to external stimulus	73	1013	0.21	0.0126	LAG3,APOH,OSM,HGF,SERPINE1,CLNK,CRTAM,IFNG,TFPI,AZU1,PROC,APOA1,MKKS,RAF1,APOE,SEMA7A,NLRC5,IL37,SELP,PSMD3,KLKB1,KNG1,FGF18,FANCD2,PPARG,PDPN,IL17RC,IL16,LRP8,CXCL10,LPL,NR1D2,PER1,BACE1,SERPINF2,CD6,IFNLR1,FFAR3,PDE6G,PRKD1,SUSD4,ANXA2,SMOC2,C5AR1,C2CD4A,TLR9,STAT1,TGM2,SOX15,DUSP10,SLAMF6,AIM2,SYT11,S100A14,SEMA6C,GBP5,SH2D1A,NCR2,AGER,AIF1,DVL1,GATA3,IL2RA,ADCY7,GGT1,SAA1,IL6,CD36,LILRA5,PTPR…
GO:0042127	Regulation of cell population proliferation	107	1642	0.17	0.0126	CD4,VASH1,APOH,OSM,BIRC7,CRTAM,IFNG,IGFBP5,RAF1,APOE,CCNB1,BRIP1,SIX3,SMAD2,E2F3,HDAC4,CBFA2T3,REG3G,CCNA2,FGF18,CDKN2B,PPARG,TNFRSF13C,RNF126,PDPN,BIRC5,LTBP3,CTLA4,SIX2,SIRPG,CXCL10,SHCBP1,CXCL11,FUZ,SGPP2,SERPINF2,PTH1R,E2F7,CD6,IFNLR1,CEND1,MXI1,PRKD1,DNAJB2,DFNA5,FGFR3,IKZF3,ANXA2,C5AR1,WARS,BTN2A2,PBLD,TLR9,STAT1,IQGAP3,CXCL9,TGM2,SOX15,DUSP10,TGFB2,KIF14,ASPM,SGK1,TTK,AGTR2,RAPGEF1,MMP9,CD…
GO:0051726	Regulation of cell cycle	85	1230	0.2	0.0126	VASH1,MYBL2,IFNG,MAPRE3,HAUS3,DLGAP5,SGSM3,CCNB1,BRIP1,KIF23,SIX3,KIF11,NDC80,PRR11,PKMYT1,PKD1,RNF167,E2F3,PSMD3,CENPE,DBF4,CTDSP1,CCNA2,CDCA5,CDK16,CDKN2B,TRIM36,BUB1B,FANCD2,CCNB2,PLK1,TPX2,CDK2AP2,BIRC5,BUB1,AURKC,TAOK2,CDK20,E2F7,SMOC2,BLM,UBE2C,BTN2A2,SOX15,TGFB2,CENPF,KIF14,ASPM,MKI67,TTK,ORC1,CDC20,RBL1,FOXO4,AIF1,PIM2,UBD,GATA3,BRCA2,GPNMB,AKT2,CIT,HMMR,PTTG1,PRC1,KIF20A,CDK1,BMP7,RUNX3,…
GO:0007166	Cell surface receptor signaling pathway	142	2325	0.14	0.0132	CD4,LAG3,FGF22,MADCAM1,OSM,CD79A,HGF,TSPAN12,P2RX5,CLNK,OAS3,IFNG,ANGPTL1,APOA1,KALRN,UNC5CL,MYH2,MKKS,DLGAP5,RAF1,NUMBL,TMEM231,IL36A,POU5F1,NDST1,SEMA7A,SMAD2,PKD1,TRAF4,CNN2,IL37,SHC2,PSMD3,ICAM1,EVC,INHBE,LMBR1L,ATP6V1C2,FGF18,BATF,NCF1,TNFRSF13C,TRIM62,IL17RC,CD3D,BIRC5,LTBP3,IL16,LRP8,CTLA4,PRKCB,CXCL10,SHCBP1,CXCL11,DDIT4,SUSD5,ELMO1,TUBB3,PTH1R,CD6,LAMA3,PKD2L1,TNFRSF12A,RORC,IFNLR1,PDE6G…
GO:0045785	Positive regulation of cell adhesion	38	423	0.31	0.0148	CD4,IFNG,AZU1,APOA1,MIP,SELP,ICAM1,ANK3,TNFRSF13C,PDPN,CTLA4,SIRPG,SERPINF2,CD6,SMOC2,BTN2A2,TGM2,DUSP10,TGFB2,UTRN,VNN1,PREX1,AGER,AIF1,GATA3,NEDD9,IL2RA,CD274,DNM2,BMP7,RUNX3,SAA1,IL6,JAK3,CD36,PTPRC,DAG1,ADAM8
GO:0030335	Positive regulation of cell migration	44	522	0.28	0.016	TRIP6,MADCAM1,HGF,SERPINE1,IFNG,IGFBP5,SEMA7A,SELP,HDAC4,ICAM1,FGF18,PDPN,CXCL10,PRKD1,RLTPR,SMOC2,C5AR1,TGFB2,S100A14,SEMA6C,NSMF,PREX1,MMP9,FOXO4,AGER,F10,AIF1,GATA3,NEDD9,INSL3,RUFY3,CD274,GPNMB,BCAS3,AKT2,BMP7,SUN2,IL6,PTPRC,FAM115C,GTSE1,ADAM8,ITGAX,FAM65B
GO:0098542	Defense response to other organism	66	900	0.22	0.0162	CD4,CEBPE,SERPINE1,OAS3,IFNG,AZU1,IL36A,NLRC5,LY9,SELP,ICAM1,REG3G,BATF,PPARG,NCF1,TRIM62,IL17RC,C2,CXCL10,DDIT4,CD6,RNF166,IFNLR1,PRKD1,HLA-DQA1,OAS2,IFI6,SUSD4,C5AR1,TLR9,STAT1,XAF1,CXCL9,VNN1,SLAMF7,SLAMF6,AIM2,S100A14,FCGR1B,GBP5,GBP4,MCOLN2,SH2D1A,NCR2,HLA-DQA2,AGER,AIF1,UBD,GATA3,KLRD1,CRCP,IFITM3,SAA1,IL6,JAK3,PRF1,CD36,PLAC8,LILRA5,PTPRC,C4B,KLRF2,PRB3,LYPD8,CCL18,IFI27
GO:0023052	Signaling	282	5239	0.09	0.0171	CACNG3,CD4,UTS2,SCT,TRIP6,LAG3,FGF22,MADCAM1,OSM,BIRC7,SLC6A2,CD79A,HGF,TSPAN12,CHN2,P2RX5,CLNK,OAS3,IFNG,NRBP1,IGFBP5,AZU1,ANGPTL1,APOA1,KALRN,UNC5CL,MYH2,MKKS,S1PR4,DLGAP5,GNGT1,SGSM3,HCN2,RAF1,APOE,NUMBL,CHI3L1,NTS,CCNB1,DOCK2,TMEM231,IL36A,POU5F1,NDST1,SEMA7A,SMAD2,PKD1,TRAF4,NLRC5,CNN2,IL37,SELP,PKP1,MCOLN1,SHC2,RAB17,HDAC4,PSMD3,ICAM1,EVC,KNG1,CLSTN3,INHBE,LMBR1L,ABHD2,IGFBP4,ATP6V1C2,REG3G…
GO:0043368	Positive t cell selection	8	27	0.83	0.0171	DOCK2,LY9,BATF,CD3D,SLAMF6,IL6,PTPRC,CD3G
GO:2000816	Negative regulation of mitotic sister chromatid separation	8	27	0.83	0.0171	BUB1B,PLK1,BIRC5,BUB1,CENPF,TTK,CDC20,PTTG1
GO:0051225	Spindle assembly	14	88	0.56	0.0186	MYBL2,MAPRE3,HAUS3,KIF23,KIF11,TPX2,BIRC5,AURKC,ASPM,CENPW,CDC20,KIF4A,PRC1,TUBB8
GO:0071310	Cellular response to organic substance	143	2369	0.14	0.0186	CD4,CEBPE,FGF22,OSM,MYBL2,HGF,SERPINE1,DGAT2,OAS3,IFNG,TFPI,IGFBP5,EGR2,MKKS,HCN2,RAF1,NUMBL,CHI3L1,CCNB1,BRIP1,IL36A,POU5F1,NDST1,SMAD2,TRAF4,CNN2,KIF18A,IL37,HDAC4,PSMD3,ICAM1,MCM2,ABHD2,ATP6V1C2,CCNA2,FGF18,BATF,PPARG,TNFRSF13C,TRIM62,RNF126,PTGER1,IL17RC,BIRC5,LTBP3,IL16,PCSK9,LRP8,PRKCB,CXCL10,SHCBP1,CXCL11,DDIT4,LPL,NR1D2,ADCY6,BACE1,PCK1,CD6,TNFRSF12A,RORC,IFNLR1,FFAR3,NRROS,PRKD1,OR10H1,L…
GO:0040017	Positive regulation of locomotion	46	562	0.27	0.0187	TRIP6,MADCAM1,HGF,SERPINE1,IFNG,IGFBP5,AZU1,SEMA7A,SELP,HDAC4,ICAM1,FGF18,PDPN,IL16,CXCL10,PRKD1,RLTPR,SMOC2,C5AR1,TGFB2,S100A14,SEMA6C,NSMF,PREX1,MMP9,FOXO4,AGER,F10,AIF1,GATA3,NEDD9,INSL3,RUFY3,CD274,GPNMB,BCAS3,AKT2,BMP7,SUN2,IL6,PTPRC,FAM115C,GTSE1,ADAM8,ITGAX,FAM65B
GO:0050766	Positive regulation of phagocytosis	12	66	0.62	0.0187	IFNG,AZU1,APOA1,DOCK2,PPARG,C2,SIRPG,RAPGEF1,DNM2,CD36,PTPRC,C4B
GO:1901991	Negative regulation of mitotic cell cycle phase transition	24	219	0.4	0.0189	CCNB1,PSMD3,CTDSP1,CDKN2B,BUB1B,PLK1,CDK2AP2,BIRC5,BUB1,TAOK2,E2F7,BLM,BTN2A2,CENPF,TTK,ORC1,CDC20,RBL1,FOXO4,GPNMB,CDK1,GTSE1,PCBP4,HMGA2
GO:0048584	Positive regulation of response to stimulus	137	2257	0.14	0.0194	CACNG3,CD4,FAM168A,SCT,TRIP6,LAG3,APOH,FGF22,OSM,BIRC7,CD79A,HGF,SERPINE1,P2RX5,CLNK,CRTAM,IFNG,IGFBP5,AZU1,APOA1,UNC5CL,MYH2,RAF1,APOE,FUS,CHI3L1,IL36A,POU5F1,NDST1,SEMA7A,SMAD2,TRAF4,NLRC5,IL37,SELP,SHC2,PSMD3,KLKB1,ICAM1,EVC,INHBE,IGFBP4,ATP6V1C2,REG3G,FGF18,GPR174,CDKN2B,NCF1,TNFRSF13C,TRIM62,PDPN,IL17RC,C2,CD3D,IL16,CTLA4,PRKCB,CXCL10,ADRA1B,LPL,TAOK2,ELMO1,BANK1,SERPINF2,ITM2C,CD6,TNFRSF12A…
GO:0009987	Cellular process	707	15024	0.03	0.0203	CACNG3,TMEM132A,CD4,UTS2,ACTL6B,VASH1,BPIFB2,REXO1,SCT,TRIP6,SLC22A4,CETP,TGM6,LAG3,APOH,CEBPE,FGF22,MADCAM1,OSM,ASPHD2,PNPLA5,PNPLA3,UPK3A,MYBL2,BIRC7,PLLP,SLC6A2,CYP4F3,CLASRP,CYP4F2,CD79A,ERF,HGF,TFPI2,TSPAN12,CHN2,SERPINE1,SFXN3,P2RX5,HLF,CLNK,CRTAM,DGAT2,OAS3,IFNG,AGXT2,ABTB1,MAPRE3,TFPI,NRBP1,IGFBP5,AZU1,PROC,ANGPTL1,SELL,SLC5A9,APOA1,FLVCR2,KALRN,EGR2,HAUS3,UNC5CL,CPNE5,MYH2,MKKS,S1PR4,MMP…
GO:0140013	Meiotic nuclear division	19	152	0.45	0.0203	BRIP1,KIF18A,MSH3,SMC2,BUB1B,FANCD2,PLK1,BUB1,HORMAD2,SGOL2,ASPM,TTK,RAD54L,BRCA2,PTTG1,TOP2A,TEX40,TUBB8,REC8
GO:0061041	Regulation of wound healing	18	140	0.47	0.0215	APOH,SERPINE1,TFPI,PROC,APOE,SELP,KLKB1,KNG1,REG3G,PDPN,SERPINF2,TNFRSF12A,ANXA2,SMOC2,DUSP10,AGER,INSL3,CD36
GO:0072539	T-helper 17 cell differentiation	5	8	1.15	0.0219	LY9,BATF,RORC,SLAMF6,IL6
GO:0007165	Signal transduction	263	4876	0.09	0.0255	CD4,UTS2,SCT,TRIP6,LAG3,FGF22,MADCAM1,OSM,BIRC7,CD79A,HGF,TSPAN12,CHN2,P2RX5,CLNK,OAS3,IFNG,NRBP1,IGFBP5,AZU1,ANGPTL1,APOA1,KALRN,UNC5CL,MYH2,MKKS,S1PR4,DLGAP5,GNGT1,SGSM3,RAF1,APOE,NUMBL,CHI3L1,NTS,CCNB1,DOCK2,TMEM231,IL36A,POU5F1,NDST1,SEMA7A,SMAD2,PKD1,TRAF4,NLRC5,CNN2,IL37,SELP,PKP1,MCOLN1,SHC2,RAB17,HDAC4,PSMD3,ICAM1,EVC,KNG1,INHBE,LMBR1L,ABHD2,IGFBP4,ATP6V1C2,REG3G,CCNA2,FGF18,GPR174,ANK3,B…
GO:0007346	Regulation of mitotic cell cycle	52	676	0.24	0.0255	HAUS3,DLGAP5,CCNB1,KIF11,NDC80,PKMYT1,PKD1,PSMD3,CENPE,CTDSP1,CDCA5,CDKN2B,BUB1B,FANCD2,PLK1,TPX2,CDK2AP2,BIRC5,BUB1,TAOK2,E2F7,SMOC2,BLM,UBE2C,BTN2A2,CENPF,KIF14,MKI67,TTK,ORC1,CDC20,RBL1,FOXO4,AIF1,PIM2,UBD,BRCA2,GPNMB,HMMR,PTTG1,CDK1,BMP7,CDC7,CDC45,TOP2A,GTSE1,PCBP4,HMGA2,XRCC3,NUSAP1,MAP4K1,FAM65B
GO:0032501	Multicellular organismal process	358	6933	0.07	0.0255	CACNG3,CD4,UTS2,ACTL6B,VASH1,SCT,TRIP6,CETP,APOH,CEBPE,OSM,UPK3A,PLLP,SLC6A2,CYP4F2,CD79A,HGF,TFPI2,TSPAN12,SERPINE1,P2RX5,HLF,DGAT2,IFNG,TFPI,IGFBP5,AZU1,PROC,ANGPTL1,APOA1,KALRN,EGR2,CPNE5,MYH2,MKKS,MMP24,KRT13,GNGT1,ADAMTS2,KRT33B,RAF1,APOE,NUMBL,OC90,MTL5,CHI3L1,MICALCL,CCNB1,DOCK2,ZCCHC11,MIP,TMEM231,BRIP1,POU5F1,SIX3,NDST1,FAT2,SEMA7A,MSR1,SMAD2,PKD1,TRAF4,GINS1,KIF18A,LY9,ASF1B,CHRDL2,PKP1…
GO:0048878	Chemical homeostasis	77	1124	0.19	0.0255	CD4,SCT,CETP,PNPLA5,PNPLA3,UPK3A,CYP4F2,P2RX5,DGAT2,IGFBP5,APOA1,S1PR4,RAF1,APOE,MTL5,PKD1,MCOLN1,CLDN16,ICAM1,KNG1,ATP6V1C2,GPR174,ANK3,KCNMA1,PPARG,PTGER1,ACOX1,AQP3,EPB42,TRPV3,PCSK9,PRKCB,CXCL10,ADRA1B,CXCL11,MT1E,LPL,NR1D2,CYP4A11,ADCY6,GLS,PCK1,PTH1R,MT1H,IFI6,CA7,SLC26A3,C5AR1,ANK2,ATP2A1,STAT1,CXCL9,TGM2,KCNJ10,S100A14,ABCC2,MCOLN2,AGTR2,LIN28A,FOXO4,SLC30A2,AGER,MT1M,TMPRSS6,ADCY7,CDH23,…
GO:0000075	Cell cycle checkpoint	22	198	0.4	0.0258	CCNB1,BRIP1,CDKN2B,BUB1B,FANCD2,PLK1,BIRC5,BUB1,TAOK2,E2F7,BLM,CENPF,TTK,ORC1,CDC20,FOXO4,CDK1,CDC45,TOP2A,GTSE1,PCBP4,HMGA2
GO:0010033	Response to organic substance	173	3011	0.12	0.0284	CD4,CEBPE,FGF22,OSM,MYBL2,HGF,SERPINE1,P2RX5,DGAT2,OAS3,IFNG,TFPI,IGFBP5,SELL,APOA1,EGR2,MKKS,HCN2,RAF1,NUMBL,CHI3L1,CCNB1,BRIP1,IL36A,POU5F1,NDST1,SMAD2,TRAF4,CNN2,KIF18A,IL37,SELP,HDAC4,PSMD3,ICAM1,MCM2,ADH4,LAMP3,ACAT1,ABHD2,ATP6V1C2,REG3G,CCNA2,FGF18,KCNMA1,BATF,PPARG,TNFRSF13C,TRIM62,RNF126,PTGER1,IL17RC,AQP3,BIRC5,LTBP3,IL16,PCSK9,LRP8,PRKCB,CXCL10,SHCBP1,CXCL11,DDIT4,LPL,NR1D2,ADCY6,PER1,B…
GO:0045839	Negative regulation of mitotic nuclear division	9	40	0.71	0.0284	BUB1B,PLK1,BIRC5,BUB1,CENPF,TTK,CDC20,PTTG1,BMP7
GO:0048522	Positive regulation of cellular process	295	5579	0.08	0.0285	CACNG3,CD4,FAM168A,ACTL6B,SCT,TRIP6,LAG3,CEBPE,FGF22,MADCAM1,OSM,MYBL2,BIRC7,HGF,SERPINE1,P2RX5,HLF,CRTAM,DGAT2,IFNG,AGXT2,MAPRE3,IGFBP5,AZU1,PROC,APOA1,KALRN,EGR2,UNC5CL,CPNE5,DLGAP5,RAF1,APOE,NUMBL,UBE2M,FUS,CHI3L1,CCNB1,DOCK2,MIP,TAF5L,IL36A,POU5F1,KIF23,SIX3,NDC80,NDST1,SEMA7A,MSR1,SMAD2,PKD1,TRAF4,NLRC5,E2F3,IL37,SELP,SHC2,HDAC4,PSMD3,KLKB1,ICAM1,EVC,KNG1,CENPE,DBF4,TEF,CLSTN3,INHBE,CBFA2T3,…
GO:0007094	Mitotic spindle assembly checkpoint	7	23	0.84	0.0293	BUB1B,PLK1,BIRC5,BUB1,CENPF,TTK,CDC20
GO:0001817	Regulation of cytokine production	55	742	0.23	0.0326	CD4,LAG3,OSM,HGF,SERPINE1,CLNK,CRTAM,IFNG,AZU1,APOA1,IL36A,SEMA7A,NLRC5,LY9,IL37,TNFRSF13C,IL17RC,IL16,LPL,PER1,BANK1,SERPINF2,CD6,FFAR3,C5AR1,BTN2A2,TLR9,STAT1,TGFB2,SLAMF6,AIM2,SYT11,GBP5,MCOLN2,AGTR2,AGER,CARD17,AIF1,GATA3,CD274,GPNMB,ZBTB32,ADCY7,CRCP,SAA1,IL6,LTBP1,JAK3,CD36,LILRA5,ARRB1,PTPRC,TIGIT,ADAM8,TNFRSF9
GO:0006639	Acylglycerol metabolic process	14	97	0.52	0.0326	SLC22A4,CETP,APOH,PNPLA5,PNPLA3,DGAT2,APOE,ABHD2,PCSK9,LPL,PCK1,AGMO,FABP12,APOC1
GO:0050801	Ion homeostasis	58	796	0.22	0.0326	CD4,CETP,UPK3A,CYP4F2,P2RX5,DGAT2,APOA1,S1PR4,APOE,MTL5,PKD1,MCOLN1,CLDN16,KNG1,ATP6V1C2,GPR174,ANK3,KCNMA1,PTGER1,EPB42,TRPV3,PRKCB,CXCL10,ADRA1B,CXCL11,MT1E,CYP4A11,GLS,PTH1R,MT1H,IFI6,CA7,SLC26A3,C5AR1,ANK2,ATP2A1,CXCL9,TGM2,KCNJ10,S100A14,ABCC2,MCOLN2,AGTR2,SLC30A2,MT1M,TMPRSS6,CDH23,MYO5A,SAA1,SNX10,CXCR6,CD36,SLC35G1,PTPRC,PDK2,CCR3,MT1HL1,SLC9A7
GO:0007062	Sister chromatid cohesion	9	42	0.69	0.033	CDCA5,BUB1B,PLK1,BUB1,GSG2,HORMAD2,SGOL2,CDC20,REC8
GO:0030155	Regulation of cell adhesion	53	712	0.23	0.0357	CD4,LAG3,SERPINE1,CRTAM,IFNG,AZU1,APOA1,MIP,PKD1,SELP,ICAM1,KNG1,ANK3,TNFRSF13C,PDPN,CTLA4,SIRPG,SERPINF2,CD6,LAMA3,SMOC2,C2CD4A,BTN2A2,TGM2,DUSP10,TGFB2,KIF14,UTRN,VNN1,PREX1,AGER,AIF1,GATA3,NEDD9,IL2RA,CD274,GPNMB,DNM2,LAMA1,BCAS3,SPOCK1,BMP7,RUNX3,SAA1,IL6,KIAA0922,JAK3,CD36,PTPRC,TIGIT,DAG1,ADAM8,FAM65B
GO:0090307	Mitotic spindle assembly	9	43	0.68	0.0369	MYBL2,KIF23,KIF11,TPX2,BIRC5,AURKC,CDC20,KIF4A,PRC1
GO:0006968	Cellular defense response	10	54	0.62	0.0398	NCF1,C5AR1,CXCL9,FAIM3,CD5L,SH2D1A,NCR2,LSP1,PRF1,CCR3
GO:0001819	Positive regulation of cytokine production	38	461	0.27	0.0412	CD4,OSM,HGF,SERPINE1,CLNK,CRTAM,IFNG,AZU1,IL36A,SEMA7A,LY9,TNFRSF13C,IL17RC,IL16,LPL,SERPINF2,CD6,FFAR3,C5AR1,TLR9,STAT1,SLAMF6,AIM2,GBP5,MCOLN2,AGTR2,AGER,AIF1,GATA3,CD274,CRCP,SAA1,IL6,CD36,LILRA5,PTPRC,TIGIT,ADAM8
GO:0051241	Negative regulation of multicellular organismal process	81	1231	0.17	0.0416	VASH1,SCT,LAG3,APOH,HGF,SERPINE1,IFNG,TFPI,IGFBP5,PROC,APOA1,APOE,SIX3,SEMA7A,NLRC5,IL37,HDAC4,KLKB1,KNG1,REG3G,CTDSP1,KCNMA1,PPARG,TRIM62,PTGER1,TRPV3,LTBP3,PCSK9,CTLA4,CXCL10,ADCY6,FUZ,TMEM25,BANK1,SERPINF2,ITM2C,CEND1,INPP5J,SPRED3,ANXA2,BTN2A2,ATP2A1,PBLD,TLR9,STAT1,SOX15,DUSP10,TGFB2,ASPM,SYT11,EFNA3,SEMA6C,AGTR2,MMP9,LIN28A,FOXO4,AGER,CARD17,GATA3,BRCA2,RUFY3,CD274,GPNMB,ADCY7,SPOCK1,ULK2,B…
GO:0048513	Animal organ development	180	3197	0.11	0.0418	CD4,ACTL6B,VASH1,SCT,CEBPE,UPK3A,CD79A,HGF,TSPAN12,SERPINE1,HLF,DGAT2,IFNG,IGFBP5,APOA1,KALRN,EGR2,MKKS,KRT13,GNGT1,ADAMTS2,KRT33B,RAF1,NUMBL,OC90,CHI3L1,CCNB1,DOCK2,MIP,TMEM231,BRIP1,POU5F1,SIX3,NDST1,SEMA7A,SMAD2,PKD1,TRAF4,KIF18A,LY9,CHRDL2,PKP1,HDAC4,ICAM1,EVC,MCM2,ACAT1,LMBR1L,CBFA2T3,CCNA2,FGF18,CDKN2B,BARX2,HOXA10,BATF,FANCD2,PPARG,CCNB2,PDPN,AQP3,MELK,EPB42,CD3D,LTBP3,SLC23A1,PCSK9,LRP8,S…
GO:0000727	Double-strand break repair via break-induced replication	5	11	1.01	0.0455	MCM4,MCM2,GINS4,CDC7,CDC45
GO:1902969	Mitotic dna replication	5	11	1.01	0.0455	MCM4,GINS1,MCM2,BRCA2,CDC45
