# Supplementary material for: Gene Expression Profiling in Coeliac Disease Confirmed the Key Role of the Immune System and Revealed a Molecular Overlap with Non-Celiac Gluten Sensitivity
Source: Int J Mol Sci. 2023 Apr 24;24(9):7769. doi: 10.3390/ijms24097769 (PMC10178871; doi:10.3390/ijms24097769)
Supplement: Supplementary file 1 [file ijms-24-07769-s001.zip › Supplementary Table S3.xlsx]

## Sheet: KEGG
Enriched pathways
#term ID	term description	observed gene count	background gene count	strength	false discovery rate	matching proteins in the network
hsa04110	Cell cycle	21	120	0.6	0.00016	CCNB1,MCM4,SMAD2,PKMYT1,E2F3,MCM2,DBF4,CCNA2,CDKN2B,BUB1B,CCNB2,PLK1,BUB1,TTK,ORC1,CDC20,RBL1,PTTG1,CDK1,CDC7,E2F5
hsa00830	Retinol metabolism	12	64	0.63	0.0101	CYP2C9,UGT2B10,ADH4,RETSAT,UGT2B7,SDR16C5,CYP4A11,LRAT,CYP3A4,UGT2B15,UGT2B11,CYP3A7
hsa04610	Complement and coagulation cascades	13	82	0.56	0.0101	SERPINE1,TFPI,PROC,KLKB1,KNG1,C2,SERPINF2,C5AR1,F10,CD59,C4B,CR1L,ITGAX
hsa04659	Th17 cell differentiation	15	101	0.53	0.0101	CD4,IFNG,SMAD2,CD3D,RORC,IL21R,HLA-DQA1,STAT1,HLA-DQA2,GATA3,IL2RA,IL6,HLA-DOB,JAK3,CD3G
hsa05166	Human T-cell leukemia virus 1 infection	24	211	0.41	0.0101	CD4,EGR2,SMAD2,E2F3,ICAM1,CCNA2,CDKN2B,BUB1B,CCNB2,TNFRSF13C,CD3D,ADCY6,HLA-DQA1,ITGAL,CDC20,HLA-DQA2,IL2RA,AKT2,PTTG1,ADCY7,IL6,HLA-DOB,JAK3,CD3G
hsa05340	Primary immunodeficiency	9	37	0.74	0.0101	CD4,CD79A,TNFRSF13C,CD3D,TAP1,TAP2,CD8A,JAK3,PTPRC
hsa04514	Cell adhesion molecules	17	137	0.45	0.0133	CD4,MADCAM1,SELL,SELP,CLDN16,ICAM1,CTLA4,CD6,HLA-DQA1,ITGAL,HLA-DQA2,CD274,CLDN14,CD8A,HLA-DOB,PTPRC,TIGIT
hsa04062	Chemokine signaling pathway	20	186	0.39	0.018	GNGT1,RAF1,DOCK2,SHC2,NCF1,PRKCB,CXCL10,CXCL11,ADCY6,ELMO1,STAT1,CXCL9,PREX1,AKT2,ADCY7,JAK3,CXCR6,ARRB1,CCR3,CCL18
hsa04640	Hematopoietic cell lineage	13	91	0.51	0.018	CD4,CD3D,CD37,HLA-DQA1,HLA-DQA2,IL2RA,CD59,IL6,CD8A,HLA-DOB,CD36,CR1L,CD3G
hsa05144	Malaria	9	46	0.65	0.018	HGF,IFNG,SELP,ICAM1,ITGAL,TLR9,IL6,CD36,CR1L
hsa05169	Epstein-Barr virus infection	20	193	0.37	0.0205	OAS3,E2F3,PSMD3,ICAM1,CCNA2,CD3D,CXCL10,HLA-DQA1,OAS2,TAP1,ITGAL,STAT1,TAP2,HLA-DQA2,AKT2,RUNX3,IL6,HLA-DOB,JAK3,CD3G
hsa05321	Inflammatory bowel disease	10	60	0.58	0.0205	IFNG,SMAD2,RORC,IL21R,HLA-DQA1,STAT1,HLA-DQA2,GATA3,IL6,HLA-DOB
hsa05150	Staphylococcus aureus infection	12	86	0.5	0.0219	KRT13,KRT33B,SELP,ICAM1,C2,HLA-DQA1,C5AR1,ITGAL,FCGR3A,HLA-DQA2,HLA-DOB,C4B
hsa04658	Th1 and Th2 cell differentiation	12	87	0.5	0.0223	CD4,IFNG,CD3D,HLA-DQA1,STAT1,HLA-DQA2,GATA3,IL2RA,RUNX3,HLA-DOB,JAK3,CD3G
hsa05143	African trypanosomiasis	7	36	0.65	0.0442	IFNG,APOA1,ICAM1,KNG1,PRKCB,TLR9,IL6
hsa05332	Graft-versus-host disease	7	36	0.65	0.0442	IFNG,HLA-DQA1,HLA-DQA2,KLRD1,IL6,HLA-DOB,PRF1
hsa04979	Cholesterol metabolism	8	48	0.58	0.045	CETP,APOH,APOA1,APOE,PCSK9,LPL,CD36,APOC1

## Sheet: Reactome
Enriched pathways
#term ID	term description	observed gene count	background gene count	strength	false discovery rate	matching proteins in your network (IDs)	matching proteins in the network
HSA-1640170	Cell Cycle	55	647	0.29	0.0166	9606.ENSP00000217026,9606.ENSP00000243706,9606.ENSP00000254508,9606.ENSP00000256442,9606.ENSP00000259008,9606.ENSP00000260363,9606.ENSP00000261597,9606.ENSP00000262105,9606.ENSP00000262300,9606.ENSP00000262460,9606.ENSP00000262904,9606.ENSP00000263181,9606.ENSP00000264639,9606.ENSP00000265056,9606.ENSP00000265148,9606.ENSP00000265728,9606.ENSP00000274026,9606.ENSP00000275517,9606.ENSP00000276533,…	MYBL2,HAUS3,NUP210,CCNB1,BRIP1,KIF23,NDC80,MCM4,PKMYT1,GINS1,E2F3,KIF18A,PSMD3,MCM2,CENPE,DBF4,CCNA2,CDCA5,GINS4,CDKN2B,SPC25,SMC2,BUB1B,CCNB2,PLK1,TPX2,TK1,BUB1,PRKCB,TUBB3,CASC5,BLM,UBE2C,SGOL2,CENPF,SYNE1,ORC1,CDC20,RBL1,BRCA2,AKT2,HMMR,PTTG1,KIF20A,CDK1,SUN2,CDC7,E2F5,CDC45,TOP2A,HJURP,GTSE1,PCBP4,TUBB8,REC8
HSA-168256	Immune System	127	1956	0.17	0.0166	9606.ENSP00000011653,9606.ENSP00000170150,9606.ENSP00000203629,9606.ENSP00000215637,9606.ENSP00000215781,9606.ENSP00000221972,9606.ENSP00000222390,9606.ENSP00000227348,9606.ENSP00000228928,9606.ENSP00000229135,9606.ENSP00000233997,9606.ENSP00000236147,9606.ENSP00000245503,9606.ENSP00000251849,9606.ENSP00000253023,9606.ENSP00000254508,9606.ENSP00000255409,9606.ENSP00000256935,9606.ENSP00000259211,…	CD4,BPIFB2,LAG3,MADCAM1,OSM,CD79A,HGF,CRTAM,OAS3,IFNG,AZU1,SELL,MYH2,RAF1,UBE2M,NUP210,CHI3L1,DOCK2,IL36A,KIF23,KIF11,NLRC5,CNN2,KIF18A,IL37,PKP1,PSMD3,ICAM1,CENPE,ATP6V1C2,REG3G,TRIM36,BATF,NCF1,TNFRSF13C,TRIM62,RNF126,IL17RC,C2,CD3D,LAIR2,IL16,CTLA4,PRKCB,CXCL10,SPSB4,ELMO1,TUBB3,KIF15,TNFRSF12A,RORC,IFNLR1,MMP25,IL21R,OAS2,IFI6,ANXA2,TAP1,C5AR1,UBE2C,BTN2A2,ITGAL,DOK3,PTPN5,TLR9,STAT1,XAF1,CHI…
HSA-69278	Cell Cycle, Mitotic	47	518	0.31	0.0166	9606.ENSP00000217026,9606.ENSP00000243706,9606.ENSP00000254508,9606.ENSP00000256442,9606.ENSP00000260363,9606.ENSP00000261597,9606.ENSP00000262105,9606.ENSP00000262300,9606.ENSP00000262460,9606.ENSP00000262904,9606.ENSP00000263181,9606.ENSP00000264639,9606.ENSP00000265056,9606.ENSP00000265148,9606.ENSP00000265728,9606.ENSP00000274026,9606.ENSP00000275517,9606.ENSP00000276533,9606.ENSP00000276925,…	MYBL2,HAUS3,NUP210,CCNB1,KIF23,NDC80,MCM4,PKMYT1,GINS1,E2F3,KIF18A,PSMD3,MCM2,CENPE,DBF4,CCNA2,CDCA5,GINS4,CDKN2B,SPC25,SMC2,BUB1B,CCNB2,PLK1,TPX2,TK1,BUB1,PRKCB,TUBB3,CASC5,UBE2C,SGOL2,CENPF,ORC1,CDC20,RBL1,AKT2,HMMR,PTTG1,KIF20A,CDK1,CDC7,E2F5,CDC45,TOP2A,GTSE1,TUBB8
HSA-983189	Kinesins	12	59	0.66	0.0205	9606.ENSP00000260363,9606.ENSP00000260731,9606.ENSP00000263181,9606.ENSP00000265148,9606.ENSP00000301332,9606.ENSP00000320295,9606.ENSP00000324020,9606.ENSP00000363232,9606.ENSP00000363524,9606.ENSP00000375810,9606.ENSP00000378356,9606.ENSP00000456206	KIF23,KIF11,KIF18A,CENPE,KIFC2,TUBB3,KIF15,KIF12,KIF4A,KLC3,KIF20A,TUBB8
HSA-69620	Cell Cycle Checkpoints	28	269	0.37	0.0277	9606.ENSP00000256442,9606.ENSP00000259008,9606.ENSP00000261597,9606.ENSP00000262105,9606.ENSP00000262300,9606.ENSP00000263181,9606.ENSP00000264639,9606.ENSP00000265056,9606.ENSP00000265148,9606.ENSP00000265728,9606.ENSP00000274026,9606.ENSP00000282074,9606.ENSP00000287598,9606.ENSP00000288207,9606.ENSP00000300093,9606.ENSP00000302530,9606.ENSP00000335463,9606.ENSP00000347232,9606.ENSP00000348838,…	CCNB1,BRIP1,NDC80,MCM4,PKMYT1,KIF18A,PSMD3,MCM2,CENPE,DBF4,CCNA2,SPC25,BUB1B,CCNB2,PLK1,BUB1,CASC5,BLM,UBE2C,SGOL2,CENPF,ORC1,CDC20,CDK1,CDC7,CDC45,GTSE1,PCBP4
HSA-2500257	Resolution of Sister Chromatid Cohesion	17	122	0.5	0.0285	9606.ENSP00000256442,9606.ENSP00000261597,9606.ENSP00000263181,9606.ENSP00000265148,9606.ENSP00000275517,9606.ENSP00000282074,9606.ENSP00000287598,9606.ENSP00000288207,9606.ENSP00000300093,9606.ENSP00000302530,9606.ENSP00000320295,9606.ENSP00000335463,9606.ENSP00000350447,9606.ENSP00000355922,9606.ENSP00000361540,9606.ENSP00000378699,9606.ENSP00000456206	CCNB1,NDC80,KIF18A,CENPE,CDCA5,SPC25,BUB1B,CCNB2,PLK1,BUB1,TUBB3,CASC5,SGOL2,CENPF,CDC20,CDK1,TUBB8

## Sheet: Wiki
Enriched pathways
#term ID	term description	observed gene count	background gene count	strength	false discovery rate	matching proteins in the network
WP179	Cell cycle	22	119	0.62	7.54e-05	CCNB1,MCM4,SMAD2,PKMYT1,E2F3,MCM2,DBF4,CCNA2,CDKN2B,CCNB2,PLK1,BUB1,TGFB2,TTK,ORC1,CDC20,RBL1,PTTG1,CDK1,CDC7,E2F5,CDC45
WP2361	Gastric cancer network 1	10	28	0.91	0.00092	MYBL2,MCM4,TPX2,E2F7,KIF15,SMOC2,UBE2C,CENPF,GATS,TOP2A
WP2446	Retinoblastoma gene in cancer	14	87	0.56	0.0193	RAF1,CCNB1,MCM4,E2F3,CCNA2,SMC2,CCNB2,TTK,ORC1,KIF4A,CDK1,CDC7,CDC45,TOP2A
WP3929	Chemokine signaling pathway	19	164	0.42	0.039	GNGT1,RAF1,DOCK2,SHC2,NCF1,PRKCB,CXCL10,CXCL11,ADCY6,ELMO1,STAT1,CXCL9,PREX1,AKT2,ADCY7,JAK3,CXCR6,ARRB1,CCR3
WP4522	Metabolic pathway of LDL, HDL and TG, including diseases	6	16	0.93	0.039	CETP,APOA1,APOE,PCSK9,LPL,ANXA2
