# Supplementary material for: Gene Expression Profiling in Coeliac Disease Confirmed the Key Role of the Immune System and Revealed a Molecular Overlap with Non-Celiac Gluten Sensitivity
Source: Int J Mol Sci. 2023 Apr 24;24(9):7769. doi: 10.3390/ijms24097769 (PMC10178871; doi:10.3390/ijms24097769)
Supplement: Supplementary file 1 [file ijms-24-07769-s001.zip › Supplementary Table S4.xlsx]

## Sheet: Canonical Pathways
Ingenuity Canonical Pathways	-log(p-value)	Ratio	z-score	Molecules
Macrophage Classical Activation Signaling Pathway	2.45	0.0847	3	CXCL10,CXCL11,CXCL9,GBP4,HLA-DOB,HLA-DQA1,HLA-DQA2,IFNG,IL36A,IL37,IL6,OSM,PPARG,STAT1,TGFB2,TLR9
Th1 Pathway	4.6	0.131	2.887	CD274,CD3D,CD3G,CD4,CD8A,GATA3,HLA-DOB,HLA-DQA1,HLA-DQA2,ICAM1,IFNG,IL6,JAK3,KLRD1,RUNX3,STAT1
Pathogen Induced Cytokine Storm Signaling Pathway	2.74	0.0728	2.887	AIM2,CCL18,CCR3,COL11A2,COL19A1,COL20A1,COL25A1,COL27A1,CXCL10,CXCL11,CXCL9,GSDME,HLA-DOB,HLA-DQA1,HLA-DQA2,IFNG,IL21R,IL36A,IL37,IL6,NLRC5,OSM,PRF1,RORC,STAT1,TGFB2,TLR9
Kinetochore Metaphase Signaling Pathway	6.45	0.162	2.5	BIRC5,BUB1,BUB1B,CCNB1,CDC20,CDK1,CENPE,CENPW,DNAH10,ENSA,KNL1,NDC80,PLK1,PTTG1,REC8,SKA3,SPC25,TTK
Crosstalk between Dendritic Cells and Natural Killer Cells	1.16	0.0769	2.449	FSCN2,IFNG,IL6,ITGAL,KLRD1,PRF1,TLR9
Cyclins and Cell Cycle Regulation	3.29	0.129	2.333	CCNA2,CCNB1,CCNB2,CDK1,CDKN2B,E2F3,E2F5,E2F7,HDAC3,RBL1,TGFB2
Role Of Osteoblasts In Rheumatoid Arthritis Signaling Pathway	1.21	0.0615	2.324	AKT2,APC2,BMP7,DVL1,IFNG,IL36A,IL37,IL6,JAK3,MMP24,MMP25,MMP9,OSM,STAT1,TGFB2
Interferon Signaling	1.89	0.139	2.236	IFI6,IFITM3,IFNG,STAT1,TAP1
Multiple Sclerosis Signaling Pathway	2.14	0.0766	2.183	C2,CTLA4,HLA-DOB,HLA-DQA1,HLA-DQA2,IFNG,IL17RC,IL2RA,IL36A,IL37,IL6,MMP9,OSM,PPARG,STAT1,TGFB2,TLR9
Mitotic Roles of Polo-Like Kinase	4.23	0.164	2.121	CCNB1,CCNB2,CDC20,CDC7,CDK1,KIF11,KIF23,PKMYT1,PLK1,PRC1,PTTG1
Th2 Pathway	2.97	0.102	2.121	CCR3,CD3D,CD3G,CD4,CXCR6,GATA3,HLA-DOB,HLA-DQA1,HLA-DQA2,ICAM1,IFNG,IL2RA,JAK3,RUNX3
Leukocyte Extravasation Signaling	1.36	0.0674	2.111	CLDN14,CLDN16,GNAI2,ICAM1,ITGAL,MMP24,MMP25,MMP9,NCF1,PRKCB,PRKD1,RASSF5,WIPF1
