# Supplementary material for: Gene Expression Profiling in Coeliac Disease Confirmed the Key Role of the Immune System and Revealed a Molecular Overlap with Non-Celiac Gluten Sensitivity
Source: Int J Mol Sci. 2023 Apr 24;24(9):7769. doi: 10.3390/ijms24097769 (PMC10178871; doi:10.3390/ijms24097769)
Supplement: Supplementary file 1 [file ijms-24-07769-s001.zip › Supplementary Table S5.xlsx]

## Sheet: Upstream Analysis
Upstream Regulator	Expr Fold Change	Molecule Type	Predicted Activation State	Activation z-score	p-value of overlap	Target Molecules in Dataset
Eldr		other	Activated	5.657	5.32e-31	ASPM,BIRC5,BLM,BUB1,CCNA2,CCNB1,CDCA5,CDK1,CENPF,CEP55,DEPDC1,DLGAP5,FAM83D,GTSE1,HJURP,HMMR,IQGAP3,KIF11,KIF14,KIF20A,KIF23,KIF4A,MKI67,MYBL2,ORC1,PLK1,PTTG1,SPC25,TOP2A,TPX2,TTK,UBE2C
PCLAF	1.204	other	Activated	3.769	5.09e-18	BUB1,BUB1B,CCNA2,CCNB1,CCNB2,CDC20,CDK1,CDKN2B,CENPE,KIF4A,ORC1,PKMYT1,PLK1,PTTG1,TGFB2,TOP2A,TTK,UBE2C
CSF2		cytokine	Activated	5.354	2.68e-16	ADAM8,ARRB1,BIRC5,BUB1,BUB1B,C4A/C4B,C5AR1,CCL18,CCNA2,CCNB1,CD8A,CDC20,CDCA5,CDK1,CDKN2B,CENPE,CHAF1B,CTLA4,CXCL10,CYP4F2,E2F7,EGR2,HDAC3,HGF,HJURP,ICAM1,IFITM3,IFNG,IFNLR1,IL16,IL2RA,IL6,ITGAX,KIF11,LAMP3,LY9,MCL1,MKI67,MMP9,NDST1,NR4A2,NUSAP1,OSM,PIM2,PLK1,PPARG,PRC1,REC8,REG3G,RIPOR2,SGK1,SKA3,SLAMF7,SMC2,SPC25,TARP,TGM2,TLR9,TNFRSF9,TOP2A,TPX2,UBD,UBE2C,UHRF1
aflatoxin B1		chemical - endogenous non-mammalian	Activated	5.947	2.27e-14	ADAM8,ASF1B,ASPM,BRCA2,BUB1,CCNA2,CDK1,CENPE,CENPF,CEP55,CFTR,CHAF1B,CYP3A4,DLGAP5,FAM83D,FANCD2,GTSE1,GULP1,HLA-DQA1,HMMR,IQGAP3,KIF11,KIF15,KIF20A,KIF23,KNL1,LPL,MELK,MYBL2,NDC80,NUSAP1,PCLAF,PLK1,PRC1,PTTG1,RBL1,SMC2,SPC25,TNFRSF9,TOP2A,TPX2,TTK,UBE2C
PTGER2		G-protein coupled receptor	Activated	4.548	4.26e-14	ASPM,BUB1B,CCNA2,CCNB2,CENPE,CENPF,CEP55,CXCL10,DEPDC1,ESRRA,IFNG,IL6,ITGAL,KIF11,KIF15,KIF20A,KLRD1,MELK,MKI67,MMP9,NUSAP1,PLK1,PRC1,SERPINE1,TPX2,TTK
KDM1A		enzyme	Activated	2.485	4.74e-13	ASF1B,ATP8B3,BARX2,BLM,BRCA2,BRIP1,C4A/C4B,CCNA2,CD274,CENPF,CHAF1B,CXCL10,CXCL9,DNAI3,DOCK2,FCGR3A/FCGR3B,GATA3,GBP4,GBP5,GPNMB,HLA-DQA1,IFITM3,IGFBP4,IKZF3,IL21R,ITGAX,KCNAB2,LAG3,LAMA3,LY9,MCM2,MCM4,MYBL2,NLRC5,OSM,PDPN,POU5F1,PTPRC,PTTG1,RBL1,SERPINE1,SERPINF2,SPOCK1,TAP1,TOX2,UHRF1,WWTR1
CASR		G-protein coupled receptor	Activated	2.811	1.19e-12	ABCC2,BIRC5,BMP7,BUB1B,CCNB1,CDC20,CDC45,CHAF1B,CLDN14,CXCL10,GATA3,GNAI2,IGFBP5,KIF11,LBH,LORICRIN,LPL,NEDD9,NUSAP1,PDLIM2,PPARG,PRC1,PTTG1,RAPGEF1,TGFB2,TK1,TPX2
LIN9		other	Activated	3.415	1.52e-12	BIRC5,BUB1,BUB1B,CCNA2,CCNB1,CDK1,CENPE,CEP55,DLGAP5,MYBL2,PLK1,UBE2C
ERBB2		kinase	Activated	3.436	1.16e-11	ADAM8,AGTR2,AKT2,ALAD,ANXA2,ASPM,BACE1,BIRC5,BMP7,BRIP1,BUB1,BUB1B,C5AR1,CBFA2T3,CCL18,CCNA2,CCNB1,CCNB2,CCR3,CD36,CD59,CDC20,CDC45,CDC7,CDCA5,CDCA7L,CDK1,CDKN2B,CENPE,CENPF,CHRM4,CXCL10,CXCR6,CYP4B1,DAG1,E2F3,E2F5,E2F7,FXYD3,GATA3,GINS1,GINS4,GLS,HMGA2,ICAM1,IFNG,IGFBP4,IGFBP5,IL6,KRT81,LTBP3,MCL1,MCM2,MCM4,MKI67,MMP9,MXI1,MYBL2,NDC80,NDST1,NEDD9,NPY1R,NRBP1,NUP210,ORC1,PER1,PLAC8,POLQ,PPARG,PRC…
miR-874-5p (miRNAs w/seed GGCCCCA)		mature microRNA	Activated	3.498	3.42e-11	A4GALT,AATK,ABTB1,ADAM8,ADCY6,AGER,AKT2,ALAD,ANXA8/ANXA8L1,APC2,AQP10,AQP3,ARHGEF25,ARRB1,ARSG,ASF1B,ASTN2,BACE1,BCAS3,BMF,BMP7,BMP8B,BRSK2,C14orf180,C1orf159,C6orf141,CACNA1I,CATIP,CBFA2T3,CCM2L,CCR3,CD5L,CDCA7L,CDK2AP2,CFTR,CHI3L1,CHIT1,CLUH,CPNE5,CRCP,CYP3A4,DDIT4,DNAJB2,DOHH,EFNA3,EPN1,EPS8L2,ERF,FADS6,FAM216B,FCAMR,FGD3,FGF22,FGFR3,FOXO4,GABARAPL1,GABRE,GGT7,GINS4,GNAI2,GTSE1,HS6ST3,ICAM1,IF…
Interferon alpha		group	Activated	3.711	4.11e-11	A4GALT,AIM2,ANXA2,AQP3,CCNA2,CCNB2,CCR3,CD274,CD8A,CDC20,CXCL10,CXCL11,CXCL9,CYP2C9,CYP3A4,DAG1,DDIT4,DOCK2,FCER1A,FILIP1L,GATA3,GBP5,GLS,GVINP1,HMMR,ICAM1,IFI27,IFI6,IFITM3,IFNG,IFNLR1,IGFBP4,IL21R,IL2RA,IL6,LAIR2,LAMP3,LTBP1,MCL1,MSR1,MYOF,NCR2,NUSAP1,OAS2,OAS3,PIM2,PRC1,PRF1,SGSM3,SLAMF7,STAT1,TAP1,TAP2,TGM2,TIGIT,WARS1,WWTR1
ZNF768	-1.234	other	Activated	2.137	4.19e-11	CCNB1,CCNB2,CDC20,CDC45,CDK1,ICAM1,IL6,MYBL2,NUSAP1,PLK1,SERPINE1,TOP2A
CKAP2L		other	Activated	4	5.28e-11	BIRC5,BUB1,CCNB1,CCNB2,CDC20,CDK1,CENPE,CENPF,KIF20A,KIF23,NDC80,PLK1,PTTG1,SGO2,SPC25,UBE2C
lipopolysaccharide		chemical drug	Activated	3.852	6.71e-11	ABCC2,AGER,AGTR2,AIF1,AIM2,ANK2,ANXA2,APOA1,APOC1,APOE,APOL6,AQP3,AZU1,BACE1,BANK1,BATF,BIRC5,BUB1,C5AR1,CBFA2T3,CCL18,CCNB1,CCNB2,CCR3,CD274,CD36,CD37,CD4,CD59,CD8A,CDC7,CDK1,CETP,CFTR,CHAF1B,CHI3L1,CR1L,CRIP3,CRTAM,CTLA4,CXCL10,CXCL11,CXCL9,CYP2C9,CYP3A4,CYP4A11,CYP4F2,DAG1,DDIT4,EGR2,ERF,FCGR3A/FCGR3B,FCRL5,GBP4,GBP5,GHRH,GLS,GPT,GTSE1,HDAC3,HGF,HLA-DOB,HLA-DQA1,ICAM1,IFI27,IFI6,IFITM3,IFNG,IG…
ESR1		ligand-dependent nuclear receptor	Activated	2.623	3.74e-10	ABCB9,ABHD2,ACOX1,AKT2,ANK3,APOA1,APOE,AQP3,ARRB1,ARSG,ASPM,AZU1,BACE1,BAZ2A,BCAS3,BIRC5,BRCA2,BUB1,BUB1B,CCNA2,CCNB1,CD59,CDK1,CDKN2B,CENPE,CENPF,CIT,CYP4A11,DDIT4,DNM2,DUSP10,ESRRA,FOXO4,GATA3,GULP1,HCP5,HMGA2,HOOK2,HSD17B3,ICAM1,IFI27,IFI6,IFITM3,IFNG,IGFBP4,IGFBP5,IL2RA,IL6,INSL3,JAK3,KCNMA1,KCTD13,KIF20A,KIF23,KNL1,KRT13,LORICRIN,LPL,LTBP1,MCF2L,MCL1,MCOLN1,MKI67,MMP9,NEDD9,NELL2,NR1D2,NUP21…
STAT1	1.17	transcription regulator	Activated	3.628	5.48e-10	ABCB9,APOA1,APOE,APOL6,BIRC5,C4A/C4B,CBFA2T3,CD274,CXCL10,CXCL11,CXCL9,CYP4A11,GATA3,GBP1P1,GBP4,GBP5,GLS,HAPLN3,HLA-DQA1,ICAM1,IFI27,IFI6,IFITM3,IFNG,IL6,ITGAX,LAMA1,LPL,MMP9,NLRC5,OAS2,OAS3,PPARG,PRF1,RORC,SAA2,SELL,SMAD2,STAT1,TAP1,TGFB2,TLR9,UBD,WARS1,XAF1
AREG		growth factor	Activated	3.889	6.18e-10	BIRC5,CCNA2,CCNB1,CCNB2,CDC20,CDC45,CENPF,HJURP,IFI6,IL6,IQGAP3,KIF14,KIF20A,MKI67,MMP9,MYBL2,PLK1,PRC1,TOP2A
pembrolizumab		biologic drug	Activated	2.168	7.55e-10	CCNB1,CD274,CD4,CD8A,CDK1,CTLA4,CXCL9,CXCR6,HLA-DQA1,LAG3,MKI67,PRF1,STAT1,TIGIT
FOXM1		transcription regulator	Activated	3.555	9.55e-10	ASPM,BIRC5,BRCA2,BRIP1,BUB1B,CCNA2,CCNB1,CCNB2,CDC20,CDK1,CENPB,CENPE,CENPF,GATA3,GTSE1,IL6,KIF20A,KIF23,MKI67,MMP9,PLK1,POU5F1,PRC1,PRR11,PTTG1,TOP2A
CEBPB		transcription regulator	Activated	2.274	1.27e-09	ASF1B,BIRC5,BRCA2,BUB1B,C2,CCNA2,CCNB2,CD274,CDC20,CDC45,CDK1,CDKN2B,CENPE,CFTR,CHIT1,CIT,CXCL10,CYP3A4,DEPDC1,DGAT2,DLGAP5,E2F3,FCGR3A/FCGR3B,GINS1,GINS4,HGF,HMMR,ICAM1,IFITM3,IFNG,IGFBP4,IGKC,IL6,ITGAL,KIF4A,MCM2,MCM4,MELK,MKI67,MSR1,MYBL2,PCK1,PLK1,PPARG,SAA1,SAA2,SERPINE1,SFTPA1,SGK1,SMAD2,SPC25,STAT1,TK1,TLR9,TOP2A,TUBB3
RABL6		other	Activated	4	1.93e-09	BUB1,BUB1B,CCNA2,CCNB1,CENPF,HMMR,KIF23,MCM2,MELK,NDC80,PLK1,PRC1,TOP2A,TPX2,TTK,UBE2C
MYBL2	1.209	transcription regulator	Activated	2.918	2.57e-09	BIRC5,BUB1,CCNA2,CCNB1,CCNB2,CDK1,CENPE,IFNG,IGFBP5,MYBL2,PLK1,SFTPA1,TOP2A,UBE2C
miR-6887-3p (miRNAs w/seed CCCCUCC)		mature microRNA	Activated	3.44	2.64e-09	ADCY6,AGER,AKT2,APOC1,APOL6,AQP10,AQP3,ARRB1,B4GALT6,BATF,BAZ2A,BMP7,CABIN1,CD6,CLSTN3,COL20A1,COL27A1,CTDSP1,DAG1,DDIT4,DIRAS2,DNAH10,DNAJB2,DOCK2,EPN1,EPS8L2,ERF,FADS6,FAM78A,FGF18,FGF22,FOXO4,FOXP4,FUZ,GABARAPL1,GATAD2B,GCSAM,GGT7,GNAI2,GPR42,GRAPL-AS1,GUCA2B,H3C14,HSD17B3,HTR3A,IL17RE,KCNAB2,KCNF1,KCNJ10,KCNK12,KCNK7,KIFC2,KRT13,LINGO3,LMBR1L,LMNB2,MAPRE3,MEX3D,MGAT5B,MIP,MMP25,MRPL20-AS1,NLR…
TNF		cytokine	Activated	4.9	4.37e-09	A4GALT,AATK,ABCC2,ACOX1,ADAM8,ADCY7,AGER,ALAD,ANK3,APOA1,APOE,AQP3,AURKC,AZU1,BACE1,BCKDHA,BIRC5,BIRC7,BUB1B,C1QTNF9,C2CD4A,C4A/C4B,C5AR1,CCL18,CCR3,CD274,CD36,CD4,CD59,CDKN2B-AS1,CFTR,CHI3L1,COL27A1,CRCP,CTLA4,CXCL10,CXCL11,CXCL9,DAG1,DDIT4,DUSP10,DVL1,EGR2,ELMO1,FAT2,FGF18,FOXO4,GATA3,GBP1P1,GBP4,GLS,GNAI2,GSDME,HGF,HMMR,ICAM1,IFI27,IFI6,IFITM3,IFNG,IGFBP4,IGFBP5,IGKC,IL16,IL21R,IL2RA,IL36A,IL3…
IFNA2		cytokine	Activated	2.881	4.98e-09	APOL6,BIRC5,CD274,CDKN2B,CXCL10,CXCL11,CXCL9,DNAJB2,GBP4,IFI27,IFI6,IFITM3,IFNG,IL2RA,IL6,LAMP3,MMP9,MT1M,MYH2,OAS2,OAS3,PTTG1,RBL1,REC8,RIPOR2,SH2D1A,STAT1,TAP1,TGM2,UBD,XAF1
H2AZ1		other	Activated	3.162	5.92e-09	APOA1,BIRC5,CDCA5,CEP55,DLGAP5,IGFBP5,MCM2,MKI67,MYBL2,PLK1,PPARG,SPC25,TOP2A,TPX2
CCND1		transcription regulator	Activated	3.499	6e-09	AQP3,ASPM,BIRC5,BRIP1,CCNA2,CD6,CDC45,CDCA7L,CDKN2B,CENPF,CEP55,COL20A1,COL27A1,DEPDC1,E2F7,FAM83D,HJURP,KIF11,KIF20A,KIF4A,KLHDC1,KNL1,MCM4,MELK,PBLD,PCLAF,PLK1,PPARG,PPCS,PTPRC,RBL1,RUFY3,SCT,SPC25,TPX2,UHRF1,UTRN
IRF1		transcription regulator	Activated	3.896	8.23e-09	ADAM8,AGTR2,APOL6,BRIP1,CCNB1,CD274,CFTR,CXCL10,CXCL11,CXCL9,E2F3,GBP4,IFI27,IFI6,IFITM3,IFNG,IL6,MMP9,OAS2,OAS3,POU5F1,SELL,STAT1,TAP1,TAP2,TLR9,UBD,XAF1
COPS5		transcription regulator	Activated	2.191	8.82e-09	ADCY6,BIRC5,BUB1,CCNA2,CDC20,CENPF,DBF4,DDIT4,DEPDC1,DLGAP5,EPS8L2,GINS1,GSDME,HMMR,IL6,KIF11,KIF15,KIF23,MCM2,MELK,MKI67,MYBL2,NDC80,PDE6G,SMC2,TK1,TOP2A,TPX2,TRAF4,TTK
Vegf		group	Activated	4.057	1.7e-08	BIRC5,BIRC7,BMP7,BUB1,BUB1B,CDC20,CDC45,CDK1,CENPF,CHI3L1,CXCL10,CXCL11,CYP4A11,DBF4,EGR2,HMMR,ICAM1,IFNG,IGFBP4,IL17RC,IL6,KIF11,KIF15,LRAT,LRP8,MCL1,MCM2,MELK,MKI67,MMP9,NDC80,NR4A2,NRROS,PIM2,PKMYT1,PLK1,POLR1G,PRC1,PRKCB,PTPN5,RGS20,SGK1,SMC2,TNFRSF9,TPX2,TTK,UBE2C,VASH1
TBX2		transcription regulator	Activated	3.86	1.72e-08	ASF1B,BUB1,CCNA2,CCNB1,CDCA5,CDK1,CHAF1B,E2F7,MCM2,MCM4,PKMYT1,PLK1,PRC1,RBL1,SMC2,TGFB2
IFNG	1.878	cytokine	Activated	4.24	1.77e-08	ADCY7,AGER,AIF1,AIM2,APOL6,BACE1,BATF,BMF,BRCA2,BRIP1,BUB1,BUB1B,C2,C4A/C4B,C5AR1,CARD17P,CCL18,CCNA2,CCR3,CD274,CD36,CD4,CD5L,CDC20,CDH22,CDK1,CDKN2B,CDKN2B-AS1,CFTR,CXCL10,CXCL11,CXCL9,CXCR6,CYP2C9,CYP3A4,E2F5,EGR2,FCGR3A/FCGR3B,GATA3,GBP4,GBP5,GLS,GNAI2,GPT,HCP5,HLA-DOB,HLA-DQA1,ICAM1,IFI27,IFI6,IFITM3,IFNG,IGFBP4,IGLC1,IL2RA,IL6,ITGAL,ITGAX,JAK3,KCNMA1,KIF23,KNL1,KRT13,LAG3,LAMP3,LPL,MCM4,MED…
IL12 (family)		group	Activated	2.768	2.27e-08	AQP3,CD274,CD4,CD8A,CXCR6,DDIT4,EGR2,FCGR3A/FCGR3B,GATA3,IFNG,IKZF3,IL2RA,IL6,KLRD1,LAIR2,PIM2,PRF1,PTPRC,RORC,SELL,SH2D1A,STAT1,TNFRSF9
miR-3070-5p (and other miRNAs w/seed GCCCCUG)		mature microRNA	Activated	2.13	3.97e-08	A4GALT,ACTL8,ADAMTSL4,ADCY6,ADRA1B,AGMO,AKT2,ANGPTL1,ANK3,APBA2,APC2,APOL6,AQP3,ARSG,BATF,BCAS3,BCKDHA,BMF,C14orf180,C2CD2,CALY,CCL18,CD4,CD6,CDH22,CDK2AP2,CFTR,CGREF1,COL20A1,CRCP,CSMD2,CTDSP1,DAG1,DIRAS2,DOHH,DOK3,ERF,F10,FADS6,FAM169A,FAM216B,FAM78A,FGD3,FOXO4,GABARAPL1,GGT7,GNAZ,GNL3L,GPR42,GRAPL-AS1,IFNG,IFNLR1,ITM2C,JAK3,KLKB1,LBH,LMBR1L,LOC102723701,LORICRIN,LRRC73,LRRC8E,MGAT5B,MIP,MRO,MR…
phytohemagglutinin		chemical drug	Activated	2.334	5.67e-08	ACOX1,AIF1,AKT2,CCL18,CD3D,CHAF1B,CTLA4,CXCL10,DNAJB2,ERF,FGFR3,GATA3,GGT1,ICAM1,IFNG,IKZF3,IL21R,IL2RA,IL6,JAK3,KIF23,KRT13,MCM4,MMP9,MT1E,PGA5 (includes others),PLK1,PRF1,PRKD1,PTPRC,SIRPG,STAT1,TFPI
VDR		transcription regulator	Activated	2.124	9.13e-08	ACOX1,AKT2,BMP7,BUB1B,CCNB1,CD36,CDC20,CDC45,CHAF1B,CXCL10,CYP2C9,CYP3A4,GATA3,GNAI2,ICAM1,IFNG,IGFBP5,IL6,KIF11,LBH,LPL,NEDD9,NUSAP1,PDLIM2,PPARG,PRC1,RAPGEF1,TGFB2,TK1,TPX2
miR-296-5p (miRNAs w/seed GGGCCCC)		mature microRNA	Activated	3.011	9.49e-08	ADRA1B,AGER,AKT2,ALAD,APBA2,APOL6,AQP10,ARRB1,AZU1,BMF,BRSK2,BTN2A2,C14orf180,C2orf88,CACNA1I,CATIP,CCL18,CD6,CD8A,CHIT1,CLK3,CLUH,CRACD,CRCP,CTDSP1,CXCL10,CYP4B1,DNAJB2,DNM2,DOCK2,DOHH,DOK3,ELFN1,ENSA,EPN1,FADS6,FGF22,FGFR3,FOXP4,GNAI2,GOLGA1,GPR42,GSDME,H3C14,HAPLN3,IFNLR1,IGFBP4,IGFBP5,ITM2C,KCNAB2,KCNC4,KCNQ2,KHSRP,KIFC2,KLHL30,LBX2,LGALS12,LIN28A,LMNB2,LRRC8E,LTBP3,MAGEA3/MAGEA6,MEX3D,MGAT5B…
HGF	1.552	growth factor	Activated	4.286	1.2e-07	ANK3,BIRC5,BUB1,BUB1B,CDC20,CDC45,CDK1,CDKN2B,CENPF,DBF4,HGF,HMMR,ICAM1,IFNG,IGFBP4,IGHMBP2,IL17RC,IL6,KIF11,KIF15,LRP8,MCL1,MCM2,MELK,MKI67,MMP9,NDC80,NR4A2,PCK1,PIM2,PKD1,PKMYT1,PLK1,POLR1G,PRC1,PTTG1,RGS20,SERPINE1,SGK1,SMC2,TAGLN2,TGFB2,TPX2,TTK,UBE2C
Immunoglobulin		complex	Activated	4.501	1.64e-07	ADAMTS2,ADCY6,ADRA1B,AGER,AIF1,AIM2,APOC1,APOE,BATF,BIRC5,BMP7,C17orf99,C5AR1,CBS/LOC102724560,CCL18,CCNA2,CD274,CD8A,CDK1,CHN2,CTLA4,CXCL10,CXCL11,CXCL9,DDIT4,DGAT2,EGR2,EPOP,FCGR3A/FCGR3B,GATA3,GBP5,GPNMB,HLA-DQA1,ICAM1,IFITM3,IFNG,IGFBP4,IL2RA,IL6,ITGAX,KLRD1,LAG3,LPL,LSP1,LTBP3,MCL1,MGST3,MICAL2,MKI67,MMP9,OAS2,OAS3,OSM,PCK1,PLAC8,POU5F1,PRF1,PRODH,PTPRC,RORC,SELL,SELP,SLC19A1,SLC30A2,SLC6A9,…
RELA		transcription regulator	Activated	2.822	1.81e-07	APOE,BACE1,BIRC5,BRCA2,CBS/LOC102724560,CD274,CD59,CFTR,CHI3L1,CXCL10,CXCL11,CXCL9,CYP2C9,CYP3A4,ELMO1,ICAM1,IFNG,IGKC,IL2RA,IL6,MMP9,NR4A2,OAS2,PCK1,PLK1,POU2AF1,POU5F1,PPARG,RASSF5,REG3G,RORC,SAA1,SAA2,SELP,SFTPA1,SMOC2,TAP1,TAP2,TFPI2,TGM2,TLR9,TUBB3,UBD
TNFRSF9	1.774	transmembrane receptor	Activated	2.142	2.04e-07	BIRC5,BLM,CCNA2,CDC45,CDC7,GINS1,IFNG,IL2RA,IL6,MCM2,MCM4,MMP9,PKMYT1,PRF1,PTPRC
IL2		cytokine	Activated	3.081	2.48e-07	ADAM8,BATF,BUB1,CACNG3,CCNA2,CCR3,CD274,CD3D,CD3G,CD59,CD8A,CDK1,CHN2,CTLA4,CXCL10,CXCR6,CYP2C9,DDIT4,FCGR3A/FCGR3B,FCMR,GATA3,HLA-DQA1,HLA-DQA2,ICAM1,IFI6,IFNG,IGFBP4,IKZF3,IL2RA,IL6,JAK3,KCNK1,KLRD1,LGALS12,LINC02446,LTBP3,MCL1,MKI67,MMP25,MMP9,NCR2,OSM,PIM2,PLAC8,PLK1,PPARG,PRF1,PTPRC,RNF157,RORC,SELL,SELP,SERPINE1,SIRPG,SLAMF7,TIGIT,TNFRSF12A,TNFRSF13C,TNFRSF9
AHR		ligand-dependent nuclear receptor	Activated	2.8	2.64e-07	A4GALT,ACOX1,ADAMTS2,AIF1,CCNA2,CCNB1,CD274,CD36,CD3D,CD3G,CD4,CD8A,CDK1,CDKN2B,CGREF1,CHI3L1,COL27A1,CXCL10,CXCL11,CYP3A4,EGR2,EMILIN2,FABP12,IFNG,IKZF3,IL21R,IL6,LAMA3,LTBP1,LTBP3,MMP25,NEDD9,PCK1,PLK1,POU5F1,PPARG,RBL1,REG3G,RORC,SAA1,SERPINE1,SLAMF6,TGFB2,TK1
EP400		other	Activated	2.804	2.81e-07	CCNA2,CDC20,CENPF,E2F7,IFNG,MCM4,MYBL2,PLK1,PPARG,RBL1,UHRF1
coxsackievirus A21		biologic drug	Activated	2.236	4.23e-07	CD274,CXCL10,CXCL11,CXCL9,LAG3
FOXO1		transcription regulator	Activated	2.84	5.25e-07	ALDOB,ASPM,BANK1,BIRC5,BRIP1,CCNA2,CCNB1,CCNB2,CD36,CDK1,CDKN2B,CENPF,CXCL10,DDIT4,DEPDC1,DLGAP5,EGR2,FGF18,FOXP4,GABARAPL1,ICAM1,IFNG,IL6,KIF11,KIF18A,LPL,LRAT,MMP9,MXI1,NUSAP1,PCK1,POU5F1,PPARG,PRC1,PRF1,PTPRC,RIPOR2,SELL,SERPINE1,SGK1,SPC25,TNFRSF9
miR-6795-3p (miRNAs w/seed CCCCUCG)		mature microRNA	Activated	2.793	6.25e-07	BATF,BMP7,C14orf180,CD274,CLNK,CLSTN3,COL27A1,DIRAS2,DNAJB2,DOHH,ENSA,EPS8L2,FADS6,FCGR3A/FCGR3B,FGF22,FOXO4,FOXP4,FUZ,GPR42,H3C14,ICAM1,KCNAB2,KIFC2,LBH,LMBR1L,LMNB2,MAPRE3,MEX3D,MGAT5B,MICAL2,MIP,MMP25,MRPL20-AS1,NDST1,NUTM2A/NUTM2B,NXPH3,PCSK9,PFDN6,PIM2,PKP1,PLEKHG7,POU5F1,PSMD3,PTPN5,RAPGEF1,RHOBTB2,SAMD4B,SCUBE1,SDR16C5,SEC16B,SLC30A2,SUN2,SYT11,TAGLN2,TEAD4,TET3,TIFAB,TMED9,TMEM198,TNFRSF1…
miR-3620-3p (and other miRNAs w/seed CACCCUG)		mature microRNA	Activated	2.22	6.34e-07	ABCD4,ADAMTS2,ADAMTSL4,APOC1,AQP10,AQP3,ARRB1,ASF1B,BANK1,BCKDHA,BTN2A2,C14orf180,CACNA1I,CBS/LOC102724560,CD8A,CDCA5,CDKN2B,CFTR,CRCP,DDIT4,DOHH,DUSP13,E2F3,FADS6,FAM78A,FANCD2,FGF22,FGFR3,FLVCR2,FMO5,FUZ,GALNT17,GDPD2,GINS4,GPR42,HDAC3,HSD17B3,IGFBP5,INHBE,KCNK1,KIFC2,LIN28A,LPL,MAPRE3,MED15,MEX3D,MICAL2,MRPL20-AS1,MYL4,NATD1,NEU4,NUTM2A/NUTM2B,OR51E1,PKD2L1,POU2AF1,PRRG3,PSAPL1,RASSF5,RETSAT,R…
E2F2		transcription regulator	Activated	2.236	6.43e-07	BIRC5,CCNA2,CCNB1,CCNB2,CDC45,CDK1,E2F3,IL6,MCM2,MCM4,MYBL2,ORC1,RBL1,SERPINE1
SLC15A4		transporter	Activated	3.897	7.03e-07	ANXA2,CCNA2,CCNB2,CD274,CDC20,CXCL10,DOCK2,FILIP1L,GBP4,GBP5,HMMR,IL6,MSR1,MYOF,NUSAP1,PRC1,SLAMF7,TAP2,TIGIT
TNFSF9		cytokine	Activated	2.772	7.49e-07	CD4,CD8A,ICAM1,IFNG,IL2RA,IL6,KLRD1,PTPRC
IL27		cytokine	Activated	2.351	7.81e-07	CD274,CTLA4,CXCL10,CXCL11,CXCL9,EGR2,GATA3,HLA-DOB,HLA-DQA1,ICAM1,IFNG,IFNLR1,IL2RA,IL6,LAG3,MCL1,RORC,STAT1,TAP1,UBD
E2F3	1.709	transcription regulator	Activated	3.212	1.03e-06	BIRC5,CCNA2,CCNB1,CCNB2,CDC45,CDK1,DAG1,E2F3,LPL,MCM2,MCM4,MT1H,MYBL2,ORC1,PCLAF,PLK1,PTTG1,RBL1,SERPINE1,TK1,TPX2,UBE2C
E2f		group	Activated	3.548	1.1e-06	CCNA2,CCNB1,CDC45,CDC7,CDK1,DBF4,FANCD2,MCM2,MCM4,MYBL2,NUSAP1,ORC1,PRR11,RBL1,SERPINE1,TPX2,TTK,UBE2C
CpG oligonucleotide		chemical drug	Activated	2.666	1.25e-06	BIRC5,BIRC7,C2,C5AR1,CCNB2,CD274,CD36,CXCL10,ICAM1,IFI27,IFI6,IFNG,IL2RA,IL6,ITGAX,MCL1,MSR1,OAS2,OAS3,POU2AF1,SERPINE1,TLR9
IL1B		cytokine	Activated	2.413	1.33e-06	A4GALT,ABCC2,ADAM8,AGER,AIF1,APOE,APOL6,BACE1,BMF,BMP7,C2,C4A/C4B,CCNA2,CD274,CD4,CDH22,CDK1,CDKN2B-AS1,CFTR,CHI3L1,CXCL10,CXCL11,CXCL9,CYP2C9,CYP3A4,DDIT4,E2F7,ESRRA,FGF18,FGFR3,GATA3,GBP4,GBP5,GGT1,HGF,HLA-DOB,ICAM1,IFITM3,IFNG,IGFBP4,IGFBP5,IKZF3,IL16,IL2RA,IL36A,IL37,IL6,KCNC4,KIF15,LAMA3,MCL1,MMP9,MT1E,MT1H,MT1M,NR4A2,NUP210,OAS2,OSM,PDPN,PPARG,PRF1,RORC,SAA1,SAA2,SCUBE1,SERPINE1,SERPINF2,SF…
S100A9		other	Activated	2.159	2.01e-06	BACE1,BMF,CCNB1,CD274,CTLA4,CXCL10,DDIT4,ICAM1,IFNG,IL6,KCNMA1,LTBP1,MCF2L,MMP9,MRO,PER1,PRODH,ROBO2,SCUBE1,SGK1,TNFRSF9
CD2		transmembrane receptor	Activated	2.754	3.2e-06	CCNA2,CCNB1,CD4,CD8A,ICAM1,IFNG,ITGAL,PTPRC,SELL,STAT1
CCL-34		chemical reagent	Activated	2.236	3.7e-06	CD4,CD8A,CXCL10,IFNG,ITGAX
IFNL1		cytokine	Activated	3.657	4.09e-06	APOL6,CXCL10,CXCL11,CXCL9,GBP5,IFI27,IFI6,IFITM3,IL6,LAMP3,OAS2,OAS3,STAT1,XAF1
E2F1		transcription regulator	Activated	2.457	4.38e-06	BIRC5,CCNA2,CCNB1,CCNB2,CD274,CDC20,CDC45,CDK1,DBF4,DUSP10,E2F3,EGR2,FANCD2,FGFR3,GINS1,ICAM1,IFNG,KIF23,LHX3,MCL1,MCM2,MCM4,MMP9,MYBL2,MYH2,NDC80,NUSAP1,ORC1,PCLAF,PPARG,PTTG1,RAD54L,RBL1,RHOBTB2,SERPINE1,SERPINF2,TAP1,TAP2,TK1,TOP2A,UHRF1,ULK2
4-nitroquinoline-1-oxide		chemical toxicant	Activated	2.186	4.4e-06	CCNA2,CCNB1,CCNB2,CD274,CDK1,DVL1,MKI67,MMP9
CD3E		transmembrane receptor	Activated	3.431	4.6e-06	BLM,CCNA2,CD3D,CD3G,CDC45,CDC7,CTLA4,GINS1,IFNG,IL2RA,IL6,MCM2,MCM4,MMP9,PKMYT1
Salmonella enterica serotype abortus equi lipopolysaccharide		chemical toxicant	Activated	2.852	5.65e-06	CCL18,CD274,CDK1,CDKN2B,E2F7,IL2RA,IL6,LAMP3,MCOLN2,NR4A2,PIM2,PLAC8,SFMBT2,SGPP2,SLAMF7,TARP,TFPI2,TNIP3,TPD52,UPB1
Ifnar		group	Activated	2.895	5.91e-06	AIM2,CD274,CD8A,CXCL10,FCER1A,IFITM3,IFNG,IL6,MMP9,NLRC5,OAS2,STAT1,TAP1,TAP2,XAF1
TGM2	1.357	enzyme	Activated	2.537	8.48e-06	C5AR1,CD36,CXCL10,CYP4F3,E2F5,HDAC3,IFI6,IFNG,IL6,ITGAX,LILRA5,LSP1,MMP9,OAS2,OAS3,PGA5 (includes others),RTKN2,SELL,SELP,SEMA7A,SLAMF7,STAT1,TAP1,XAF1
CSF1		cytokine	Activated	3.372	1.01e-05	APOE,BIRC5,C5AR1,CCNB1,CD36,CXCL10,CXCL11,CXCL9,EGR2,F10,FCGR3A/FCGR3B,GLS,GPNMB,GPT,IFNG,IL6,ITGAX,LAG3,LPL,MMP9,MSR1,OAS2,OAS3,PPARG,PTPRC,SLC16A3,STAT1,TLR9
TFEB		transcription regulator	Activated	2.978	1.01e-05	BUB1B,CCNB1,CCNB2,CDC45,CDC7,CTLA4,ESRRA,GINS1,HMMR,ICAM1,IFNG,IL6,KIF23,MAP1LC3A,MCM4,MCOLN1,MSR1,MYBL2,NUP210,ORC1,PDPN,PKMYT1,PPARG,PTTG1,SMC2,TOP2A,WDHD1,WDR45
IL21		cytokine	Activated	2.515	1.14e-05	BATF,CXCL10,GATA3,GBP5,IFNG,IL21R,IL2RA,IL6,KLRD1,MCL1,MKI67,MMP9,NCR2,OAS2,PRF1,PTPRC,RORC,SELL,SGK1,TAP1
miR-1913 (miRNAs w/seed CUGCCCC)		mature microRNA	Activated	2.012	1.22e-05	A4GALT,AATK,ADCY6,AKT2,ANO4,ARHGEF25,ARRB1,C17orf67,C1orf159,CCL18,CD6,CENPB,CGREF1,COL20A1,COL27A1,CSMD2,CTDSP1,DOHH,DSCR4,DUSP13,DVL1,ELFN1,FAM78A,FCMR,GNAZ,GPR42,H3C14,HASPIN,IL2RA,KCNAB2,KCNJ10,LBH,LMBR1L,MGAT5B,MICAL2,MMP24,MRPL20-AS1,MXI1,MYBL2,NEU4,NSMF,NYX,OTOP2,PCBP4,PHYHIP,PLEKHG7,PNOC,PNPLA5,POU5F1,PRB3,PRRG3,PTMS,PTPN5,RAB17,RAPGEF1,RHOBTB2,RIMS4,RNF166,RNF182,RNFT2,SAA2,SAMD4B,SCT,SC…
10E,12Z-octadecadienoic acid		chemical - endogenous mammalian	Activated	2.772	1.31e-05	ACOX1,ADAM8,BIRC5,BUB1,CD36,DGAT2,DLGAP5,EGR2,HMMR,IL6,LGALS12,NDC80,NR4A2,NXPH3,PPARG,RORC,TK1,TNIP3,VNN1
CXCL10	1.461	cytokine	Activated	2.586	1.37e-05	CD274,CXCL10,GPT,IFNG,IGKC,IL6,LAG3,MMP9
CHROMR		other	Activated	3.348	1.62e-05	APOL6,BUB1,CXCL10,CXCL11,DDIT4,GBP4,GBP5,IFI27,IFITM3,MCL1,NDC80,OAS2,OAS3,SERPINE1,SSBP3,STAT1,WARS1,XAF1
poly rI:rC-RNA		biologic drug	Activated	4.581	1.99e-05	APOL6,BIRC5,BUB1,C2,CCL18,CCNA2,CCNB2,CCR3,CD274,CD36,CDC20,CDK1,CENPE,CENPF,CXCL10,CXCL11,CXCL9,CYP4F2,DDIT4,GBP4,GBP5,GCSAM,ICAM1,IFI27,IFI6,IFITM3,IFNG,IL2RA,IL6,ITGAX,LPL,MCL1,MKI67,MMP9,MSR1,NDC80,NEDD9,NLRC5,NR4A2,OAS2,OAS3,POU2AF1,POU5F1,SERPINE1,SSBP3,STAT1,TAP1,TAP2,TFPI2,TNIP3,TOP2A,WARS1,WDFY4,XAF1
miR-6826-3p (miRNAs w/seed UCCCCUC)		mature microRNA	Activated	2.549	2.12e-05	ADCY6,ALAD,AQP10,BMP7,C1QTNF9,CD274,CGREF1,CLNK,CLSTN3,COL27A1,CTDSP1,DIRAS2,DNAJB2,ENSA,EPS8L2,FADS6,FAM78A,FCGR3A/FCGR3B,FOXO4,FUZ,GATAD2B,GPR42,H3C14,ICAM1,KCNAB2,KCNJ10,KCNK1,KIF12,KIFC2,LBH,LINGO3,LMBR1L,LMNB2,MICAL2,MIP,MRPL20-AS1,NLRC5,NR1D2,NUTM2A/NUTM2B,PCDHA5,PFDN6,PIM2,PKP1,PLEKHG7,POU5F1,PSMD3,PTPRN2,RHOBTB2,SAMD4B,SCUBE1,SDR16C5,SEC16B,SHISA7,SLAMF7,SLC26A9,SLC30A2,SYT11,TAF5L,TAGLN2…
MOG		other	Activated	2.182	3.25e-05	C5AR1,CD274,CTLA4,CXCL10,ICAM1,IFNG,IL6,ITGAL,MKI67,MMP9
miR-7108-3p (miRNAs w/seed CCCGCCC)		mature microRNA	Activated	3.046	4.07e-05	ABCB9,ABHD2,APC2,AQP10,ASF1B,BCAS3,BMP7,CA7,CATIP,CBS/LOC102724560,CCM2L,CD8A,CDH22,CLK3,CLSTN3,CLUH,CTDSP1,DNAJB2,DUSP13,EML2,FAM229A,GAN,GLTPD2,HMGA2,HOOK2,ITM2C,IZUMO4,KCNAB2,KCNK7,KIF12,KIFC2,LIN28A,LRAT,LRRC8E,MCOLN1,MEX3D,MICAL2,MMP25,MSR1,NRBP1,NXPH3,PKP1,POLR1A,PPP1R37,RAPGEF1,REEP1,RHOBTB2,RUNX3,SSBP3,TAF5L,TEF,TMEM231,TNFRSF12A,UNC5CL,USP49,VASH1,ZSWIM9
CD40		transmembrane receptor	Activated	2.291	4.09e-05	A4GALT,ATP6V1C2,BIRC5,CCL18,CCNA2,CD8A,CTLA4,CXCL10,GLS,ICAM1,IFNG,IL2RA,IL6,ITGAL,MCM4,MMP9,MRTO4,POU2AF1,PRF1,SELL,SERPINE1,SLAMF7,SLC19A1,TAP1,TAP2,TLR9,TNFRSF9,TRAF4
cytarabine		chemical drug	Activated	2.88	4.14e-05	CCNB1,CD274,CDK1,ICAM1,IL6,MCL1,POU5F1,PRF1,TGFB2,TNFRSF13C,TOP2A
SENP3		peptidase	Activated	3	4.39e-05	CD4,CD8A,CXCL10,IL2RA,OAS2,STAT1,TAP1,WARS1,XAF1
hydroxyurea		chemical drug	Activated	2.392	5.11e-05	CCNA2,CCNB1,CDC45,CDC7,CDK1,GATA3,HJURP,IFI6,IL6,LGALS12,MCM2,STAT1,TK1,UHRF1
IRF8		transcription regulator	Activated	2.036	5.39e-05	APOE,BANK1,CD37,CD4,CEBPE,CXCL10,CXCL9,EGR2,ICAM1,IFI6,IFNG,IL6,LSP1,MMP9,MSR1,OAS2,OAS3,STAT1,TK1,TLR9
IFN Beta		group	Activated	2.669	6.79e-05	ACAT1,C2,CD274,CD79A,CXCL10,CXCL11,CYP2C9,CYP3A4,DAG1,ICAM1,IFI27,IFI6,IFNG,IL6,MMP9,NELL2,OAS2,OAS3,SERPINE1,STAT1,TAP1,TLR9,XAF1
IFNL4		cytokine	Activated	2.211	7.28e-05	CXCL10,CXCL11,IFI6,OAS2,STAT1
cytokine		group	Activated	2.733	7.37e-05	AGTR2,BIRC5,BMF,C5AR1,CD4,ICAM1,IFNG,IL2RA,IL6,MADCAM1,MMP9,SAA1,SAA2,SELP,SERPINE1,SGK1,TGFB2
YAP1		transcription regulator	Activated	2.517	8.09e-05	ACAT1,ADCY7,BIRC5,CCNA2,CCNB1,CD274,CD36,CDC20,CDCA5,CDK1,CDKN2B,CIT,E2F7,EGR2,GINS1,ICAM1,IFI27,IFI6,IGFBP4,IL6,KIF23,LPL,MMP25,PIM2,PLK1,RPL31,SERPINE1,SGK1,SMAD2,STAT1,SYNE3,TEAD4,TGFB2,TK1,TOP2A,UACA,UHRF1,WDR45,WWTR1
CD3		complex	Activated	3.546	8.42e-05	AQP3,AZU1,BATF,BIRC5,C2,CCL18,CD274,CD4,CD8A,CDK1,CENPF,CTLA4,CXCL10,CXCR6,DOCK2,EGR2,GATA3,GLDC,ICAM1,IFNG,IGFBP5,IL16,IL21R,IL2RA,IL6,JAK3,LSP1,LTBP1,MSR1,MT1H,PKMYT1,PPARG,PRF1,PTPRC,RORC,SH2D2A,STAT1,TAF15,TFPI2,TGM2,TNFRSF9,TOP2A,XAF1,ZBTB32
PI3K (family)		group	Activated	2.08	8.44e-05	BIRC5,CD274,CDKN2B,CXCL10,CXCL11,CXCL9,DDIT4,FOXO4,IL6,MCL1,MMP9,PREX1,SERPINE1,TGM2
FAS		transmembrane receptor	Activated	2.03	9.51e-05	AGER,AKT2,ANXA2,BIRC5,CABIN1,CAST,CD59,CXCL10,CXCL11,CXCL9,DUSP10,EGR2,GNAI2,GPNMB,ICAM1,IFNG,IL16,IL6,LAMP3,MMP9,MYO5A,NR4A2,OSM,PDLIM7,PRKCB,PTPRN2,SELP,SERPINE1,TAGLN2,TGM3
IRF7		transcription regulator	Activated	3.406	0.000106	CTLA4,CXCL10,CXCL9,GBP4,GBP5,IFI6,IFITM3,IL6,ITGAX,LILRA5,MCL1,OAS2,OAS3,PLAC8,STAT1,TAP1,TAP2,XAF1
NFkB (complex)		complex	Activated	3.321	0.000133	AGER,APOE,BACE1,BATF,BIRC5,CCNB1,CCNB2,CD274,CD36,CDH22,CETP,CFTR,CGREF1,CXCL10,CXCL11,CXCL9,CYP3A4,E2F7,GATA3,ICAM1,IFNG,IGKC,IL2RA,IL6,ITGAL,LSP1,MCL1,MMP9,NUMBL,PIM2,PKP1,PLK1,PPARG,SAA1,SERPINE1,SFTPA1,SLC16A3,SLC22A4,TAP1,TAP2,TFPI2,TGM2,TNFRSF9,UBD
F2		peptidase	Activated	2.088	0.000137	CCNA2,CD36,CXCL10,E2F7,ICAM1,IGFBP4,IGFBP5,IL6,LBH,MMP9,MYBL2,NCF1,OSM,SELP,SERPINE1,SOX15,TAGLN2,TAP2,TFPI,TFPI2,TGFB2,TMED9,TNFRSF12A,TUBB3
IL7		cytokine	Activated	2.797	0.000141	CD274,CD3D,CD3G,CD8A,E2F3,GATA3,IFNG,IL2RA,IL6,JAK3,MCL1,MMP9,PIM2,RORC,SELL,TNFRSF9
EGFR		kinase	Activated	2.335	0.000141	A4GALT,ANXA8/ANXA8L1,BCKDHA,BIRC5,CCNA2,CD274,CDK1,CEP55,CHI3L1,CXCL10,DAG1,E2F3,FAM234A,HMGA2,ICAM1,IFNG,IGFBP4,IGFBP5,IL36A,IL6,LAMA3,LRP8,MCL1,MCOLN1,MMP9,MT1M,MXI1,MYBL2,NUP210,PDLIM7,PLK1,POLR1G,POU5F1,PRF1,RAI14,SEMA7A,SERPINE1,ST3GAL4,SUSD5,TGM2
BTK		kinase	Activated	2.626	0.000148	CD274,CXCL10,CXCL9,IFNG,IL21R,IL2RA,IL6,ITGAX,OAS2,OAS3,PSMD3,SELP,STAT1,TLR9
MITF		transcription regulator	Activated	2.424	0.000155	AMDHD2,APOE,BIRC7,CCNB1,CENPF,CEP55,GPNMB,KAZN,KIF20A,KIF4A,MCM2,MCM4,MYL4,PLK1,POLM,POU5F1,PRF1,SERPINE1,SIX3,SPC25,TPX2,UBE2C,XRCC3
ORMDL3		other	Activated	2.396	0.000158	ADAM8,CXCL10,CXCL11,MMP9,OAS2,OAS3
NONO		transcription regulator	Activated	3.382	0.000166	BRIP1,CLEC4F,CXCL10,CXCL11,CXCL9,GBP4,GBP5,IFI27,IFI6,OAS2,OAS3,SLAMF7,SP140,STAT1,XAF1
C1QA		other	Activated	2.611	0.000183	C4A/C4B,C5AR1,CD274,CXCL10,IFNG,IL6,SERPINE1
IL33		cytokine	Activated	2.982	0.000187	ACAT1,APOE,ARRB1,BATF,CCL18,CD36,CXCL10,DGAT2,DOCK2,EGR2,ELMO1,FER1L6,GATA3,ICAM1,IFNG,IKZF3,IL2RA,IL6,ITGAX,MMP9,MSR1,PIM2,PPARG,PTPRC,RAI14,RAPGEF1,REG3G,SERPINE1,TIFAB,TIGIT,TNFRSF9,VASH1
TLR7		transmembrane receptor	Activated	2.759	0.000216	BANK1,BFSP2,CCNB1,CD274,CD79A,CXCL10,CXCL9,FCMR,ICAM1,IFNG,IL21R,IL6,ITGAX,KCNMA1,MCOLN2,OAS2,OAS3,SPRED3,STAT1,TMEM154
TPH1		enzyme	Activated	3.286	0.000262	ASF1B,CTLA4,CXCR6,DLGAP5,FCMR,MAP4K1,PCLAF,PRC1,SHCBP1,SLAMF6,TIGIT
EBI3		cytokine	Activated	2.929	0.000284	CD274,HLA-DOB,HLA-DQA1,ICAM1,IFNG,LAG3,RORC,STAT1,TAP1
ZBTB10		transcription regulator	Activated	2.848	0.000322	ADAM8,BIRC5,CD274,CD8A,CXCL10,GBP4,GBP5,IFITM3,IL2RA,IL6,LPL,LY9,SEMA7A,SERPINE1,TIGIT,XAF1
IFNA1/IFNA13		cytokine	Activated	2.794	0.000324	CD274,CXCL10,CXCL11,CXCL9,IFI27,IFI6,IFNG,OAS2,STAT1
IRF3		transcription regulator	Activated	3.26	0.000367	ABCC2,CD274,CXCL10,GBP5,ICAM1,IFI27,IFI6,IFITM3,IFNG,IL6,LAG3,MMP9,NLRC5,OAS2,OAS3,PLAC8,PTMS,STAT1,TAP1
RNY3		other	Activated	2.449	0.000408	CXCL10,IFITM3,LAMP3,OAS2,OAS3,XAF1
miR-6801-3p (and other miRNAs w/seed CCCCUGC)		mature microRNA	Activated	2.357	0.000409	AATK,ABHD2,ACTL8,ADCY6,ADCY7,AQP3,ARHGEF25,ARRB1,BCKDHA,BMF,BMP8B,CALML3,CCM2L,CGREF1,CLDN14,CLK3,DDIT4,DOHH,EMILIN2,EPS8L2,ERF,FADS6,FCMR,FOXO4,GBP5,GPR42,GRAPL-AS1,HS6ST3,IL16,KCNAB2,KIF12,KIFC2,KLHL6,LIN28A,MEX3D,MMP25,MRO,MRPL20-AS1,NYX,PCBP4,POU5F1,PSMD3,PYCR1,RETSAT,RIMS4,RNF182,S100A14,SEC16B,SFXN3,SHC2,SLC30A2,SPSB4,SSBP3,ST3GAL4,TEAD4,TESMIN,TET3,TGM3,TIFAB,TMPRSS6,TNFRSF12A,TRAF4,TRPM3,…
FLT3LG		cytokine	Activated	2.574	0.000421	BIRC5,CD274,CD3D,CD3G,CD79A,ICAM1,IFNG,IL2RA,MCL1,PTPRC
Srgn		other	Activated	2.828	0.000431	CD3D,CD8A,FCMR,IFNG,IL21R,ITGAX,MMP9,POU2AF1
miR-4290 (miRNAs w/seed GCCCUCC)		mature microRNA	Activated	2.518	0.000447	ABCB9,ABHD2,AGER,AKT2,ALDOB,AQP10,ARHGEF25,BACE1,BMP7,C2CD2,CCM2L,CD5L,CDKN2B,CEBPE,CLK3,CRCP,DAG1,DIRAS2,FAM168A,FAM234A,FAT2,GSDME,HOOK2,IGHMBP2,ITM2C,IZUMO4,KCNAB2,KCNK12,LHX3,LRAT,LYPD5,NLRC5,NRBP1,NSMF,NUTM2A/NUTM2B,NXPH3,NYX,PCBP4,PDLIM7,PLEKHG7,PNPLA5,PRRG3,PTPN5,PYCR1,RIMS4,RUFY3,RUNX3,SCUBE1,SERPINF2,SH2D2A,SLAMF7,SLC23A1,SSBP3,ST3GAL4,SUSD5,SZRD1,TAF15,TAF5L,TAGLN2,TBC1D22B,TEDC2,TESMIN…
MYB		transcription regulator	Activated	2.965	0.000448	AURKC,BANK1,BIRC5,BMF,CCNB1,CD4,CDK1,CDKN2B,GATA3,ICAM1,IGFBP5,IL2RA,IL6,NEDD9,RBL1,TNFRSF13C,TNFRSF9
IL18		cytokine	Activated	2.062	0.000519	AQP3,CXCL10,CXCL11,CXCL9,DDIT4,FCGR3A/FCGR3B,ICAM1,IFNG,IL2RA,IL6,ITGAL,LAIR2,MMP9,NCR2,PRF1,SELL,SMAD2,TNFRSF9
MAVS		other	Activated	3.188	0.000551	CHIT1,CXCL10,CXCL11,ICAM1,IFI27,IFITM3,IFNG,IL6,JAK3,MAGEA12,OAS2,OAS3,POU5F1,STAT1
RIPK2		kinase	Activated	2.665	0.000593	ACOX1,CD36,CXCL10,DGAT2,GBP4,ICAM1,IFNG,IL6,MCOLN2,OAS2,OAS3,RALGDS,STAT1,XAF1
Tnf (family)		group	Activated	2.515	0.00062	BIRC5,CD274,CD4,CXCL10,CXCL11,CXCL9,CYP3A4,DUSP10,ICAM1,IFNG,IL6,MMP9,PPARG,SAA1,SELL,SERPINE1,TGM2,TNFRSF9
TNFSF14		cytokine	Activated	2.436	0.000637	ADAM8,CXCL10,CXCL11,ICAM1,IFNG,IL6,MMP9
diethylstilbestrol		chemical drug	Activated	2.193	0.000708	ADCY6,AGTR2,AQP3,CCNA2,CCNB2,CENPE,CENPF,ESRRA,GGT1,HOXA10,INSL3,IQGAP3,KIF11,KIF4A,KRT13,LSP1,MKI67,NUMBL,OSBP2,PTTG1,RESP18,SLC6A20,TOP2A,VNN1
STING1		other	Activated	3.517	0.000911	CHIT1,CXCL10,CXCL11,GBP4,GBP5,ICAM1,IFI27,IFITM3,IFNG,IL6,JAK3,KLRD1,OAS3,PTPRC
HSF1		transcription regulator	Activated	2.505	0.000921	AURKC,BMP7,BUB1B,CCNA2,CD274,CD36,CDK1,FOXP4,ICAM1,IGFBP4,IL6,KCNF1,LPL,MCL1,MCM2,MCM4,MSH3,POU5F1,PPARG,SGO2,XAF1
E. coli B5 lipopolysaccharide		chemical - endogenous non-mammalian	Activated	3.737	0.000967	APOA1,CCL18,CD274,CLDN14,CTLA4,CXCL10,CXCR6,DNAJB2,ICAM1,IFNG,IL16,IL21R,IL2RA,IL37,IL6,ITGAL,NCF1,SERPINE1,TEAD4,TGFB2,TGM2
IRF9		transcription regulator	Activated	2.375	0.00106	CD274,CXCL10,IFI27,IFITM3,IFNG,IL6,OAS2,OAS3,STAT1,XAF1
adavosertib		chemical drug	Activated	3.284	0.00119	CHIT1,CXCL10,CXCL11,ICAM1,IFI27,IL6,JAK3,MAGEA12,OAS3,SAA1,STAT1
miR-6998-5p (miRNAs w/seed UGGGCAG)		mature microRNA	Activated	2.425	0.00119	AIM2,AQP3,ARHGEF25,BACE1,BATF,BMP7,BRSK2,C2orf88,CABIN1,CALY,CCM2L,CD8A,CDK16,CEND1,CLEC4F,COL27A1,CSMD2,DNAJB2,EFNA3,ENSA,FAM234A,FGD3,GATAD2B,IGFBP4,IGFBP5,IL16,IQGAP3,KCNC4,KCNQ2,KLHL30,KNG1,KRTAP1-5,LGALS12,LRFN2,LRRC8E,LYPD6B,LYPD8,MAP1LC3A,MAPRE3,MROH1,NATD1,NDST1,NUMBL,OAS3,ODAPH,OSBP2,PALM3,PCBP4,PIM2,PRC1,PRODH,PRRG3,REXO1,RIMS4,SFXN3,SIX3,SLC28A1,SLC6A9,SPRED3,ST3GAL4,TBC1D22B,TESMIN,TE…
miR-615-5p (and other miRNAs w/seed GGGGUCC)		mature microRNA	Activated	2.223	0.00121	ACSBG2,ANXA2,APC2,ARRB1,ASTN2,BATF,BMF,C14orf180,C1orf159,CATSPERZ,CDH22,CIT,CLSTN3,CRCP,CTDSP1,CYP4F2,DOCK2,ENSA,EPN1,FAM168A,FAM78A,FCAMR,FOXP4,GALNT17,GATA3,GCSAM,GGT7,ICAM1,IGHMBP2,IQCA1,ITM2C,IZUMO4,KCNAB2,KHSRP,KLHL30,KRT13,KRT33B,LBX2,MADCAM1,MAPRE3,MCOLN1,MMP24,NUDT14,PDE6G,PKP1,PRF1,PTPRN2,PYCR1,RHBDL1,RIMS4,RORC,SEC16B,SFXN3,SGSM3,SIX3,SLC28A1,SPATA2L,SPRED3,SSBP3,SSX3,ST6GALNAC6,SYT8,T…
NC410		biologic drug	Activated	2.53	0.00141	ADAM8,CD274,CD36,CD3D,CXCL10,GBP5,MMP9,OSM,PRF1,STAT1,TGM2
IL5		cytokine	Activated	2.564	0.00144	ANXA2,CCR3,CD79A,CHST12,EGR2,GBP4,HMMR,ICAM1,IFNG,IL2RA,KCNAB2,MMP9,PKIB,PTPRC,PYCR1,RIPOR2,SGK1,SLC16A3,TARP,TNFRSF9,UPB1,ZBTB32
miR-3072 (and other miRNAs w/seed GCCCCCU)		mature microRNA	Activated	2.139	0.00172	A4GALT,AATK,ABHD2,ADCY6,APBA2,APOL6,AQP3,ARRB1,BMF,BMP7,BRSK2,C14orf180,C1orf159,CABIN1,CLK3,CLUH,COL27A1,CTDSP1,DOHH,DVL1,EPOP,ERF,ESRRA,FADS6,FAM78A,FGF22,GBP5,GNAI2,GNAZ,GPR42,HASPIN,HMGA2,HSD17B3,IGFBP4,IKZF3,JAK3,KHSRP,KIF12,LAMP3,LIN28A,LRRC73,MAPRE3,MEX3D,MGAT5B,MIP,MMP25,MRPL20-AS1,MYBL2,NDST1,NEU4,NLRC5,NR4A2,NSMF,OR51E1,OTOP2,P2RX5,PBLD,PCBP4,PCSK9,PDE6G,PER1,POU5F1,PRB3,PRRG3,PTMS,PTPN…
miR-702-3p (miRNAs w/seed GCCCACC)		mature microRNA	Activated	2.661	0.0018	AATK,ADAMTS2,ADCY6,ARRB1,ASPG,BMF,C14orf180,CA7,CBS/LOC102724560,CD6,CDK20,CHRM4,CRTAM,CSMD2,DNAJB2,DUSP13,EFNA3,EPS8L2,FXYD3,GDPD2,GNAZ,GPR174,HDDC3,IFNLR1,IGFBP4,INHBE,KCNAB2,KCNK10,LGALS12,NR4A2,NSMF,PCLAF,PDLIM2,PHF19,POLR1A,PPP1R37,REEP1,RHBDL1,SELP,SHC2,SYNE3,SYT11,TEF,TET3,TMBIM1,TMEM231,TMEM25,TRAF4,TRIM36,UBE2M,VASH1
IL1		group	Activated	3.41	0.00192	APOE,C2,CD59,CHI3L1,CXCL10,CXCL11,CXCL9,GGT1,GLS,HGF,ICAM1,IFNG,IL2RA,IL6,LRAT,MADCAM1,MMP9,PPARG,RORC,SAA1,SAA2,SELL,SELP,SERPINE1,TGM2
Nfat (family)		group	Activated	2.164	0.00193	CTLA4,EGR2,FGF18,ICAM1,IFNG,LAG3,LBH,SERPINE1,SMAD2,TGFB2,TUBB3
TASL		enzyme	Activated	2.236	0.00207	CD274,GBP4,GBP5,IL6,SLAMF7
Ifn		group	Activated	2.422	0.00225	CXCL10,CXCL11,CYP4A11,HGF,ICAM1,IFITM3,MMP9,OAS2,OAS3,SERPINE1,STAT1,TAP1
ELAVL1		other	Activated	3.236	0.0023	BATF,CENPE,GATA3,IFITM3,IFNG,IL6,KHSRP,KIF11,KIF18A,MYBL2,OAS2,PRC1,PTPRC,PTPRN2,REG3G,RORC,STAT1,TOP2A,WARS1
PRL		cytokine	Activated	3.363	0.00248	ANXA2,CCNB1,CXCL10,CXCL11,CXCL9,DVL1,FILIP1L,GPNMB,ICAM1,IFI6,IGFBP5,IL2RA,IL6,LAMP3,NEDD9,OAS2,OAS3,PDK2,PDPN,REC8,STAT1,TNFRSF12A,XAF1
miR-6734-3p (miRNAs w/seed CCUUCCC)		mature microRNA	Activated	2.689	0.00268	ACOX1,ALAD,ALDOB,AQP10,AQP3,AUNIP,BCAS3,C14orf180,CDK20,COL20A1,CRTAM,CTDSP1,ENSA,FAM133B,FAM216B,FCGR3A/FCGR3B,FILIP1L,FLVCR2,FOXO4,GINS1,GNGT1,HAPLN3,HS6ST3,IGFBP5,INHBE,IQCA1,JAK3,KLRD1,KNG1,LMBR1L,LRRC73,MMP9,PACSIN3,PDLIM2,PIM2,POU5F1,PRKCB,PRRG3,PSAPL1,PSMD3,RAB17,RETREG3,RETSAT,RHOBTB2,RIMS4,RNF157,RNFT2,SERPINF2,SGSM3,SHC2,SLC28A1,SOHLH2,SZRD1,TEF,TEX35,TMEM231,TNFRSF13C,TNRC18,UGT2B15,UP…
IFNA4		cytokine	Activated	2.376	0.00277	CD274,CXCL10,CXCL11,CXCL9,GBP5,IFNG,IL6
MEX3A		other	Activated	2.449	0.00307	ACOX1,APOA1,CD36,PCK1,PLK1,PPARG
APP		other	Activated	2.307	0.00313	AGER,AIF1,APBA2,APOE,BACE1,BMF,C4A/C4B,CALML3,CAST,CCNA2,CCNB1,CCNB2,CD59,CD5L,CDK1,CHRM4,CXCL10,DIRAS2,ENSA,FUZ,GBP4,HDAC3,HGF,ICAM1,IFNG,IGFBP5,IL6,ITGAL,KCNC4,KNG1,MMP24,MMP9,MSR1,MXI1,NCF1,NR4A2,NSMF,NXPE3,OSM,PACSIN1,PDK2,PLK1,POU2AF1,PPARG,PRKCB,PTPN5,PTPRC,RBL1,SERPINE1,TAGAP,THSD4,TLR9,TOP2A,TUBB3,XAF1
miR-339-3p (miRNAs w/seed GAGCGCC)		mature microRNA	Activated	2.558	0.00327	A4GALT,AZU1,BMP7,BRSK2,CDH23,CRCP,DAG1,DIRAS2,DVL1,ELMO1,FGF22,FLJ40288,GAN,IGHMBP2,KCNK12,KCNMA1,KCTD13,KHSRP,KLHL30,LBX2,LINGO3,MED15,MEX3D,MRPL20-AS1,NLRC5,PIM2,RETSAT,RIMBP3 (includes others),SEMA6C,SUN2,TAOK2,TEF,TIFAB,TMEM184B,UBE2C,UNC93A,UNCX,UPK3B,XKRX,ZSWIM9
miR-7058-5p (miRNAs w/seed AGAGGGG)		mature microRNA	Activated	2.065	0.00358	A4GALT,ABHD2,ANO3,APOL6,ARRB1,BACE1,BICD1,BIRC5,C14orf180,CACNG3,CBFA2T3,CD59,CD8A,CDCA5,CDK20,CRCP,CTDSP1,CYP4A11,DIRAS2,E2F7,EFNA3,ENSA,EPN1,FAM78A,FBXO44,FER1L6,FGF18,FMO5,FOXP4,FUZ,HDAC3,HTR3A,IGFBP5,ITM2C,KCNK1,KLHL30,KRT81,LIN28A,MCM2,MICAL2,NRBP1,NUMBL,NXPH3,OSM,PACSIN1,PDE6G,PER1,PHF19,PHYHIP,PSAPL1,PTPN5,REEP1,RGS20,RHOBTB2,RIMS4,RNFT2,S1PR4,SCAPER,SCUBE1,SELP,SERPINF2,SLC6A2,ST3GAL4,SYN…
miR-3162-3p (miRNAs w/seed CCCUACC)		mature microRNA	Activated	2.481	0.00381	ADCY6,ADI1,APOL5,AQP3,BAZ2A,CCL18,CHI3L1,COQ8B,DAG1,DOHH,EPB42,ERF,FADS6,FAM72C/FAM72D,FBXO44,GABARAPL1,GGT7,HS6ST3,KLHL30,KLHL6,LMBR1L,MCL1,NUTM2A/NUTM2B,NYX,PACSIN3,PRRG3,PTPN5,SPOCK1,STAT1,TMEM184B,TMEM198,UBE2M,UNC5CL,UTS2,XRCC3
laminaran		chemical drug	Activated	2.449	0.00397	CXCL10,IL2RA,MCOLN2,SGPP2,TNFRSF9,TNIP3
oxazolone		chemical reagent	Activated	2.207	0.00408	CXCL10,ICAM1,IFNG,IL6,SAA1
TRADD		other	Activated	2.2	0.00408	CXCL11,ICAM1,IL6,MMP9,UBD
pyridostatin		chemical reagent	Activated	2.795	0.00415	CXCL10,CXCL11,GBP4,IFI27,IFITM3,LAMP3,SELL,TAP1
MIF		cytokine	Activated	2.173	0.00426	CXCL10,CXCR6,DGAT2,HGF,ICAM1,IFNG,IL16,IL2RA,IL6,MMP9,OAS2,OAS3,RORC
5-O-mycolyl-beta-araf-(1->2)-5-O-mycolyl-alpha-araf-(1->1')-glycerol		chemical - endogenous non-mammalian	Activated	2.339	0.00449	CXCL10,CXCL11,CXCL9,EGR2,ICAM1,MMP9,NEU4,SLAMF7,TNIP3
Pro-inflammatory Cytokine		group	Activated	2.2	0.00454	ABCC2,APOE,CR1L,ICAM1,IL6,MMP9,SELP,UBD
olaparib		chemical drug	Activated	2.231	0.00475	BRCA2,CCNA2,CCNB1,CDK1,CXCL10
poly dA-dT		chemical reagent	Activated	2.204	0.00475	CXCL10,ICAM1,IFNG,IL6,STAT1
concanavalin a		chemical drug	Activated	2.336	0.00483	CTLA4,CXCL10,GATA3,GPT,ICAM1,IFNG,IL2RA,IL6,MCL1,MMP9,SAA1,STAT1
PRKD1	-1.198	kinase	Activated	2.271	0.00539	BIRC5,CXCL10,IFNG,IL2RA,IL6,LPL,MMP9,MYH2
miR-6769a-3p (miRNAs w/seed AGCCCCU)		mature microRNA	Activated	2.117	0.00574	ADCY6,AIF1,AQP3,BMF,C14orf180,CLASRP,ERF,F10,FAM78A,FUZ,HAPLN3,HDAC3,HDDC3,LBH,LOC102723701,NSMF,OR51E1,PDLIM2,PDZD3,PKP1,PPP1R37,RAD54L,RIMS4,RNF167,SUN2,TK1,UPB1
NAMPT		cytokine	Activated	2.22	0.00601	BIRC7,CCR3,CXCL10,IL16,IL6,MMP9,NELL2,NPY1R,TFPI,TGFB2
collagenase		group	Activated	2.219	0.00632	CXCL10,ICAM1,IL6,SAA1,SELP
miR-6982-3p (miRNAs w/seed GGCCCCU)		mature microRNA	Activated	2.546	0.00655	A4GALT,ADCY6,ARRB1,ARSG,BCAS3,C6orf141,CACNA1I,CDK2AP2,CHI3L1,CLUH,CNN2,DAG1,DNAJB2,DOHH,EFNA3,FAM216B,FGF22,FOXO4,GAN,GGT7,HS6ST3,LRAT,MAP1LC3A,MCL1,PCBP4,POLM,PPP1R37,PRRG3,PTTG1,RNFT2,SEC16B,SLC16A3,SLC19A1,SPATA2L,SPRED3,STAT1,SUN2,SYNE3,TAGLN2,TEF,TIFAB,TMED9,TMEM132A,TMEM184B,TMPRSS6,TSPAN18,TTC34,TUBB3,XKR5,ZNF319
CARD9		other	Activated	2.156	0.00722	C5AR1,CXCL10,IFNG,IL6,TLR9
N6AMT1		enzyme	Activated	2.534	0.00728	ASPM,BRCA2,CDCA7L,CENPF,CIT,GINS1,IFITM3,KIF12,KIF20A,MKI67,ORC1,SNX10,TMEM132A
TNFRSF1B		transmembrane receptor	Activated	2.004	0.00779	CTLA4,ICAM1,IFNG,IL2RA,IL6,MMP9,MSR1,SAA1,SELL,SERPINE1
RIGI		enzyme	Activated	3.364	0.00801	CD4,CHIT1,CXCL10,CXCL11,ICAM1,IFI27,IL6,JAK3,LTBP3,MAGEA12,OAS3,STAT1
NfkB-RelA		complex	Activated	2.166	0.00821	CXCL10,CXCL11,CXCL9,ICAM1,IL6
MYD88		other	Activated	3.262	0.00887	BATF,BLM,CD274,CDK1,CXCL10,FANCB,ICAM1,IFNG,IGFBP5,IL6,ITGAX,MCM2,MKI67,MMP9,MSH3,MSR1,PRF1,SAA1,SERPINE1,SH3BP2,SLC16A3,TNFRSF12A
dihydrotestosterone		chemical - endogenous mammalian	Activated	2.616	0.00998	APOE,ATP2A1,BMF,BMP7,BRIP1,BUB1B,C4A/C4B,CCNA2,CCNB1,CD36,CDC20,CHI3L1,CYP4A11,CYP4B1,DEPDC1,H3C12,IGFBP4,IGFBP5,IL6,INSL3,KALRN,LPL,LTBP1,MCM4,MMP9,MYOF,NCF1,PCK1,PER1,PPARG,SGK1,SLC25A16,TARP,TFPI,TGFB2,TGM2,UGT2B15
PRKCA		kinase	Activated	2.053	0.0103	CD36,CXCL10,ICAM1,IFNG,LPL,MMP9,PTPRN2,SELP,SERPINE1,SZRD1,TGFB2
enterotoxin B		biologic drug	Activated	2.557	0.0108	CTLA4,CXCL10,CXCR6,GPNMB,ICAM1,IFNG,IL2RA,IL6
cisplatin		chemical drug	Activated	2.1	0.0137	ABCC2,ACOX1,AGXT2,ANXA2,AQP3,ASTN2,BIRC5,BIRC7,C4A/C4B,CCNB1,CDK1,CDKN2B,CLIP4,CLSTN3,CXCL10,CXCL9,CYP3A4,DDIT4,E2F7,EPS8L2,GATAD2B,GGT1,GPNMB,HJURP,HSD17B3,ICAM1,IFI6,IFNG,IL6,MCL1,NCF1,PLK1,POU5F1,RHOBTB2,SAA1,SEMA7A,SERPINE1,SH2D1A,TAOK2,TAP1,TFPI,TNFRSF12A,TOP2A,TRPM6,UHRF1
OSM	-2.042	cytokine	Activated	2.827	0.0144	ANXA2,CHI3L1,CXCL10,CYP4F3,FMO5,GHRH,GPNMB,HGF,HTR3A,ICAM1,IFNG,IL6,ITGAL,LORICRIN,MMP9,NELL2,OSM,PDPN,PLLP,POU5F1,PPARG,SAA1,SELP,SERPINE1,SLC16A3,STAT1,SYNE1,TAP1,TAP2,TOP2A,TPX2,ZNF467
VEGFA		growth factor	Activated	2.28	0.0146	BATF,BIRC5,CD36,CTLA4,CXCL10,E2F3,ICAM1,IFNG,IGFBP4,IGFBP5,IL6,LAG3,MCL1,MKI67,MMP9,NR4A2,SERPINE1,TFPI2,TNFRSF9,VASH1
F2R		G-protein coupled receptor	Activated	2.137	0.0152	HMGA2,ICAM1,IL6,MMP9,SELP,TFPI,TFPI2,TGFB2,TGM2
IL1A		cytokine	Activated	2.461	0.0154	ABCC2,C4A/C4B,CD274,CXCL10,CYP3A4,ICAM1,IFNG,IGFBP5,IL2RA,IL6,MMP9,PPARG,SAA1,SAA2,SERPINE1,SFTPA1,TK1
SHH		peptidase	Activated	2.543	0.0166	ALAD,BMP7,CCNB1,HGF,IFNG,IGFBP5,IL2RA,IL6,LHX3,MCM2,PPARG,SERPINE1,TGFB2,TUBB3
miR-337-3p (and other miRNAs w/seed CAGCUCC)		mature microRNA	Activated	2.104	0.0191	ABHD2,AGXT2,APC2,ARRB1,ASPG,BARX2,BIRC5,C17orf67,C2orf88,CACNA1I,CD6,CD79A,CDCA5,CENPF,CLUH,COL20A1,COQ8B,CRCP,DDIT4,DNAJB2,EGR2,EVPLL,FAM216B,FAM234A,FGF22,GALNT17,GAN,GDPD2,GINS4,GLTPD2,GRAPL-AS1,HMMR,IKZF3,IL2RA,IZUMO4,KCNF1,KCNJ10,KLHL38,KRT33B,KRT81,LRRC8E,MICAL2,MRO,MTLN,NEDD9,NLRC5,PDZD3,PGA5 (includes others),POLM,POLR1G,PPP1R37,PREX1,PSAPL1,RAPGEF1,RAPH1,RETREG3,RIMS4,RNF157,RNF167,RNFT2…
MSB0011359C		biologic drug	Activated	2.646	0.0193	ADAM8,CD3D,CXCL10,GBP5,OSM,PRF1,TGM2
ICAM1	1.16	transmembrane receptor	Activated	2.19	0.0194	ICAM1,IFNG,IL2RA,IL6,ITGAL,MMP9
CpG ODN 1668		chemical reagent	Activated	2.167	0.021	CXCL10,ICAM1,IFNG,IL6,STAT1,TLR9
E. coli B4 lipopolysaccharide		chemical toxicant	Activated	3.722	0.0227	ADCY7,CD274,CXCL10,CXCL9,GBP4,GPNMB,HGF,ICAM1,IFITM3,IFNG,IL6,KLHL6,MCL1,NCF1,PTPRC,TAP1,TRPM3,UHRF1
IL17F		cytokine	Activated	2.15	0.0236	CXCL10,ICAM1,IFNG,IL6,LPL
miR-1906 (miRNAs w/seed GCAGCAG)		mature microRNA	Activated	3.394	0.0242	ACOX1,ADH4,ANK3,ASPG,BRSK2,C14orf180,CA7,CACNA1I,CAST,CD274,CDKN2B,CLIP4,CMTM7,DNAJB2,DOCK2,DOHH,ERC2,FADS6,FAM133B,FGF22,GABARAPL1,GAN,GATAD2B,GOLGA1,HOOK2,HS6ST3,ICAM1,IGHMBP2,IL16,IL17RC,IZUMO4,JAK3,KALRN,KHSRP,KRT73,LBX2,LHX3,LIN28A,LYPD6B,MROH1,NATD1,NRBP1,NSMF,NUTM2A/NUTM2B,P2RX5,PACSIN1,PACSIN3,PCBP4,PER1,PHF19,POLM,PPP6R2,PRRG3,RALGDS,RAPGEF1,RASSF5,RETREG3,S100A14,SEC16B,SPSB4,SUN2,SZRD1…
trinitrobenzenesulfonic acid		chemical reagent	Activated	2.242	0.0246	ABCC2,ADAM8,CXCL10,IFNG,IL6,MMP9,REG3G,TNFRSF12A
CpG ODN 1826		chemical reagent	Activated	2.187	0.0246	ADRA1B,CD274,CXCL10,IFNG,IL6,NCF1,OAS2,OAS3
miR-7072-5p (miRNAs w/seed AGGGGAG)		mature microRNA	Activated	2.598	0.0278	ABCB9,APOL6,CDK16,CENPB,CTDSP1,CXCL10,DIRAS2,EFNA3,ENSA,EPN1,FAM78A,FOXP4,FUZ,FXYD3,GALNT17,GNL3L,HDAC3,HLF,HTR3A,IL2RA,KALRN,KIFC2,KLHL30,MAP1LC3A,MCL1,MMP24,NRBP1,OC90,PACSIN1,PDE6G,PDK2,PKMYT1,PLLP,PTPN5,REEP1,SERPINF2,SPOCK1,TAF5L,TAGLN2,TBC1D22B,TEKT5,TMBIM1,TMEM198,TNIP3,TRIM62,TSPAN18,UCN3,UTRN
miR-1952 (miRNAs w/seed CUCCACC)		mature microRNA	Activated	2.137	0.0291	ABCB9,ANXA8/ANXA8L1,BFSP2,C1orf159,CAPZB,CD59,CDH22,DDIT4,DNAJB2,ELFN1,ENSA,FAT2,GALNT17,GOLGA1,IGFBP5,LAMP3,LBH,NXPH3,PCSK9,PIM2,PKP1,PNPLA3,PSAPL1,PYCR1,REEP1,RIMS4,SGK1,SLC22A4,SUN2,TEX35,TIFAB,TMED9,TMEM198,TRPV3,VASH1,ZNF768,ZSWIM9
miR-7658-5p (miRNAs w/seed GUGGGCG)		mature microRNA	Activated	2.03	0.0324	ABCD4,ACSBG2,AGER,AKT2,ANXA8/ANXA8L1,ARRB1,BRSK2,C2orf88,CDCA5,CEBPE,CRCP,CSMD2,DAG1,DIRAS2,DNAJB2,EFNA3,ERF,FAM216B,FAM234A,FMO5,HCN2,KCNAB2,KCNJ10,MMEL1,NSMF,NUMBL,PPCS,PRC1,RALGDS,RAPGEF1,RIPOR2,SLC5A10,SLCO5A1,SYNGR4,SZRD1,TOX2,UNC93A,USP49,XAF1,YBEY,ZNF467
aldesleukin		biologic drug	Activated	2.236	0.033	FCGR3A/FCGR3B,GNGT1,IGKC,STAT1,TAP1
miR-1966-5p (miRNAs w/seed AGGGAGC)		mature microRNA	Activated	2.292	0.0353	ABTB1,ALAD,AQP3,BCAS3,BFSP2,BIRC5,CD37,CD5L,CD79A,COQ8B,DIRAS2,EPN1,FAM234A,FGF22,FMO5,GGT7,HTR3A,IFITM3,IL17RE,KCNJ10,KLC3,KRT13,LIN28A,MAPRE3,NUMBL,NXPH3,OSM,OTOP2,PCSK9,PHYHIP,POLR1A,PRRG3,RAPGEF1,RUNX3,SEMA6C,SEMA7A,SERPINE1,SH2D2A,SIX3,SLC28A1,SPATA2L,SSBP3,TAP1,TBC1D22B,TEF,TGM3,THSD4,TIGIT,TMEM184B,TRIM62,TSPAN18,UCN3,VSIG10L,XAF1,ZIC4
SIX1		transcription regulator	Activated	2.828	0.0381	ATP2A1,CD36,GATA3,LSP1,MAPRE3,MYH2,MYL4,REEP1,SIX2
salmonella minnesota R595 lipopolysaccharides		chemical - endogenous non-mammalian	Activated	2.225	0.0381	CXCL10,CXCL9,HLA-DQA1,ICAM1,IFNG,IL6,MCM2,MKI67,SERPINE1
miR-7682-5p (miRNAs w/seed GGCACGA)		mature microRNA	Activated	2.041	0.0432	ASPG,BMF,CDH7,CHN2,EPB41L4A,ERC2,FAM168A,IFNLR1,IGFBP4,KCNAB2,LRP8,OSBP2,PHYHIP,POLM,PSAPL1,RNF157,SLC19A1,SLC5A12,SSBP3,SYNE3,TMEM154,UNC5CL,YBEY,ZIC4
N-acetylmuramyl-L-alanyl-D-isoglutamine		chemical - endogenous non-mammalian	Activated	2.137	0.0442	CXCL11,ICAM1,IL2RA,IL6,MMP9,MSR1
kainic acid		chemical toxicant	Activated	2.008	0.0492	APOE,BACE1,BIRC5,CIART,EGR2,FGFR3,IL6,KCNQ2,MMP9,NR4A2,PER1,PNOC
ELOVL3		enzyme	Activated	2.449	0.0497	ALAD,FADS6,GPNMB,MSR1,SLAMF7,VNN1
CD28		transmembrane receptor	Activated	2.683	0.0498	C2,CD274,CENPF,CTLA4,CXCR6,EGR2,GATA3,IFNG,IGFBP5,IL21R,IL2RA,IL6,ITGAL,LSP1,LTBP1,MSR1,RORC,SH2D2A,SLC16A3,TFPI2
Brd4		kinase	Activated	2.607	0.0499	CXCR6,GPR174,HGF,IL6,ITGAL,LIN28A,POU5F1,SELL
METTL3		enzyme	Activated	2.078	0.0545	ADAMTSL4,CD36,CGREF1,CPZ,CXCL10,DENND2C,ICAM1,IL6
Map3k7		kinase	Activated	2.183	0.0586	CXCL10,EGR2,IFNG,IL6,LORICRIN,MMP9
miR-7033-3p (miRNAs w/seed GCCUCCA)		mature microRNA	Activated	2.429	0.0587	AMDHD2,ARRB1,CAPZB,CD5L,CHAF1B,DAG1,DGAT2,DNAJB2,ENSA,FGD3,FGF22,GALNT14,GATAD2B,GGT1,KCNK1,LRAT,LRRC8E,LYPD6B,MAPRE3,MCF2L,MED15,MMP24,MMP9,MTLN,NCF1,P2RX5,PCLAF,PNPLA3,PRF1,SERPINF2,SFXN3,SIX2,SIX3,SLC23A1,SLC6A2,SMOC2,SNTG1,SPOCK1,ST3GAL4,SYNE3,SYT11,TAF5L,TBC1D22B,THSD4,TMEM184B,TMEM231,VASH1,YBEY,ZSWIM9
25-hydroxycholesterol		chemical reagent	Activated	2.183	0.0618	CETP,CYP4F2,FCER1A,IFNG,IL6,NR4A2
miR-6743-3p (miRNAs w/seed GCCGCUC)		mature microRNA	Activated	2.4	0.0633	BCAS3,CACNA1I,CBS/LOC102724560,CDCA5,CDKN2B,DNM2,ERC2,EVC,F10,FAM234A,GNAI2,IL17RE,KCNC4,MS4A10,OSM,PCBP4,RAPGEF1,RETSAT,RSPH9,SLC5A10,UNC93A
IFNB1		cytokine	Activated	3.035	0.0645	APOL6,CD274,CXCL10,CXCL11,CXCL9,GBP4,GBP5,IFI27,IFI6,IFNG,IL6,ITGAX,MMP9,OAS2,STAT1,TLR9,XAF1
NFkB (family)		group	Activated	2.363	0.0719	BIRC5,CXCL10,IFNG,IL6,LPL,MMP9
miR-103-3p (and other miRNAs w/seed GCAGCAU)		mature microRNA	Activated	2.19	0.0855	ABHD2,ACOX1,ACSBG2,ADH4,ALAD,ANO3,BACE1,BCKDHA,C2orf88,CCDC178,CD274,CD36,CENPF,CLASRP,CTDSP1,CXCR6,DNAJB2,DOHH,DVL1,ELMO1,ERC2,ESRRA,FAM133B,FAM216B,FGF18,FGF22,GCSAM,HGF,HMGA2,HORMAD2,ITM2C,KCNK1,KIF23,KLRD1,KRT222,LIN28A,LYPD6B,MCM4,MT1E,MT1M,NEDD9,NRBP1,NXPE3,OR51E1,P2RX5,PACSIN1,PDK2,PHF19,PNPLA7,PPP6R2,PSMD3,PVRIG,RAI14,RAPGEF1,RASSF5,REEP1,RETREG3,RNF157,ROR1,S100A14,SH2D2A,SHCBP1,SLAMF6,S…
MAP3K14		kinase	Activated	2.414	0.0868	ADAM8,GBP5,ICAM1,IL6,MMP9,SIX2
miR-7082-3p (miRNAs w/seed CCCCCCU)		mature microRNA	Activated	2.53	0.0889	ADRA1B,ANK3,ATP8B3,C17orf99,CACNA1I,CCM2L,CLSTN3,CSMD2,DDIT4,DNAH10,DNAJB2,DNM2,ERF,FADS6,FOXO4,FTCD,FUZ,GABARAPL1,GATA3,IKZF3,INPP5J,LBH,LRRC73,MAP1LC3A,MEX3D,PIM2,RIMS4,SEMA7A,SERPINE1,SIX3,SLC30A2,ST3GAL4,ST6GALNAC6,SYNE1,SYT11,TIFAB,TMEM25,TNFRSF12A,YBEY,ZNF768
BHLHE40		transcription regulator	Activated	2.449	0.107	BIRC5,CD274,IFNG,IL2RA,IL6,MSR1,PDPN,PER1,PLAC8,PTPRC,SELL,SLAMF6,SLAMF7,SLC16A3,STAT1,TGM2,TNFRSF9
IRF5		transcription regulator	Activated	2.367	0.112	CXCL10,CXCL11,IFITM3,IL6,OAS2,STAT1
miR-3939 (miRNAs w/seed ACGCGCA)		mature microRNA	Activated	2.121	0.126	APOL6,IGFBP4,IL17RE,KAZN,RAPGEF1,SCUBE1,TRPV3,UNCX
homocysteine		chemical - endogenous mammalian	Activated	2.412	0.131	ANXA2,APOA1,CXCL10,GGT1,IL6,LPL,SAA1
cholesterol		chemical - endogenous mammalian	Activated	2.16	0.132	ACAT1,APOE,CD5L,CETP,CXCL10,ICAM1,IL6,ITGAX,LPL,NR4A2,PCSK9,PPARG,SAA1
E. coli lipopolysaccharide		chemical - endogenous non-mammalian	Activated	2.187	0.15	CXCL10,ICAM1,IFNG,IL6,MMP9
TLR4		transmembrane receptor	Activated	2.75	0.165	AGER,BATF,CAST,CD274,CXCL10,E2F5,HLA-DQA1,ICAM1,IFITM3,IFNG,IL2RA,IL6,MCOLN2,MMP9,NR4A2,PDPN,PPARG,RBL1,SELP,STAT1
TICAM1		other	Activated	2.233	0.182	CXCL10,CXCL11,ICAM1,IFNG,IL6,MCM2,MKI67,SERPINE1
miR-1258-3p (miRNAs w/seed UAGGGAA)		mature microRNA	Activated	2.693	0.194	ADCY6,ADI1,ALDOB,BCAS3,BICD1,CACNA1I,CDH7,CHI3L1,CYP2C9,CYP4A11,DIRAS2,E2F5,FAM234A,GATA3,GATAD2B,HTR3A,IFNG,IGFBP4,KCNJ10,KCTD13,KRTAP1-5,MTLN,NR1D2,NUMBL,OSM,PDK2,PIM2,PRRG3,PSAPL1,PTPRN2,RNF182,SFXN3,SH2D1A,SLC23A1,SLC26A3,SPATA2L
miR-2276-5p (miRNAs w/seed CCCUCUG)		mature microRNA	Activated	2.294	0.197	C1QTNF9,C5AR1,CLDN14,DSCR4,EML2,FAM169A,FAT2,GCSAM,HLF,IGFBP4,IGHMBP2,ITM2C,PDZD3,RETREG3,RHOBTB2,RNF157,RNF167,RNFT2,S100A14,SLC25A16,SLC28A1,SPATA2L,SZRD1
miR-6793-3p (miRNAs w/seed CCCCAAC)		mature microRNA	Activated	2.887	0.258	AMDHD2,BEND4,C17orf67,C6orf141,CDK20,CEP55,DIRAS2,GABARAPL1,GABRE,LBH,NEU4,OR51E1,PKP1,PTPN5,RORC,RUFY3,S100A14,SDR16C5,SLC35G1,SZRD1,TEF,TFAP2E,TMED9,TMEM198,TRPM6,UNC5CL,ZC3HAV1L
Tlr		group	Activated	2.381	0.281	CXCL10,ICAM1,IFNG,IL6,RGS20,STAT1
CNTF		cytokine	Activated	2.333	0.291	C5AR1,EGR2,GPNMB,HGF,KCNMA1,MCL1,MSR1,SAA1,STAT1,TAP1
SPP1		cytokine	Activated	2.253	0.345	CCL18,CDC20,ICAM1,IFNG,IL6,MMP9,PPARG,SEMA6C,SERPINE1
miR-770-3p (miRNAs w/seed UGGGCCU)		mature microRNA	Activated	2.236	0.423	BRSK2,BTN2A2,C14orf180,C1orf159,C2orf88,CCDC178,CTDSP1,FGFR3,GLTPD2,GOLGA1,GSDME,IGFBP4,IGFBP5,KCNJ10,PHYHIP,SGPP2,ST3GAL4,UBE2M,ZNF467,ZNF768
miR-708-3p (miRNAs w/seed AACUAGA)		mature microRNA	Activated	2.067	0.423	ANGPTL1,C2orf88,CCNB1,CCNB2,CDKN2B,ENSA,FAM133B,GBP4,GINS1,HLF,IQCA1,KLHL6,MCL1,NSMF,PLAC8,PRR11,RNF182,SIX3,SLC26A3,SMIM17,SNTG1,TPD52,UBE2M,UNC5CL,UNC93A,USP42
miR-674-5p (and other miRNAs w/seed CACUGAG)		mature microRNA	Activated	2.646	1	CGREF1,CYP4B1,GARIN4,GLTPD2,KRT13,RAB17,TMED9
miR-5692c (and other miRNAs w/seed AUAAUAU)		mature microRNA	Activated	2.646	1	FGF18,HORMAD2,KRTAP1-5,NCR2,PLAC8,RALGDS,SETD9
miR-34b-3p (miRNAs w/seed AAUCACU)		mature microRNA	Activated	2.333	1	C1QTNF1-AS1,C2orf88,CHN2,GABARAPL1,GBP4,INHBE,PLLP,SERPINF2,SNTG1
miR-3592 (and other miRNAs w/seed AGUGUUG)		mature microRNA	Activated	2.333	1	ADSS1,ALDOB,CENPW,HS6ST3,LAMA3,LRAT,PPP1R37,TNFRSF12A,ZNF711
miR-6080 (miRNAs w/seed CUAGUGC)		mature microRNA	Activated	2.111	1	ADAMTS2,ANO5,CFTR,FLJ40288,MRO,PDLIM2,PPCS,RAI14,RNF157,SEMA7A,TMEM25
miR-8112 (miRNAs w/seed CUCCGCC)		mature microRNA	Activated	2.111	1	ASTN2,CDCA7L,CRCP,GALNT17,KCNK1,MXI1,RAB17,UNCX,UPB1,USHBP1,YBEY
miR-6884-3p (miRNAs w/seed CCAUCAC)		mature microRNA	Activated	2.065	1	ART5,BTN2A2,CA7,CACNG3,CRCP,DENND2C,FUZ,KLHL30,KLKB1,KRTAP1-5,MRPL20-AS1,MS4A10,PKIB,PLAC8,SNTG1,TGM6,TK1,WWTR1,XAF1
