# Supplementary material for: Gene Expression Profiling in Coeliac Disease Confirmed the Key Role of the Immune System and Revealed a Molecular Overlap with Non-Celiac Gluten Sensitivity
Source: Int J Mol Sci. 2023 Apr 24;24(9):7769. doi: 10.3390/ijms24097769 (PMC10178871; doi:10.3390/ijms24097769)
Supplement: Supplementary file 1 [file ijms-24-07769-s001.zip › Supplementary Table S6.xlsx]

## Sheet: Disease and Functions
Categories	Diseases or Functions Annotation	p-value	Predicted Activation State	Activation z-score	Molecules	# Molecules
Cell-mediated Immune Response,Cellular Development,Cellular Function and Maintenance,Cellular Growth and Proliferation,Embryonic Development,Hematological System Development and Function,Hematopoiesis,Lymphoid Tissue Structure and Development,Organ Development,Organismal Development,Tissue Development	T cell development	1.07e-06	Increased	3.507	ADCY7,AKT2,ARRB1,BATF,BIRC5,BLM,BTN2A2,C5AR1,CARMIL2,CD274,CD3D,CD3G,CD4,CD6,CD79A,CD8A,CR1L,CRTAM,CTLA4,CXCL10,DOCK2,DUSP10,EGR2,GATA3,GPR174,HLA-DQA1,ICAM1,IFNG,IGKC,IKZF3,IL21R,IL2RA,IL6,ITGAL,JAK3,KLRD1,LAMA3,LMBR1L,LTBP1,LY9,MCF2L,MCL1,MSR1,NR4A2,OSM,PCK1,POLM,POU2AF1,PPARG,PREX1,PRKD1,PTGER1,PTPRC,RBL1,RORC,RUNX3,SH2D1A,SH2D2A,SLAMF6,SMAD2,STAT1,TK1,TNFRSF9	63
Cellular Development,Cellular Growth and Proliferation,Embryonic Development,Hematological System Development and Function,Hematopoiesis,Lymphoid Tissue Structure and Development,Organ Development,Organismal Development,Tissue Development	Lymphopoiesis	1.24e-06	Increased	3.451	ADCY7,AKT2,ARRB1,BATF,BIRC5,BLM,BTN2A2,C5AR1,CARMIL2,CD274,CD36,CD3D,CD3G,CD4,CD6,CD79A,CD8A,CHAF1B,CMTM7,CR1L,CRTAM,CTLA4,CXCL10,DOCK2,DUSP10,EGR2,FCAMR,GATA3,GPR174,HLA-DQA1,ICAM1,IFNG,IGKC,IKZF3,IL21R,IL2RA,IL6,ITGAL,JAK3,KLHL6,KLRD1,LAMA3,LMBR1L,LSP1,LTBP1,LY9,MCF2L,MCL1,MSR1,NR4A2,OSM,PCK1,POLM,POU2AF1,PPARG,PREX1,PRF1,PRKD1,PTGER1,PTPRC,RASSF5,RBL1,RORC,RUNX3,SH2D1A,SH2D2A,SLAMF6,SLC19A1,SM…	75
Cardiovascular Disease,Organismal Injury and Abnormalities	Occlusion of artery	2.58e-06	Increased	3.433	ACAT1,ADRA1B,AGER,APOA1,APOC1,APOE,ASTN2,BIRC5,BMP7,CA7,CBS/LOC102724560,CD36,CD59,CDKN2B-AS1,CETP,CHI3L1,CSMD2,CXCL10,CXCR6,CYP2C9,DNM2,DUSP10,F10,GNAI2,HGF,ICAM1,IFNG,IL6,ITGAL,ITGAX,KALRN,LINC01019,LPL,LRP8,MCF2L,MICAL2,MKI67,MMP9,MSR1,NCF1,PCSK9,POU5F1,PPARG,PRKCB,PROC,PTGER1,RNF157,SAA1,SELL,SELP,SERPINE1,SLC6A2,STAT1,TFPI,TGFB2,TLR9,TNFRSF9,TUBB3,VNN1,WWTR1	60
Cardiovascular Disease,Organismal Injury and Abnormalities	Atherosclerosis	1.88e-06	Increased	3.429	ACAT1,AGER,APOA1,APOC1,APOE,ASTN2,BIRC5,BMP7,CA7,CBS/LOC102724560,CD36,CD59,CETP,CHI3L1,CSMD2,CXCL10,CXCR6,CYP2C9,DNM2,DUSP10,F10,GNAI2,HGF,ICAM1,IFNG,IL6,ITGAL,ITGAX,KALRN,LINC01019,LPL,LRP8,MCF2L,MICAL2,MKI67,MMP9,MSR1,NCF1,PCSK9,POU5F1,PPARG,PRKCB,PROC,RNF157,SAA1,SELL,SELP,SERPINE1,STAT1,TLR9,TNFRSF9,TUBB3,VNN1,WWTR1	54
Cellular Function and Maintenance	Lymphocyte homeostasis	3.53e-07	Increased	3.369	ADCY7,AKT2,ARRB1,BATF,BIRC5,BLM,BMF,BTN2A2,C5AR1,CARMIL2,CCNB2,CD274,CD3D,CD3G,CD4,CD6,CD79A,CD8A,CR1L,CRTAM,CTLA4,CXCL10,DOCK2,DUSP10,EGR2,GATA3,GPR174,HGF,HLA-DQA1,ICAM1,IFNG,IGKC,IKZF3,IL21R,IL2RA,IL6,ITGAL,JAK3,KLRD1,LAG3,LAMA3,LMBR1L,LTBP1,LY9,MCF2L,MCL1,MSR1,NR4A2,OSM,PCK1,POLM,POU2AF1,PPARG,PREX1,PRKD1,PTGER1,PTPRC,RBL1,RORC,RUNX3,SH2D1A,SH2D2A,SLAMF6,SMAD2,STAT1,TK1,TNFRSF13C,TNFRSF9	68
Cell-mediated Immune Response,Cellular Function and Maintenance,Hematological System Development and Function	T cell homeostasis	2.72e-07	Increased	3.357	ADCY7,AKT2,ARRB1,BATF,BIRC5,BLM,BMF,BTN2A2,C5AR1,CARMIL2,CCNB2,CD274,CD3D,CD3G,CD4,CD6,CD79A,CD8A,CR1L,CRTAM,CTLA4,CXCL10,DOCK2,DUSP10,EGR2,GATA3,GPR174,HLA-DQA1,ICAM1,IFNG,IGKC,IKZF3,IL21R,IL2RA,IL6,ITGAL,JAK3,KLRD1,LAG3,LAMA3,LMBR1L,LTBP1,LY9,MCF2L,MCL1,MSR1,NR4A2,OSM,PCK1,POLM,POU2AF1,PPARG,PREX1,PRKD1,PTGER1,PTPRC,RBL1,RORC,RUNX3,SH2D1A,SH2D2A,SLAMF6,SMAD2,STAT1,TK1,TNFRSF9	66
Cellular Movement	Homing of blood cells	6.23e-06	Increased	3.304	ADAM8,AGER,AIF1,APOA1,APOE,AZU1,BATF,C5AR1,CCL18,CCR3,CD37,CD4,CXCL10,CXCL11,CXCL9,DOCK2,ELMO1,GATA3,GNAI2,GNAZ,ICAM1,IFNG,IL16,IL17RC,IL6,ITGAL,JAK3,LSP1,MMP9,NEDD9,PNOC,PPARG,PREX1,PRKCB,PTPRC,RIPOR2,S100A14,SAA1,SCT,SELL,SELP,SERPINE1,SFTPA1,UTS2,WIPF1	45
Cellular Development,Cellular Growth and Proliferation,Hematological System Development and Function,Hematopoiesis,Lymphoid Tissue Structure and Development,Tissue Development	Hematopoiesis of mononuclear leukocytes	1.55e-06	Increased	3.239	ADCY7,AGER,AKT2,ARRB1,BATF,BIRC5,BLM,BTN2A2,C5AR1,CARMIL2,CD274,CD36,CD3D,CD3G,CD4,CD6,CD79A,CD8A,CHAF1B,CMTM7,CR1L,CRTAM,CTLA4,CXCL10,CXCL11,DOCK2,DUSP10,EGR2,FCAMR,GATA3,GPR174,HGF,HLA-DQA1,ICAM1,IFNG,IGKC,IKZF3,IL21R,IL2RA,IL6,ITGAL,JAK3,KLHL6,KLRD1,LAMA3,LMBR1L,LSP1,LTBP1,LY9,MCF2L,MCL1,MSR1,NR4A2,OSM,PCK1,POLM,POU2AF1,PPARG,PREX1,PRF1,PRKD1,PTGER1,PTPRC,RASSF5,RBL1,RORC,RUNX3,SH2D1A,SH2D2A,S…	78
Hematological System Development and Function,Humoral Immune Response,Lymphoid Tissue Structure and Development,Tissue Morphology	Quantity of B lymphocytes	2.88e-09	Increased	3.216	APOE,BANK1,BMF,C17orf99,C1orf159,CBFA2T3,CD274,CD36,CD6,CD79A,CDKN2B,CEBPE,DOCK2,EGR2,FCMR,GLS,HGF,HLA-DQA1,IFNG,IGKC,IKZF3,IL21R,IL6,ITGAL,JAK3,KLHL6,LY9,MGAT5B,MYBL2,NEDD9,NPY1R,PIM2,POLM,POU2AF1,PPARG,PRF1,PRKCB,PROC,PTPRC,RASSF5,RORC,SELP,SFTPA1,SH2D1A,SH3BP2,SHCBP1,SMAD2,STAT1,TET3,TLR9,TNFRSF13C,TNFRSF9,WDFY4,WIPF1	54
Cellular Development,Cellular Growth and Proliferation,Hematological System Development and Function,Hematopoiesis,Lymphoid Tissue Structure and Development,Tissue Development	Leukopoiesis	8.28e-08	Increased	3.171	ADCY7,AGER,AKT2,ARRB1,BATF,BIRC5,BLM,BMP7,BTN2A2,C5AR1,CARMIL2,CAST,CBFA2T3,CD274,CD36,CD3D,CD3G,CD4,CD6,CD79A,CD8A,CDKN2B,CEBPE,CHAF1B,CHI3L1,CMTM7,CR1L,CRTAM,CTLA4,CXCL10,CXCL11,DOCK2,DUSP10,EGR2,FCAMR,GATA3,GPR174,HDAC3,HGF,HLA-DQA1,HOXA10,ICAM1,IFNG,IGKC,IKZF3,IL21R,IL2RA,IL6,INSL3,ITGAL,JAK3,KLHL6,KLRD1,LAMA3,LMBR1L,LSP1,LTBP1,LY9,MCF2L,MCL1,MSR1,MYBL2,NR4A2,NRROS,OSM,PCK1,PLAC8,POLM,POU2AF1…	95
Inflammatory Response	Inflammatory response	2.12e-07	Increased	3.022	ADAM8,AGER,AGTR2,AIF1,ANXA2,APOA1,APOE,APOH,AZU1,C2CD4A,C4A/C4B,C5AR1,CCL18,CCR3,CD274,CD36,CD37,CD4,CEBPE,CFTR,CHI3L1,CR1L,CXCL10,CXCL11,CXCL9,CYP4F3,DOCK2,ELMO1,ESRRA,FANCD2,FCGR3A/FCGR3B,GATA3,GGT1,GNAI2,GNAZ,HGF,ICAM1,IFNG,IL16,IL17RC,IL2RA,IL36A,IL37,IL6,ITGAL,KLKB1,KNG1,LILRA5,LPL,LSP1,LTBP1,MCL1,MMP9,MSR1,NCF1,NEDD9,NPY1R,NR1D2,NR4A2,NRROS,NTS,OSM,PDK2,PNOC,PPARG,PREX1,PRF1,PRKCB,PROC,PTGE…	92
Cell-mediated Immune Response,Cellular Movement,Hematological System Development and Function,Immune Cell Trafficking	T cell migration	1.26e-07	Increased	2.92	ADAM8,AIF1,AIM2,APOE,AQP3,AZU1,BATF,CCL18,CCR3,CD274,CD4,CD6,CTLA4,CXCL10,CXCL11,CXCL9,DDIT4,DOCK2,EGR2,ELMO1,GATA3,GNAI2,HGF,ICAM1,IFNG,IL16,IL2RA,IL6,ITGAL,JAK3,LAG3,MAP4K1,MMP9,PCSK9,PRF1,RIPOR2,RORC,SAA1,SELL,SELP,STAT1,TGM2,TNFRSF9	43
Cellular Movement,Hematological System Development and Function,Immune Cell Trafficking	Migration of mononuclear leukocytes	9.14e-10	Increased	2.899	ADAM8,AGER,AIF1,AIM2,ANXA2,APOE,AQP3,AZU1,BATF,CCL18,CCR3,CD274,CD4,CD6,CD8A,CRTAM,CTLA4,CXCL10,CXCL11,CXCL9,DDIT4,DOCK2,EGR2,ELMO1,FCER1A,GATA3,GNAI2,HGF,ICAM1,IFITM3,IFNG,IL16,IL2RA,IL37,IL6,ITGAL,ITGAX,JAK3,LAG3,MADCAM1,MAP4K1,MMP9,OSM,PCSK9,PPARG,PRF1,PROC,RALGDS,RAPGEF1,RASSF5,RIPOR2,RORC,SAA1,SELL,SELP,SH2D1A,STAT1,TGM2,TLR9,TNFRSF9	60
Cell-To-Cell Signaling and Interaction,Hematological System Development and Function	Interaction of mononuclear leukocytes	2.81e-08	Increased	2.898	AGER,APOA1,CCR3,CD4,CD6,CTLA4,CXCL10,CXCL11,CXCL9,DOCK2,FCGR3A/FCGR3B,GNAI2,HGF,ICAM1,IFNG,IL6,ITGAL,ITGAX,JAK3,MAP4K1,NEDD9,OSM,PPARG,PROC,RALGDS,RAPGEF1,RASSF5,RIPOR2,SAA1,SELL,SELP,SH2D1A,ULBP3	33
Cardiovascular Disease,Organismal Injury and Abnormalities	Arteriosclerosis	1.28e-06	Increased	2.889	ACAT1,AGER,APOA1,APOC1,APOE,ASTN2,BIRC5,BMP7,CA7,CBS/LOC102724560,CD36,CD59,CETP,CHI3L1,CSMD2,CXCL10,CXCR6,CYP2C9,DNM2,DUSP10,F10,GNAI2,HGF,ICAM1,IFNG,IL6,ITGAL,ITGAX,KALRN,LINC01019,LPL,LRP8,MCF2L,MICAL2,MKI67,MMP9,MSR1,NCF1,PCSK9,POU5F1,PPARG,PRKCB,PROC,RNF157,SAA1,SELL,SELP,SERPINE1,STAT1,TK1,TLR9,TNFRSF9,TUBB3,VNN1,WWTR1	55
Cell-To-Cell Signaling and Interaction,Hematological System Development and Function	Interaction of T lymphocytes	1.28e-07	Increased	2.86	APOA1,CCR3,CD4,CD6,CTLA4,CXCL10,CXCL11,CXCL9,DOCK2,GNAI2,HGF,ICAM1,IFNG,ITGAL,JAK3,MAP4K1,PROC,RALGDS,RAPGEF1,RASSF5,RIPOR2,SAA1,SELL,SELP,SH2D1A	25
Cellular Movement	Migration of cells	1.93e-10	Increased	2.844	ABHD2,ADAM8,ADI1,AGER,AGTR2,AIF1,AIM2,AKT2,ANGPTL1,ANXA2,APOA1,APOC1,APOE,APOH,AQP3,ARRB1,ASPM,AZU1,B4GALT6,BARX2,BATF,BCAS3,BEST4,BIRC7,BLM,BMP7,BRCA2,C2,C4A/C4B,C5AR1,CALML3,CARMIL2,CAST,CBS/LOC102724560,CCL18,CCNA2,CCNB2,CCR3,CD274,CD36,CD37,CD4,CD5L,CD6,CD8A,CDCA7L,CDH23,CDK1,CDKN2B-AS1,CEBPE,CENPF,CFTR,CHI3L1,CHN2,CHRM4,CNN2,CRTAM,CTDSP1,CTLA4,CXCL10,CXCL11,CXCL9,DAG1,DBF4,DDIT4,DEPDC1,DIRAS…	227
Cellular Movement,Hematological System Development and Function,Immune Cell Trafficking	Cell movement of mononuclear leukocytes	1.3e-10	Increased	2.816	ADAM8,AGER,AIF1,AIM2,ANXA2,APOA1,APOE,AQP3,AZU1,BATF,CCL18,CCR3,CD274,CD4,CD6,CD8A,CFTR,CRTAM,CTLA4,CXCL10,CXCL11,CXCL9,DDIT4,DOCK2,EGR2,ELMO1,FCER1A,GATA3,GNAI2,GNAZ,HGF,ICAM1,IFITM3,IFNG,IL16,IL2RA,IL37,IL6,ITGAL,ITGAX,JAK3,KNG1,LAG3,MADCAM1,MAP4K1,MMP9,NEDD9,OSM,PBLD,PCSK9,POU2AF1,PPARG,PRF1,PRKCB,PROC,RALGDS,RAPGEF1,RASSF5,RIPOR2,RORC,S100A14,SAA1,SELL,SELP,SERPINE1,SH2D1A,STAT1,TGM2,TLR9,TNF…	72
Cellular Movement,Hematological System Development and Function,Immune Cell Trafficking	Lymphocyte migration	2.84e-09	Increased	2.81	ADAM8,AIF1,AIM2,APOE,AQP3,AZU1,BATF,CCL18,CCR3,CD274,CD4,CD6,CD8A,CRTAM,CTLA4,CXCL10,CXCL11,CXCL9,DDIT4,DOCK2,EGR2,ELMO1,FCER1A,GATA3,GNAI2,HGF,ICAM1,IFITM3,IFNG,IL16,IL2RA,IL37,IL6,ITGAL,JAK3,LAG3,MADCAM1,MAP4K1,MMP9,OSM,PCSK9,PRF1,PROC,RALGDS,RAPGEF1,RASSF5,RIPOR2,RORC,SAA1,SELL,SELP,SH2D1A,STAT1,TGM2,TLR9,TNFRSF9	56
Cellular Movement,Hematological System Development and Function,Immune Cell Trafficking	Cell movement of lymphocytes	1.31e-09	Increased	2.737	ADAM8,AIF1,AIM2,APOE,AQP3,AZU1,BATF,CCL18,CCR3,CD274,CD4,CD6,CD8A,CFTR,CRTAM,CTLA4,CXCL10,CXCL11,CXCL9,DDIT4,DOCK2,EGR2,ELMO1,FCER1A,GATA3,GNAI2,GNAZ,HGF,ICAM1,IFITM3,IFNG,IL16,IL2RA,IL37,IL6,ITGAL,JAK3,LAG3,MADCAM1,MAP4K1,MMP9,NEDD9,OSM,PCSK9,POU2AF1,PPARG,PRF1,PROC,RALGDS,RAPGEF1,RASSF5,RIPOR2,RORC,SAA1,SELL,SELP,SH2D1A,STAT1,TGM2,TLR9,TNFRSF9,WIPF1	62
Cellular Movement	Cell movement	1.65e-09	Increased	2.629	ABHD2,ADAM8,ADI1,AGER,AGTR2,AIF1,AIM2,AKT2,ANGPTL1,ANO5,ANXA2,APOA1,APOC1,APOE,APOH,AQP3,ARRB1,ASPM,AZU1,B4GALT6,BARX2,BATF,BCAS3,BEST4,BIRC7,BLM,BMP7,BRCA2,C2,C4A/C4B,C5AR1,CALML3,CARMIL2,CAST,CATSPERZ,CBS/LOC102724560,CCL18,CCNA2,CCNB2,CCR3,CD274,CD36,CD37,CD4,CD59,CD5L,CD6,CD8A,CDCA7L,CDH23,CDK1,CDKN2B-AS1,CEBPE,CENPF,CFTR,CHI3L1,CHN2,CHRM4,CNN2,CRTAM,CTDSP1,CTLA4,CXCL10,CXCL11,CXCL9,CXCR6,DAG…	241
Cell-To-Cell Signaling and Interaction,Hematological System Development and Function	Interaction of lymphocytes	1.5e-08	Increased	2.618	APOA1,CCR3,CD4,CD6,CTLA4,CXCL10,CXCL11,CXCL9,DOCK2,FCGR3A/FCGR3B,GNAI2,HGF,ICAM1,IFNG,IL6,ITGAL,JAK3,MAP4K1,NEDD9,OSM,PROC,RALGDS,RAPGEF1,RASSF5,RIPOR2,SAA1,SELL,SELP,SH2D1A,ULBP3	30
Cell-mediated Immune Response,Cellular Movement,Hematological System Development and Function,Immune Cell Trafficking	Cell movement of T lymphocytes	2.98e-07	Increased	2.604	AIM2,APOE,AQP3,AZU1,BATF,CCL18,CCR3,CD274,CD6,CTLA4,CXCL10,CXCL11,CXCL9,DDIT4,EGR2,ELMO1,GATA3,GNAI2,HGF,ICAM1,IFNG,IL16,IL2RA,IL6,ITGAL,JAK3,LAG3,MAP4K1,MMP9,PCSK9,PRF1,RIPOR2,RORC,SAA1,SELL,SELP,STAT1,TGM2,TNFRSF9	39
Cell-To-Cell Signaling and Interaction,Hematological System Development and Function	Binding of mononuclear leukocytes	1.63e-08	Increased	2.589	AGER,APOA1,CCR3,CD4,CD6,CTLA4,CXCL10,CXCL11,CXCL9,DOCK2,FCGR3A/FCGR3B,GNAI2,HGF,ICAM1,IFNG,IL6,ITGAL,ITGAX,JAK3,MAP4K1,NEDD9,OSM,PPARG,PROC,RALGDS,RAPGEF1,RASSF5,RIPOR2,SELL,SELP,SH2D1A,ULBP3	32
Cell-To-Cell Signaling and Interaction,Hematological System Development and Function	Binding of T lymphocytes	2.67e-07	Increased	2.517	APOA1,CCR3,CD6,CTLA4,CXCL10,CXCL11,CXCL9,DOCK2,GNAI2,HGF,ICAM1,IFNG,ITGAL,JAK3,MAP4K1,PROC,RALGDS,RAPGEF1,RASSF5,RIPOR2,SELL,SELP,SH2D1A	23
Cell-To-Cell Signaling and Interaction,Hematological System Development and Function,Immune Cell Trafficking	Adhesion of mononuclear leukocytes	1.47e-06	Increased	2.462	CXCL11,CXCL9,DOCK2,GNAI2,HGF,ICAM1,IFNG,IL6,ITGAL,ITGAX,JAK3,MAP4K1,NEDD9,OSM,PPARG,PROC,RALGDS,RAPGEF1,RASSF5,RIPOR2,SELL,SELP,SH2D1A	23
Cell-To-Cell Signaling and Interaction,Hematological System Development and Function	Interaction of leukocytes	9.92e-10	Increased	2.452	AGER,AKT2,APOA1,APOE,APOH,BMP7,CCR3,CD36,CD37,CD4,CD6,CTLA4,CXCL10,CXCL11,CXCL9,DOCK2,F10,FCGR3A/FCGR3B,GNAI2,HGF,ICAM1,IFNG,IL6,ITGAL,ITGAX,JAK3,KLKB1,KNG1,LSP1,MADCAM1,MAP4K1,MSR1,NEDD9,OSM,PER1,PPARG,PREX1,PROC,PTPRC,RALGDS,RAPGEF1,RASSF5,RIPOR2,SAA1,SELL,SELP,SERPINE1,SFTPA1,SH2D1A,ST3GAL4,STAT1,TGM2,TNFRSF9,ULBP3,UTRN	55
Cell-To-Cell Signaling and Interaction	Binding of lymphatic system cells	9.05e-09	Increased	2.409	ANXA2,APOA1,APOE,CCR3,CD6,CTLA4,CXCL10,CXCL11,CXCL9,DOCK2,FCGR3A/FCGR3B,GNAI2,HGF,ICAM1,IFNG,IL6,ITGAL,JAK3,MAP4K1,NEDD9,OSM,PROC,RALGDS,RAPGEF1,RASSF5,RIPOR2,SELL,SELP,SH2D1A,ULBP3	30
Cell-To-Cell Signaling and Interaction,Hematological System Development and Function	Binding of leukocytes	1.86e-09	Increased	2.317	AGER,AKT2,APOA1,APOE,APOH,BMP7,CCR3,CD36,CD37,CD4,CD6,CTLA4,CXCL10,CXCL11,CXCL9,DOCK2,F10,FCGR3A/FCGR3B,GNAI2,HGF,ICAM1,IFNG,IL6,ITGAL,ITGAX,JAK3,KLKB1,KNG1,LSP1,MADCAM1,MAP4K1,MSR1,NEDD9,OSM,PER1,PPARG,PREX1,PROC,PTPRC,RALGDS,RAPGEF1,RASSF5,RIPOR2,SELL,SELP,SERPINE1,SFTPA1,SH2D1A,ST3GAL4,STAT1,TGM2,TNFRSF9,ULBP3,UTRN	54
Cell Death and Survival	Cell viability	8.49e-09	Increased	2.304	AGER,AIM2,AKT2,ANGPTL1,ANXA2,APOA1,APOE,AQP3,ARRB1,BICC1,BIRC5,BIRC7,BLM,BMP7,BRCA2,BRIP1,BUB1,BUB1B,C1QTNF9,CCL18,CCNA2,CCNB1,CD274,CD4,CD59,CD79A,CDC7,CDK1,CDK20,CDKN2B-AS1,CHI3L1,CIT,CLK3,CR1L,CTLA4,CXCL10,CXCL11,CXCL9,CYP3A4,DNM2,DUSP10,DUSP13,DUSP5P1,DUX4,E2F3,EFNA3,EMILIN2,ESRRA,FANCB,FANCD2,FCER1A,FCGR3A/FCGR3B,FCMR,FGF18,FGFR3,FUS,GATA3,GATA3-AS1,GHRH,GLS,GPNMB,GPR174,HDAC3,HEATR1,HGF,HJU…	164
Cell-To-Cell Signaling and Interaction,Hematological System Development and Function	Binding of lymphocytes	2.35e-08	Increased	2.286	APOA1,CCR3,CD6,CTLA4,CXCL10,CXCL11,CXCL9,DOCK2,FCGR3A/FCGR3B,GNAI2,HGF,ICAM1,IFNG,IL6,ITGAL,JAK3,MAP4K1,NEDD9,OSM,PROC,RALGDS,RAPGEF1,RASSF5,RIPOR2,SELL,SELP,SH2D1A,ULBP3	28
Cell-To-Cell Signaling and Interaction,Hematological System Development and Function,Immune Cell Trafficking	Adhesion of immune cells	2.17e-09	Increased	2.264	AGER,AKT2,APOA1,APOE,APOH,BMP7,CCR3,CD36,CD37,CD4,CD6,CXCL10,CXCL11,CXCL9,DOCK2,F10,FCGR3A/FCGR3B,GNAI2,HGF,ICAM1,IFNG,IL6,ITGAL,ITGAX,JAK3,KLKB1,KNG1,LSP1,MADCAM1,MAP4K1,MSR1,NEDD9,OSM,PER1,PPARG,PREX1,PROC,PTPRC,RALGDS,RAPGEF1,RASSF5,RIPOR2,SELL,SELP,SERPINE1,SFTPA1,SH2D1A,STAT1,TGM2,TNFRSF9,UTRN	51
Cell-To-Cell Signaling and Interaction	Adhesion of lymphatic system cells	6.09e-08	Increased	2.26	ANXA2,APOE,CXCL11,CXCL9,DOCK2,GNAI2,HGF,ICAM1,IFNG,IL6,ITGAL,JAK3,MAP4K1,NEDD9,OSM,PROC,RALGDS,RAPGEF1,RASSF5,RIPOR2,SELL,SELP,SH2D1A	23
Cellular Movement,Immune Cell Trafficking	Leukocyte migration	5.24e-10	Increased	2.257	ADAM8,AGER,AIF1,AIM2,AKT2,ANXA2,APOA1,APOE,AQP3,ARRB1,AZU1,B4GALT6,BATF,BLM,C2,C4A/C4B,C5AR1,CAST,CCL18,CCR3,CD274,CD36,CD37,CD4,CD5L,CD6,CD8A,CEBPE,CFTR,CHI3L1,CNN2,CRTAM,CTLA4,CXCL10,CXCL11,CXCL9,DDIT4,DOCK2,EGR2,ELMO1,F10,FCER1A,FCGR3A/FCGR3B,GATA3,GNAI2,GNAZ,HGF,ICAM1,IFITM3,IFNG,IL16,IL17RC,IL17RE,IL21R,IL2RA,IL36A,IL37,IL6,ITGAL,ITGAX,JAK3,KNG1,LAG3,LSP1,MADCAM1,MAP4K1,MCOLN2,MMP9,MSR1,NCF1…	112
Organismal Injury and Abnormalities,Respiratory Disease	Damage of lung	2.3e-08	Increased	2.254	AGER,AGTR2,AIM2,AKT2,ANXA2,APOH,AZU1,C2,C4A/C4B,C5AR1,CD274,CD5L,CHRM4,CXCL10,CXCL9,DDIT4,F10,FCGR3A/FCGR3B,FGFR3,GABRE,HLA-DQA1,HTR3A,ICAM1,IFNG,IL21R,IL6,JAK3,MMP9,NCF1,POU2AF1,PPARG,RUNX3,SAA1,SELP,SEMA7A,SERPINE1,SFTPA1,SGK1,STAT1,TARP,TLR9	41
Cellular Assembly and Organization,DNA Replication, Recombination, and Repair	Chromosomal congression of chromosomes	5.07e-06	Increased	2.236	CENPE,KIF14,KIF18A,NDC80,PLK1,SGO2	6
Hematological System Development and Function,Lymphoid Tissue Structure and Development,Tissue Morphology	Quantity of CD4+ T-lymphocytes	3.61e-08	Increased	2.228	AIM2,APOE,BATF,BMF,BTN2A2,C1orf159,C5AR1,CD274,CD3D,CD4,CD79A,CRTAM,CTLA4,CXCL10,EGR2,HLA-DQA1,ICAM1,IFNG,IL21R,IL6,ITGAL,JAK3,KLKB1,LAG3,NPY1R,NUP210,PRF1,PRKCB,PROC,PTPRC,RORC,SAA1,SELL,SH2D1A,SHCBP1,SLAMF6,TLR9	37
Cell-mediated Immune Response,Cell-To-Cell Signaling and Interaction,Cellular Movement,Hematological System Development and Function,Immune Cell Trafficking	Adhesion of T lymphocytes	1.47e-06	Increased	2.226	CXCL11,CXCL9,DOCK2,GNAI2,HGF,ICAM1,IFNG,ITGAL,JAK3,MAP4K1,PROC,RALGDS,RAPGEF1,RASSF5,RIPOR2,SELL,SELP,SH2D1A	18
Cellular Movement,Hematological System Development and Function,Immune Cell Trafficking,Inflammatory Response	Cell movement of phagocytes	5.58e-07	Increased	2.214	ADAM8,AGER,AIF1,AIM2,AKT2,ANXA2,APOA1,APOE,ARRB1,AZU1,BLM,C2,C4A/C4B,C5AR1,CAST,CCR3,CD274,CD36,CD37,CD4,CEBPE,CFTR,CNN2,CXCL10,CXCL11,CXCL9,DDIT4,DOCK2,F10,GNAI2,HGF,ICAM1,IFNG,IL16,IL21R,IL2RA,IL36A,IL37,IL6,ITGAL,ITGAX,JAK3,LSP1,MMP9,NCF1,NDST1,OSM,PBLD,PDK2,PDPN,PNOC,PPARG,PREX1,PRKCB,PROC,RIPOR2,RUNX3,S100A14,S1PR4,SAA1,SCT,SELL,SELP,SERPINE1,SFTPA1,SGK1,SGPP2,ST3GAL4,STAT1,TLR9,TNFRSF9,UTS2	72
Cellular Movement,Hematological System Development and Function,Immune Cell Trafficking	Cell movement of leukocytes	2.03e-09	Increased	2.182	ADAM8,AGER,AIF1,AIM2,AKT2,ANXA2,APOA1,APOE,AQP3,ARRB1,AZU1,BATF,BLM,C2,C4A/C4B,C5AR1,CAST,CCL18,CCR3,CD274,CD36,CD37,CD4,CD6,CD8A,CEBPE,CFTR,CNN2,CRTAM,CTLA4,CXCL10,CXCL11,CXCL9,DDIT4,DOCK2,EGR2,ELMO1,F10,FCER1A,GATA3,GNAI2,GNAZ,HGF,ICAM1,IFITM3,IFNG,IL16,IL17RC,IL21R,IL2RA,IL36A,IL37,IL6,ITGAL,ITGAX,JAK3,KNG1,LAG3,LSP1,MADCAM1,MAP4K1,MMP9,MSR1,NCF1,NDST1,NEDD9,OSM,PBLD,PCSK9,PDK2,PDPN,PNOC,POU2A…	102
Inflammatory Response	Cell-mediated response	2.1e-06	Increased	2.18	APOA1,APOE,C5AR1,CD274,CD4,CD59,CD6,CD8A,CRTAM,CTLA4,CXCL10,GATA3,ICAM1,IFNG,IL17RE,IL6,KLRD1,LAG3,MMP25,NCF1,NR4A2,PRF1,S1PR4,SELL,SH2D1A,SLAMF6,TIGIT,TLR9,TNFRSF9	29
Cell-To-Cell Signaling and Interaction	Adhesion of blood cells	9.79e-10	Increased	2.178	AGER,AKT2,APOA1,APOE,APOH,BMP7,C4A/C4B,CCR3,CD36,CD37,CD4,CD6,CXCL10,CXCL11,CXCL9,DOCK2,F10,FCGR3A/FCGR3B,GNAI2,HGF,ICAM1,IFNG,IL6,ITGAL,ITGAX,JAK3,KLKB1,KNG1,LRP8,LSP1,MADCAM1,MAP4K1,MSR1,NEDD9,OSM,PER1,PPARG,PREX1,PROC,PTPRC,RALGDS,RAPGEF1,RASSF5,RIPOR2,SAA1,SELL,SELP,SERPINE1,SFTPA1,SH2D1A,STAT1,TGM2,TNFRSF9,UTRN	54
Cell Death and Survival,Organismal Injury and Abnormalities	Cell death of blood cells	4.48e-06	Increased	2.168	ACAT1,ADAM8,AGER,AIM2,AKT2,APOE,ARRB1,BIRC5,BLM,BMF,CABIN1,CAST,CCNB1,CD274,CD4,CD59,CD5L,CD6,CD79A,CDK1,CFTR,CHI3L1,CTLA4,CXCL10,DDIT4,FCER1A,FCGR3A/FCGR3B,FCMR,FUS,GATA3,GGT1,GLS,GPR174,HGF,ICAM1,IFNG,IKZF3,IL21R,IL2RA,IL37,IL6,ITGAL,JAK3,LAG3,LMBR1L,LY9,MAP4K1,MCF2L,MCL1,MSR1,MYBL2,OSM,PCLAF,PIM2,POU2AF1,PPARG,PRF1,PRKCB,PTGER1,PTPRC,RORC,SH2D1A,SH2D2A,SH3BP2,STAT1,TET3,TGFB2,TGM2,TLR9,TNFRSF1…	74
Organismal Injury and Abnormalities	Growth of lesion	1.58e-08	Increased	2.16	ACAT1,AGER,AGTR2,AIM2,AKT2,ANK2,ANXA2,APOA1,APOE,BEST4,BIRC5,BMP7,BRCA2,BTN2A2,BUB1B,C5AR1,CCL18,CD274,CD36,CD59,CDHR5,CDK1,CDKN2B,CHI3L1,CLK3,CTLA4,CXCL11,CXCL9,DEPDC1,DIRAS2,DLGAP1-AS2,DNM2,DOCK2,DUSP5P1,ENSA,FBXO44,FCGR3A/FCGR3B,FGD3,FGF18,FGFR3,GATA3,GGT1,GLDC,GLS,GPNMB,GSDME,HDAC3,HGF,HIF1A-AS3,HJURP,HMGA2,HMMR,HOXA-AS2,ICAM1,IFITM3,IFNG,IGFBP5,IL16,IL6,KIF20A,LAG3,LAMA1,LAMA3,LGALS12,LIN28A…	130
Cellular Assembly and Organization,DNA Replication, Recombination, and Repair	Alignment of chromosomes	4.87e-06	Increased	2.158	BIRC5,CCNA2,CENPE,DLGAP5,GTSE1,KIF14,KIF18A,KIF20A,TTK	9
Cell-To-Cell Signaling and Interaction,Hematological System Development and Function,Immune Cell Trafficking	Adhesion of lymphocytes	4.92e-07	Increased	2.119	CXCL11,CXCL9,DOCK2,GNAI2,HGF,ICAM1,IFNG,IL6,ITGAL,JAK3,MAP4K1,NEDD9,OSM,PROC,RALGDS,RAPGEF1,RASSF5,RIPOR2,SELL,SELP,SH2D1A	21
Cell Death and Survival,Organismal Injury and Abnormalities	Cell death of immune cells	2.7e-06	Increased	2.101	ACAT1,ADAM8,AGER,AIM2,AKT2,APOE,ARRB1,BIRC5,BLM,BMF,CABIN1,CAST,CCNB1,CD274,CD4,CD59,CD5L,CD6,CD79A,CDK1,CFTR,CHI3L1,CTLA4,CXCL10,DDIT4,FCER1A,FCGR3A/FCGR3B,FCMR,FUS,GATA3,GGT1,GLS,GPR174,HGF,ICAM1,IFNG,IKZF3,IL21R,IL2RA,IL37,IL6,ITGAL,JAK3,LAG3,LMBR1L,LY9,MAP4K1,MCF2L,MCL1,MSR1,MYBL2,PIM2,POU2AF1,PPARG,PRF1,PRKCB,PTGER1,PTPRC,RORC,SH2D1A,SH2D2A,SH3BP2,STAT1,TGFB2,TGM2,TLR9,TNFRSF13C,TNFRSF9,TOP2…	71
Cell-To-Cell Signaling and Interaction	Binding of myeloid cells	2.16e-06	Increased	2.1	AGER,AKT2,APOA1,APOE,APOH,C4A/C4B,CCR3,CD36,CD37,CD4,CXCL10,F10,FCGR3A/FCGR3B,ICAM1,IFNG,IL6,ITGAL,ITGAX,KNG1,LSP1,MADCAM1,MSR1,PPARG,PREX1,PROC,PTPRC,SELL,SELP,SERPINE1,SFTPA1,STAT1	31
Cancer,Organismal Injury and Abnormalities	Melanoma	3.49e-28	Increased	2.092	A4GALT,AATK,ABCB9,ABCC2,ABCD4,ABTB1,ACSBG2,ACTL6B,ACTL8,ACTRT2,ADAM8,ADAMTS2,ADAMTSL4,ADAMTSL5,ADCY6,ADCY7,ADH4,ADI1,ADRA1B,AGMO,AGTR2,AGXT2,AKAP14,ALAD,ALDOB,AMDHD2,ANGPTL1,ANK2,ANK3,ANO3,ANO4,ANO5,ANXA2,ANXA8/ANXA8L1,APBA2,APC2,APOA1,APOE,APOH,APOL5,APOL6,AQP10,AQP3,ARHGEF25,ARMCX5-GPRASP2/GPRASP2,ARRB1,ARSF,ARSG,ASPHD2,ASPM,ASTN2,ATP2A1,ATP6V1C2,ATP8B3,AZU1,B4GALT6,BANK1,BARX2,BATF,BAZ2A,BCAS3…	673
Cancer,Organismal Injury and Abnormalities	Growth of tumor	2.54e-08	Increased	2.089	ACAT1,AGER,AGTR2,AIM2,AKT2,ANK2,ANXA2,APOA1,BEST4,BIRC5,BMP7,BRCA2,BTN2A2,BUB1B,C5AR1,CCL18,CD274,CD36,CD59,CDHR5,CDK1,CDKN2B,CHI3L1,CLK3,CTLA4,CXCL11,CXCL9,DEPDC1,DIRAS2,DLGAP1-AS2,DNM2,DOCK2,DUSP5P1,ENSA,FBXO44,FCGR3A/FCGR3B,FGD3,FGF18,FGFR3,GATA3,GGT1,GLDC,GLS,GPNMB,GSDME,HDAC3,HGF,HIF1A-AS3,HJURP,HMGA2,HMMR,HOXA-AS2,ICAM1,IFITM3,IFNG,IGFBP5,IL16,IL6,KIF20A,LAG3,LAMA1,LAMA3,LGALS12,LIN28A,LINC…	129
Lymphoid Tissue Structure and Development,Tissue Morphology	Quantity of lymph follicle	3.04e-07	Increased	2.083	APOE,BANK1,BMF,C17orf99,C4A/C4B,C5AR1,CD274,CD37,DOCK2,EGR2,FCAMR,FCMR,GNAI2,IKZF3,IL6,KLHL6,NEDD9,NPY1R,POU2AF1,PROC,SH2D1A,SH3BP2,STAT1,TET3,TNFRSF13C,WDFY4,WIPF1	27
Cardiovascular System Development and Function,Cell-To-Cell Signaling and Interaction	Binding of endothelial cells	5.47e-06	Increased	2.074	AGER,AKT2,ANGPTL1,ANXA2,CCR3,CD274,CD36,CD37,CTLA4,CXCL11,F10,GATA3,HGF,ICAM1,IFNG,IL6,ITGAL,KNG1,MADCAM1,NDST1,PPARG,PROC,SELL,SELP,SERPINE1,STAT1,WWTR1	27
Cell Death and Survival	Cell viability of blood cells	8.54e-07	Increased	2.04	AGER,AIM2,AKT2,ARRB1,BIRC5,BLM,CD79A,CR1L,CTLA4,FCER1A,FCGR3A/FCGR3B,FCMR,GATA3,GPR174,HGF,ICAM1,IFNG,IL21R,IL6,ITGAL,JAK3,LY9,MCF2L,MCL1,MSR1,MYBL2,PIM2,POU2AF1,PRKCB,PTPRC,RORC,STAT1,TGM2,TLR9,TMPRSS6,TNFRSF13C,TNFRSF9,WIPF1	38
Cell-To-Cell Signaling and Interaction,Inflammatory Response	Immune response of leukocytes	7.19e-08	Increased	2.028	AGER,APOA1,APOE,C5AR1,CD274,CD36,CD59,CD5L,CD79A,CNN2,CTLA4,CXCL10,DOCK2,ELMO1,FCAMR,FCGR3A/FCGR3B,FCMR,HGF,ICAM1,IFNG,IL2RA,IL6,ITGAL,ITGAX,LTBP1,MAP1S,MAP4K1,MSR1,NCR2,OSM,PFDN6,PPARG,PROC,PTPRC,SAA1,SERPINE1,SFTPA1,SH2D1A,SH3BP2,SLAMF7,STAT1,TAP1,TGM2,TIGIT,TLR9,TNFRSF9	46
Cell Death and Survival,Cellular Compromise	Cytotoxicity of lymphocytes	2.32e-06	Increased	2.011	CCR3,CD274,CD59,CD6,CTLA4,DOCK2,FCGR3A/FCGR3B,ICAM1,IFNG,IL21R,IL6,ITGAL,KLRD1,MYBL2,NCR2,PRF1,PTPRC,SH2D1A,SLAMF6,STAT1,TAP2,TLR9,ULBP3,WIPF1	24
Lymphoid Tissue Structure and Development,Tissue Morphology	Quantity of lymphoid tissue	9.92e-10	Increased	2.01	APOE,BANK1,BLM,BMF,C17orf99,C4A/C4B,C5AR1,CCNB2,CD274,CD37,CD3G,CD4,CD5L,CD79A,CD8A,CRIP3,CTLA4,DOCK2,EGR2,FCAMR,FCMR,GCSAM,GNAI2,IFNG,IKZF3,IL6,JAK3,KLHL6,LAG3,LAMA3,LY9,MCF2L,MCL1,MXI1,MYBL2,NEDD9,NPY1R,OSM,POU2AF1,PRF1,PROC,PTPRC,RASSF5,RORC,RUNX3,SELP,SH2D1A,SH3BP2,STAT1,TAP1,TET3,TNFRSF13C,TPX2,WDFY4,WIPF1	55
