# Supplementary material for: Gene Expression Profiling in Coeliac Disease Confirmed the Key Role of the Immune System and Revealed a Molecular Overlap with Non-Celiac Gluten Sensitivity
Source: Int J Mol Sci. 2023 Apr 24;24(9):7769. doi: 10.3390/ijms24097769 (PMC10178871; doi:10.3390/ijms24097769)
Supplement: Supplementary file 1 [file ijms-24-07769-s001.zip › Supplementary Table S7.xlsx]

## Sheet: Shared DE Transcripts
Gene ID	Gene Symbol	Gene Group	Mean Controls	SD Controls	Mean Celiacs	SD Celiacs	Ratio Celiacs/CTRLs	FDR
A_21_P0003986	GDNF-AS1	AS	3.01633	1.18601	1.28873	0.270244	0.427252	0.020144
A_22_P00018303	SMAD1-AS1	AS	3.73312	1.04694	5.78071	0.442764	1.54849	0.0101614
A_24_P263284	CSMD2	Coding Gene	2.39463	1.05526	1.1354	0.0131192	0.474142	0.0312115
A_33_P3344673	PPP1R37	Coding Gene	4.67963	0.385029	2.33839	0.992978	0.499695	0.00328987
A_23_P308673	TAOK2	Coding Gene	5.78083	0.356235	3.09647	0.357724	0.535645	5.46e-05
A_19_P00807752	MCF2L	Coding Gene	3.8552	1.08155	2.26517	0.957861	0.587563	0.0312255
A_33_P3412143	RASSF10	Coding Gene	3.89715	0.292288	2.33308	1.12619	0.598663	0.0150091
A_23_P50674	IZUMO4	Coding Gene	3.58799	0.753068	2.14853	0.808748	0.598812	0.0200788
A_24_P181055	ST3GAL4	Coding Gene	4.58206	0.757098	2.97065	1.0918	0.648321	0.022474
A_23_P410717	CIART	Coding Gene	6.63752	1.3293	4.67284	0.709109	0.704004	0.0234197
A_23_P68487	BMP7	Coding Gene	7.8269	0.566119	5.57807	0.618998	0.712679	0.00202326
A_33_P3400578	HLF	Coding Gene	5.97772	0.649016	4.30441	0.993651	0.720075	0.0152181
A_24_P151582	TEF	Coding Gene	7.42667	0.639343	5.56559	0.565754	0.749406	0.00470955
A_23_P70127	TMED9	Coding Gene	8.80501	0.656242	7.18948	0.509159	0.816521	0.00697567
A_24_P943472	NR1D2	Coding Gene	7.14149	0.816622	5.88376	0.388447	0.823883	0.0200788
A_33_P3411388	UNCX	Coding Gene	13.5308	0.513085	11.3764	0.315362	0.840776	0.000496175
A_24_P379820	ITM2C	Coding Gene	7.1655	0.923882	6.13941	0.594561	0.856802	0.047024
A_23_P104594	SCT	Coding Gene	11.03	0.562617	9.54942	0.642177	0.865767	0.0092674
A_33_P3294002	A4GALT	Coding Gene	7.93841	0.806266	9.93403	0.352388	1.25139	0.00485156
A_33_P3227686	MROH5	Coding Gene	5.509	0.735663	7.58158	0.907025	1.37622	0.00817055
A_23_P166438	APOL5	Coding Gene	1.68016	0.426979	2.89449	0.888139	1.72274	0.0200137
A_23_P164011	SOX15	Coding Gene	1.78739	1.06135	3.24357	0.570408	1.8147	0.027688
A_33_P3409939	GNAT3	Coding Gene	1.85053	0.731812	3.62371	1.28133	1.9582	0.0221714
A_32_P176018	ACTL8	Coding Gene	3.05186	1.11062	6.38219	0.636021	2.09124	0.00269983
A_33_P3279353	AZU1	Coding Gene	1.53921	0.481042	5.32012	0.331164	3.4564	2.5e-05
A_22_P00007316	LINC01146	LINC	2.93747	0.594673	3.96207	0.501989	1.3488	0.0205808
A_21_P0011267	LINC00639	LINC	4.18987	0.994364	6.14273	0.493274	1.46609	0.0107779
A_33_P3420247	LINC01501	LINC	2.77397	0.779311	4.08318	0.552852	1.47196	0.0196743
A_22_P00008961	LINC00520	LINC	2.27057	0.850749	3.4893	1.0319	1.53675	0.0435227
A_33_P3272105	FLJ38576	lnc	2.79901	0.311673	1.23514	0.281426	0.441278	0.000347065
A_21_P0014020	lnc-GGT5-1	lnc	3.10211	0.931084	1.46432	0.707531	0.472041	0.0184599
A_22_P00003841	lnc-CEACAM18-1	lnc	2.91407	1.3517	1.44429	0.516657	0.495626	0.0418577
A_22_P00023857	lnc-YPEL5-3	lnc	3.44377	1.01846	1.84172	1.00073	0.534796	0.0292292
A_22_P00022828	lnc-RLBP1-1	lnc	2.6265	0.639602	1.42614	0.655419	0.542982	0.0200788
A_21_P0005178	lnc-CITED2-4	lnc	3.43702	0.835767	1.87475	0.98116	0.545459	0.0235415
A_21_P0008666	lnc-SH3GL3-1	lnc	2.71655	0.819679	1.56716	0.553672	0.576893	0.0292292
A_21_P0006742	lnc-MTPAP-2	lnc	3.1915	0.892306	2.01858	0.782432	0.632486	0.0393839
A_33_P3519424	lnc-CMPK2-2	lnc	3.6401	0.912957	2.35936	0.85627	0.648158	0.0362139
A_22_P00018036	lnc-ZNF236-1	lnc	7.64469	1.11505	6.54958	0.128775	0.856749	0.0475852
A_21_P0006321	lnc-PTGES2-1	lnc	4.96544	0.511497	6.46258	0.669032	1.30151	0.00799036
A_22_P00000693	lnc-ADAM21-2	lnc	3.87683	0.888289	5.45531	0.1522	1.40716	0.0119718
A_22_P00014730	lnc-SLC2A4RG-1	lnc	4.00139	0.627657	5.92521	0.35737	1.48079	0.00247318
A_22_P00013672	lnc-RP11-687M24.8.1-1	lnc	2.24223	0.952509	3.33577	0.247658	1.4877	0.0357716
A_21_P0008704	lnc-POTEB-4	lnc	1.88118	0.871989	3.18868	0.397304	1.69504	0.0212083
A_33_P3774867	lnc-AP002478.1-1	lnc	2.41694	0.780661	4.21767	0.708996	1.74505	0.0101246
A_21_P0008137	lnc-KATNAL1-3	lnc	2.31035	0.630596	5.18492	1.29926	2.24421	0.00485156
A_21_P0008156	lnc-TPT1-1	lnc	1.54333	0.611882	3.50709	0.968394	2.27242	0.00856292
A_21_P0009407	LOC101927471	LOC	2.9684	0.621848	1.10053	0.0337159	0.370748	0.0018992
A_24_P298495	LOC100130744	LOC	4.18577	0.640587	1.92865	0.618845	0.460764	0.00247813
A_21_P0000909	LOC284600	LOC	3.25889	1.00344	1.72928	0.716343	0.530635	0.0248891
A_21_P0013022	LOC101929309	LOC	3.10797	0.997389	1.80142	0.993585	0.579615	0.0435931
A_22_P00018045	LOC101928530	LOC	3.81859	0.666739	2.52069	1.12371	0.660109	0.0341178
A_21_P0007180	LOC102724957	LOC	6.04052	1.06494	4.03061	1.62938	0.667262	0.031922
A_22_P00022873	LOC102724532	LOC	8.62423	0.795613	7.02623	0.472578	0.814707	0.0110081
A_22_P00012878	LOC102723373	LOC	3.60204	0.758911	4.77475	0.597931	1.32557	0.0255361
A_33_P3333177	LOC644083	LOC	3.23019	0.884578	4.77986	0.301134	1.47974	0.0130443
A_21_P0013609	XLOC_l2_015075	LOC	2.12431	0.778684	3.80249	1.12551	1.78999	0.0218992
A_33_P3267865	HLA-J	Pseudo	7.42023	1.92993	9.71395	0.22702	1.30912	0.0317948
A_21_P0000307	SNORA2B	SNORA	10.5595	0.924827	9.15743	0.138559	0.867221	0.0181975
A_21_P0000411	SNORD114-14	SNORD	2.80347	0.850283	1.65254	0.619461	0.589461	0.0328466
A_22_P00006656			2.65583	1.39695	1.1861	0.0296093	0.446601	0.0406165
A_33_P3391316			3.8544	1.93561	1.79491	1.09333	0.465679	0.0487794
A_22_P00001056			4.10497	0.753883	2.0216	0.293831	0.492475	0.00308861
A_33_P3387320			2.64745	1.1846	1.31625	0.0451701	0.497176	0.0357716
A_22_P00005647			2.83202	1.4157	1.41819	0.0871192	0.500771	0.0454921
A_33_P3351285			2.87435	1.20979	1.52111	0.587979	0.529199	0.0417904
A_22_P00006238			2.36131	0.518137	1.25946	0.653389	0.533372	0.0187171
A_22_P00019762			2.80546	1.16652	1.5238	0.494719	0.543156	0.0418464
A_21_P0009211			4.26191	0.619624	2.40932	1.15148	0.565315	0.0143997
A_22_P00004415			5.95255	0.578604	3.40097	1.30196	0.571346	0.00667527
A_19_P00322890			3.51865	1.04356	2.13206	0.838712	0.60593	0.0364172
A_33_P3285097			3.92443	0.642784	2.44164	0.960499	0.622165	0.0194232
A_22_P00003331			5.03397	1.67152	3.23252	0.43027	0.642141	0.0404161
A_21_P0006734			4.38628	1.44434	2.83835	0.740716	0.647096	0.0464931
A_24_P281395			8.64862	1.55434	6.83063	0.280819	0.789795	0.0332219
A_33_P3321369			7.02684	0.918695	9.21276	0.581556	1.31108	0.00664095
A_21_P0014791			6.63303	0.41705	8.95598	0.21753	1.35021	0.000131019
A_33_P3299329			3.31129	0.580847	4.49735	0.951726	1.35819	0.0294423
A_21_P0013131			3.59564	1.0292	5.18187	0.471862	1.44115	0.0200137
A_22_P00024772			2.45618	1.02658	3.8739	0.486714	1.5772	0.0258017
A_22_P00013662			2.0616	0.714628	3.41767	0.335554	1.65778	0.0117688
A_21_P0008949			3.08503	1.39442	5.13826	0.879361	1.66554	0.0252085
A_33_P3301932			1.55083	0.521687	2.5843	0.946811	1.6664	0.0366845
