# Supplementary material for: Gene Expression Profiling in Coeliac Disease Confirmed the Key Role of the Immune System and Revealed a Molecular Overlap with Non-Celiac Gluten Sensitivity
Source: Int J Mol Sci. 2023 Apr 24;24(9):7769. doi: 10.3390/ijms24097769 (PMC10178871; doi:10.3390/ijms24097769)
Supplement: Supplementary file 1 [file ijms-24-07769-s001.zip › Supplementary Table S8.xlsx]

## Sheet: Regulator of shared DE genes
Upstream Regulator	Expr Fold Change	Molecule Type	Predicted Activation State	Activation z-score	Flags	p-value of overlap	Target Molecules in Dataset
miR-6887-3p (miRNAs w/seed CCCCUCC)		mature microRNA	Activated	2.449	bias	0.0113	BMP7,CABIN1,NR1D2,PPP1R37,SCT,TMED9
miR-802-3p (and other miRNAs w/seed CGGAGAG)		mature microRNA	Activated	2.236	bias	0.0021	CSMD2,HLF,IZUMO4,MCF2L,TEF
miR-7108-3p (miRNAs w/seed CCCGCCC)		mature microRNA	Activated	2.236	bias	0.0023	BMP7,ITM2C,IZUMO4,PPP1R37,TEF
miR-329-3p (and other miRNAs w/seed ACACACC)		mature microRNA	Activated	2.219	bias	0.023	BMP7,CSMD2,HLF,TEF,TMED9
miR-16-1-3p (miRNAs w/seed CAGUAUU)		mature microRNA	Activated	2	bias	0.0066	CABIN1,HLF,NR1D2,TMED9
miR-3075 (and other miRNAs w/seed GUCUGGG)		mature microRNA	Activated	2	bias	0.0423	ITM2C,MCF2L,ST3GAL4,UNCX
miR-1260a (and other miRNAs w/seed UCCCACC)		mature microRNA	Activated	2	bias	0.0396	PPP1R37,RPL31,TAOK2,TMED9
miR-501-3p (and other miRNAs w/seed AUGCACC)		mature microRNA	Activated	2	bias	0.0152	CAST,HLF,NR1D2,TEF
miR-3943 (miRNAs w/seed AGCCCCC)		mature microRNA	Activated	2	bias	0.0301	MCF2L,PPP1R37,ST3GAL4,TEF
miR-1900 (and other miRNAs w/seed GCCGCCC)		mature microRNA	Activated	2	bias	0.0131	CSMD2,ITM2C,MCF2L,UNCX
miR-4323 (miRNAs w/seed AGCCCCA)		mature microRNA	Activated	2	bias	0.0224	ITM2C,PPP1R37,TEF,TMED9
miR-1262 (and other miRNAs w/seed UGGGUGA)		mature microRNA	Activated	2	bias	0.0398	HLF,TAOK2,TEF,TMED9
miR-4290 (miRNAs w/seed GCCCUCC)		mature microRNA	Activated	2	bias	0.0463	BMP7,ITM2C,IZUMO4,ST3GAL4
miR-7243-5p (miRNAs w/seed GCUGUCA)		mature microRNA	Activated	2	bias	0.0276	CSMD2,RASSF10,TEF,TMED9
miR-6998-5p (miRNAs w/seed UGGGCAG)		mature microRNA	Activated	2	bias	0.0441	BMP7,CABIN1,CSMD2,ST3GAL4
miR-6781-5p (miRNAs w/seed GGGCCGG)		mature microRNA	Activated	2	bias	0.0151	CSMD2,MCF2L,SCT,UNCX
